# Supplementary material for: The state of the late Quaternary megafauna extinction debate: a systematic review and analysis
Source: Frontiers journal article supplement (doi:10.3389/fmamm.2025.1678231), 2025-10-16
Supplement: Table_1.xlsx [file Table_1.xlsx]

## Sheet: Papers_list_final
Publication Type	Authors	Author Full Names							Article Title	Source Title	Language	Document Type	Author Keywords	Keywords Plus	Abstract	Addresses	Affiliations	Reprint Addresses	Email Addresses	Researcher Ids	ORCIDs	Funding Orgs	Funding Name Preferred	Funding Text	Cited Reference Count	Times Cited, WoS Core	Times Cited, All Databases	180 Day Usage Count	Since 2013 Usage Count	Publisher	Publisher City	Publisher Address	ISSN	eISSN	ISBN	Journal Abbreviation	Journal ISO Abbreviation	Publication Date	Publication Year	Volume	Issue	Start Page	End Page	Article Number	DOI	DOI Link	Book DOI	Early Access Date	Number of Pages
J	Aceituno, FJ; Loaiza, N; Delgado-Burbano, ME; Barrientos, G	Aceituno, Francisco J.; Loaiza, Nicolas; Eduardo Delgado-Burbano, Miguel; Barrientos, Gustavo							The initial human settlement of Northwest South America during the Pleistocene/Holocene transition: Synthesis and perspectives	Quaternary International	English	Article		y-chromosome diversity; Upper Quaternary; Colombia; extinction; vegetation; migration	The northwestern corner of South America, represented by the current territory of Colombia, is a key region to assess some relevant issues linked with the initial human peopling of the area, including population dispersals, cultural diversity, and early adaptations to the changing environmental conditions experienced by lowland and highland north-Andean Neotropical ecosystems at the Pleistocene/H…	[Aceituno, Francisco J.; Loaiza, Nicolas] Univ Antioquia, Dept Antropol, Grp Medioambiente & Soc, Medellin 1226, Colombia; [Loaiza, Nicolas] Temple Univ, Dept Anthropol, Philadelphia, PA 19119 USA; [Eduardo Delgado-Burbano, Miguel; Barrientos, Gustavo] Univ Nacl La Plata, Fac Ciencias Nat & Museo, Div Antropol, La Plata, Buenos Aires, Argentina; [Eduardo Delgado-Burbano, Miguel; Barrientos, Gusta…	Universidad de Antioquia; Pennsylvania Commonwealth System of Higher Education (PCSHE); Temple University; National University of La Plata; Museo La Plata; Consejo Nacional de Investigaciones Cientificas y Tecnicas (CONICET)	Aceituno, FJ (corresponding author), Univ Antioquia, Dept Antropol, Grp Medioambiente & Soc, Calle 67 53-108, Medellin 1226, Colombia.	csfjace@antares.udea.edu.co; nloaiza@temple.edu; medelgado@fcnym.unlp.edu.ar; barrient@museo.fcnym.unlp.edu.ar	Delgado, Miguel/AAV-6195-2021	Loaiza, Nicolas/0000-0002-3683-7721; Delgado, Miguel/0000-0001-6221-1186	Colciencias	Colciencias(Departamento Administrativo de Ciencia, Tecnologia e Innovacion Colciencias)	We thank Lucas Bueno, Gustavo Politis, Luciano Prates, and James Steele for the invitation to participate in the special volume Central and South American Archaeology and Paleoenvironment. An early version of this paper was presented by Francisco Javier Aceituno in the symposium constructing a database of late Pleistocene/early Holocene archaeological C14 date in the framework of 76th SAA Annual …	93	57	64	0	40	PERGAMON-ELSEVIER SCIENCE LTD	OXFORD	THE BOULEVARD, LANGFORD LANE, KIDLINGTON, OXFORD OX5 1GB, ENGLAND	1040-6182	1873-4553		QUATERN INT	Quat. Int.	2008-07-01	2013	301		23	33		10.1016/j.quaint.2012.05.017	http://dx.doi.org/10.1016/j.quaint.2012.05.017			11
J	Adeleye, MA; Andrew, SC; Gallagher, R; van der Kaars, S; De Deckker, P; Hua, Q; Haberle, SG	Adeleye, Matthew Adesanya; Andrew, Samuel Charles; Gallagher, Rachael; van der Kaars, Sander; De Deckker, Patrick; Hua, Quan; Haberle, Simon Graeme							On the timing of megafaunal extinction and associated floristic consequences in Australia through the lens of functional palaeoecology	Quaternary Science Reviews	English	Article	megafaunal extinction; plant traits; functional palaeoecology; Sporormiella; charcoal; AMS C-14 dating; human activity	dung fungal spores: Pleistocene Australia; vegetation change; ecosystem; north	The timing and cause of megafaunal extinctions are an enduring focus of research interest and debate. Despite the developments in the analysis of coprophilous fungal spores (CFS), the proxy for reconstructing past megaherbivore changes, the environmental consequences of this fauna loss remain understudied. This is partly due to the general obscurity of such a signal in pollen records, as well as …	[Adeleye, Matthew Adesanya] Univ Cambridge, Dept Geog, 20 Downing Pl, Cambridge CB2 3EL, Cambs, England; [Adeleye, Matthew Adesanya; Haberle, Simon Graeme] Australian Natl Univ, Sch Culture Hist & Language, 9 Fellows Rd,HC Coombs, Acton, ACT 2600, Australia; [Adeleye, Matthew Adesanya; Haberle, Simon Graeme] Australian Natl Univ, Australian Res Council Ctr Excellence Australian, HC Coombs, 9 Fell…	University of Cambridge; Australian National University; Australian National University; Commonwealth Scientific & Industrial Research Organisation (CSIRO); Western Sydney University; Monash University; Vrije Universiteit Amsterdam; Australian National University; Australian Nuclear Science & Technology Organisation	Adeleye, MA (corresponding author), Univ Cambridge, Dept Geog, 20 Downing Pl, Cambridge CB2 3EL, Cambs, England.	ma2073@cam.ac.uk; sam.andrew@csiro.au; rachael.gallagher@westernsydney.edu.au; sander.vanderkaars@monash.edu; patrick.dedeckker@anu.edu.au; qhx@ansto.gov.au; simon.haberle@anu.edu.au	Gallagher, Rachael/JLM-3743-2023; Adeleye, Matthew/ABA-5621-2022; Andrew, Samuel/J-6739-2019; van der Kaars, Sander/G-2268-2016	Andrew, Samuel/0000-0003-4589-2746; van der Kaars, Sander/0000-0002-2511-0439; Haberle, Simon/0000-0001-5802-6535; Adeleye, Matthew/0000-0002-6034-5807	Australian Research Council (ARC) Centre of Excellence for Australian Biodiversity and Heritage [CE170100015]; French Polar Institute; National Oceans Office; ARC DP grant [DP0344932]	Australian Research Council (ARC) Centre of Excellence for Australian Biodiversity and Heritage(Australian Research Council); French Polar Institute; National Oceans Office; ARC DP grant(Australian Research Council)	The authors acknowledge field and laboratory assistance from Yvon Balut (Manager of the RV Marion Dufresne) and Martine Hagen for processing the core samples for pollen and spore count. MAA and SGH acknowledge funding from the Australian Research Council (ARC) Centre of Excellence for Australian Biodiversity and Heritage (CE170100015) and PDD acknowledges funding from the French Polar Institute, …	68	4	4	2	9	PERGAMON-ELSEVIER SCIENCE LTD	OXFORD	THE BOULEVARD, LANGFORD LANE, KIDLINGTON, OXFORD OX5 1GB, ENGLAND	0277-3791	1873-457X		QUATERNARY SCI REV	Quat. Sci. Rev.	2015-09-01	2023	316				108263	10.1016/j.quascirev.2023.108263	http://dx.doi.org/10.1016/j.quascirev.2023.108263		2023-08-01	11
J	Alberdi, MT; Bonini, R; Bellinzoni, J; Gómez, G; Steffan, P; Lucero, N; Prado, JL	Alberdi, Maria T.; Bonini, Ricardo; Bellinzoni, Jonathan; Gomez, Gustavo; Steffan, Pamela; Lucero, Natalia; Prado, Jose L.							New records of Equus and Hippidion (Mammalia, Perissodactyla) from the Late Pleistocene of the Salado River (Buenos Aires province, Argentina)	Neues Jahrbuch fur Geologie und Palaontologie-Abhandlungen	English	Article	mammals; Equidae; Hippidion; Equus; Late Pleistocene; Junin; Argentina	Pampean regions; basin; Holocene; climate; horses; equids; Gomphotheres; stratigraphy; extinction; Amerhippus	The sedimentary sequences exposed along the banks of the Salado River (Buenos Aires province) preserve an important Late Pleistocene Megafauna. This paper describes new specimens of Hippidion and Equus from a Late Pleistocene locality near Junin City at the middle course of the Salado River. The comparative study with other horses from different South American localities, mostly from Argentina an…	[Alberdi, Maria T.] Museo Nacl Ciencias Nat CSIC, Dept Paleobiol, Jose Gutierrez Abascal 2, Madrid 28006, Spain; [Bonini, Ricardo; Bellinzoni, Jonathan; Gomez, Gustavo; Steffan, Pamela; Prado, Jose L.] Univ Nacl Ctr Prov Buenos Aires, Dept Arqueol, INCUAPA CONICET, Valle 5737, RA-7400 Olavarria, Buenos Aires, Argentina; [Lucero, Natalia] Museo Municipal Paleontol Legado Salado, Camino Parque Nat …	Consejo Superior de Investigaciones Cientificas (CSIC); CSIC - Museo Nacional de Ciencias Naturales (MNCN); Comision Nacional de Energia Atomica (CNEA)	Alberdi, MT (corresponding author), Museo Nacl Ciencias Nat CSIC, Dept Paleobiol, Jose Gutierrez Abascal 2, Madrid 28006, Spain.	malberdi@mncn.csic.es; rbonini@soc.unicen.edu.ar; jonabillinzoni@gmail.com; ggomez@soc.unicen.edu.ar; psteffan@soc.unicen.edu.ar; nalucero@gmail.com; jprado@soc.unicen.edu.ar			I-COOPB from Spain [2019-03480, PID2021-126933NB-100]; National University of Central Argentina (UNICEN) [20589]; CONICET; PICT	I-COOPB from Spain; National University of Central Argentina (UNICEN); CONICET(Consejo Nacional de Investigaciones Cientificas y Tecnicas (CONICET)); PICT(ANPCyT)	The manuscript was greatly improved by thoughtful reviews from LUCA BELLUCCI and JOAQUIN ARROYO- CABRALES. This work has been made possible thanks to Research Project PID2021-126933NB-100 and I-COOPB 20589 from Spain, a Grant from the National University of Central Argentina (UNICEN) and CONICET to INCUAPA, and PICT 2019-03480 to J.L.P.	79	0	0	0	2	E SCHWEIZERBARTSCHE VERLAGSBUCHHANDLUNG	STUTTGART	NAEGELE U OBERMILLER, SCIENCE PUBLISHERS, JOHANNESSTRASSE 3A, D 70176 STUTTGART, GERMANY	0077-7749			NEUES JAHRB GEOL P-A	Neues. Jahrb. Geol. Palaontol.-Abh.	SEP	2023	309	3	273	290		10.1127/njgpa/2023/1162	http://dx.doi.org/10.1127/njgpa/2023/1162			18
J	Albrecht, J; Barton, KA; Selva, N; Sommer, RS; Swenson, JE; Bischof, R	Albrecht, Joerg; Barton, Kamil A.; Selva, Nuria; Sommer, Robert S.; Swenson, Jon E.; Bischof, Richard							Humans and climate change drove the Holocene decline of the brown bear	Scientific Reports	English	Article		species richness; Pleistocene Europe; extinctions; range; deer; reconstructions; precipitation; variability; megafauna	The current debate about megafaunal extinctions during the Quaternary focuses on the extent to which they were driven by humans, climate change, or both. These two factors may have interacted in a complex and unexpected manner, leaving the exact pathways to prehistoric extinctions unresolved. Here we quantify, with unprecedented detail, the contribution of humans and climate change to the Holocen…	[Albrecht, Joerg; Barton, Kamil A.; Selva, Nuria] Polish Acad Sci, Inst Nat Conservat, Mickiewicza 33, PL-31120 Krakow, Poland; [Sommer, Robert S.] Univ Rostock, Dept Zool, Inst Biosci, Univ Pl 2, D-18055 Rostock, Germany; [Swenson, Jon E.; Bischof, Richard] Norwegian Univ Life Sci, Fac Environm Sci & Nat Resource Management, POB 5003, NO-1432 As, Norway; [Swenson, Jon E.] Norwegian Inst Nat Res,…	Polish Academy of Sciences; University of Rostock; Norwegian University of Life Sciences; Norwegian Institute Nature Research; Senckenberg Biodiversitat & Klima- Forschungszentrum (BiK-F); Leibniz Association; Senckenberg Gesellschaft fur Naturforschung (SGN)	Albrecht, J (corresponding author), Polish Acad Sci, Inst Nat Conservat, Mickiewicza 33, PL-31120 Krakow, Poland.;Albrecht, J (corresponding author), Senckenberg Biodivers & Climate Res Ctr BiK F, Senckenberganlage 25, D-60325 Frankfurt, Germany.	joerg.albrecht@senckenberg.de	Swenson, Jon/AAE-2890-2019; Selva, Nuria/J-6970-2013; Albrecht, Jorg/ABG-9491-2021	Selva, Nuria/0000-0003-3389-201X; Barton, Kamil/0000-0001-5562-8274; Albrecht, Jorg/0000-0002-9708-9413	Norway grants under the Polish-Norwegian Research Programme [POL-NOR/198352/85/2013]; German Academic Exchange Service (DAAD) [91568794]; Polish National Science Centre [2015/16/S/NZ8]; Centre for Advanced Studies at the Norwegian Academy of Science and Letters; German Research Foundation (DFG); PLGrid Infrastructure	Norway grants under the Polish-Norwegian Research Programme; German Academic Exchange Service (DAAD)(Deutscher Akademischer Austausch Dienst (DAAD)); Polish National Science Centre; Centre for Advanced Studies at the Norwegian Academy of Science and Letters; German Research Foundation (DFG)(German Research Foundation (DFG)); PLGrid Infrastructure	This study was funded by the Norway grants under the Polish-Norwegian Research Programme administered by the National Research Centre for Research and Development in Poland (J.A., K.A.B., N.S., J.E.S., R.B.; GLOBE No POL-NOR/198352/85/2013). J.A. was partly funded by the German Academic Exchange Service in the framework of a post doctorate fellowship grant (DAAD, No 91568794). K.A.B. was partly s…	73	25	25	4	45	NATURE PORTFOLIO	BERLIN	HEIDELBERGER PLATZ 3, BERLIN, 14197, GERMANY	2045-2322			SCI REP-UK	Sci Rep	2004-09-01	2017	7				10399	10.1038/s41598-017-10772-6	http://dx.doi.org/10.1038/s41598-017-10772-6			11
J	Allen, JRM; Hickler, T; Singarayer, JS; Sykes, MT; Valdes, PJ; Huntley, B	Allen, Judy R. M.; Hickler, Thomas; Singarayer, Joy S.; Sykes, Martin T.; Valdes, Paul J.; Huntley, Brian							Last glacial vegetation of northern Eurasia	Quaternary Science Reviews	English	Article		oxygen isotope stage 3; Grande di Monticchio; PMIP2 coupled simulations; climate change; European vegetation; chloroplast DNA; pollen data; model; Mid-Holocene; ecosystems	In order to investigate the potential role of vegetation changes in megafaunal extinctions during the later part of the last glacial stage and early Holocene (42-10 ka BP), the palaeovegetation of northern Eurasia and Alaska was simulated using the LPJ-GUESS dynamic vegetation model. Palaeoclimatic driving data were derived from simulations made for 22 time slices using the Hadley Centre Unified …	[Allen, Judy R. M.; Huntley, Brian] Univ Durham, Sch Biol & Biomed Sci, Durham DH1 3LE, England; [Hickler, Thomas; Sykes, Martin T.] Lund Univ, Dept Phys Geog & Ecosyst Anal, Geobiosphere Sci Ctr, S-22362 Lund, Sweden; [Singarayer, Joy S.; Valdes, Paul J.] Univ Bristol, Sch Geog Sci, Bristol BS8 1SS, Avon, England	Durham University; Lund University; University of Bristol	Huntley, B (corresponding author), Univ Durham, Sch Biol & Biomed Sci, South Rd, Durham DH1 3LE, England.	brian.huntley@durham.ac.uk	Valdes, Paul/T-2004-2019; Hickler, Thomas/S-6287-2016	Hickler, Thomas/0000-0002-4668-7552; Valdes, Paul/0000-0002-1902-3283	UK Natural Environment Research Council [NE/D003105]; NERC [NE/G005982/1, NE/D001846/1, NE/E007600/1, NE/D003105/1, NE/D003105/2, NE/G00188X/1] Funding Source: UKRI	UK Natural Environment Research Council(UK Research & Innovation (UKRI)Natural Environment Research Council (NERC)); NERC(UK Research & Innovation (UKRI)Natural Environment Research Council (NERC))	The work reported formed part of the project Pleistocene to Holocene extinction dynamics of Northern Eurasian megafauna, in relation to human activity and environmental change and was supported by a grant from the UK Natural Environment Research Council (NE/D003105). Dr Yvonne Collingham provided invaluable computational support and Dr Paul Miller provided key advice with respect to aspects of th…	71	96	102	1	4	PERGAMON-ELSEVIER SCIENCE LTD	OXFORD	THE BOULEVARD, LANGFORD LANE, KIDLINGTON, OXFORD OX5 1GB, ENGLAND	0277-3791	1873-457X		QUATERNARY SCI REV	Quat. Sci. Rev.	SEP	2010	29	19-20	2604	2618		10.1016/j.quascirev.2010.05.031	http://dx.doi.org/10.1016/j.quascirev.2010.05.031			15
J	Allentoft, ME; Heller, R; Oskam, CL; Lorenzen, ED; Hale, ML; Gilbert, MTP; Jacomb, C; Holdaway, RN; Bunce, M	Allentoft, Morten Erik; Heller, Rasmus; Oskam, Charlotte L.; Lorenzen, Eline D.; Hale, Marie L.; Gilbert, M. Thomas P.; Jacomb, Christopher; Holdaway, Richard N.; Bunce, Michael							Extinct New Zealand megafauna were not in decline before human colonization	Proceedings of the National Academy of Sciences of the United States of America	English	Article		Quaternary fossil faunas; South island; north Canterbury; DNA sequences; moa; Pleistocene; software; model; Aves; overkill	The extinction of New Zealand's moa (Aves: Dinornithiformes) followed the arrival of humans in the late 13th century and was the final event of the prehistoric Late Quaternary megafauna extinctions. Determining the state of the moa populations in the preextinction period is fundamental to understanding the causes of the event. We sampled 281 moa individuals and combined radiocarbon dating with an…	[Allentoft, Morten Erik; Lorenzen, Eline D.; Gilbert, M. Thomas P.] Univ Copenhagen, Ctr GeoGenet, Nat Hist Museum, DK-1350 Copenhagen K, Denmark; [Allentoft, Morten Erik; Oskam, Charlotte L.; Bunce, Michael] Murdoch Univ, Sch Vet & Life Sci, Ancient DNA Lab, Perth, WA 6150, Australia; [Allentoft, Morten Erik; Hale, Marie L.; Holdaway, Richard N.] Univ Canterbury, Sch Biol Sci, Christchurch 8140,…	University of Copenhagen; Murdoch University; University of Canterbury; University of Copenhagen; Instituto Gulbenkian de Ciencia; University of California System; University of California Berkeley; University of Otago; Curtin University	Allentoft, ME (corresponding author), Univ Copenhagen, Ctr GeoGenet, Nat Hist Museum, DK-1350 Copenhagen K, Denmark.	morten.allentoft@gmail.com; michael.bunce@curtin.edu.au	Bruford, Michael/D-3750-2009; Heller, Rasmus/M-2580-2014; Gilbert, Marcus/A-8936-2013; Lorenzen, Eline/D-1442-2012; Oskam, Charlotte/N-4097-2018	Bunce, Michael/0000-0002-0302-4206; Heller, Rasmus/0000-0001-6583-6923; Gilbert, Marcus/0000-0002-5805-7195; Lorenzen, Eline/0000-0002-6353-2819; Allentoft, Morten/0000-0003-4424-3568; Oskam, Charlotte/0000-0001-8886-2120	Marsden Fund of the Royal Society of New Zealand [06-PAL-001-EEB, 09-UOO-164]; European Research Council Marie Curie Actions [300554]; Australian Research Council Future Fellowship [FT0991741]	Marsden Fund of the Royal Society of New Zealand(Royal Society of New ZealandMarsden Fund (NZ)); European Research Council Marie Curie Actions(Marie Curie ActionsEuropean Research Council (ERC)); Australian Research Council Future Fellowship(Australian Research Council)	We thank the Museum of New Zealand, Te Papa Tongarewa (A. J. D. Tennyson), Canterbury Museum (P. Scofield), and the American Museum of Natural History (C. Mehling). We also thank Eske Willerslev, Malene Mohl, James Haile, and Ross Barnett for assistance with the sequencing and sampling; Jayne Houston, Emma McLay, Helen Hunt, and Frances Brigg for technical assistance; Daniel Wegmann, Simon Ho, Ch…	58	78	91	1	93	NATL ACAD SCIENCES	WASHINGTON	2101 CONSTITUTION AVE NW, WASHINGTON, DC 20418 USA	0027-8424			P NATL ACAD SCI USA	Proc. Natl. Acad. Sci. U. S. A.	2001-04-01	2014	111	13	4922	4927		10.1073/pnas.1314972111	http://dx.doi.org/10.1073/pnas.1314972111			6
J	Amir, Z; Moore, JH; Negret, PJ; Luskin, MS	Amir, Zachary; Moore, Jonathan H.; Negret, Pablo Jose; Luskin, Matthew Scott							Megafauna extinctions produce idiosyncratic Anthropocene assemblages	Science Advances	English	Article		Dicerorhinus sumatrensis; population size; Asian elephants; Southeast Asia; Pleistocene; wildlife; forest; defaunation; models; Borneo	The trophic downgrading of planet Earth refers to the systematic decline of the world's largest vertebrates. However, our understanding of why megafauna extinction risk varies through time and the importance of site- or species-specific factors remain unclear. Here, we unravel the unexpected variability in remaining terrestrial megafauna assemblages across 10 Southeast Asian tropical forests. Con…	[Amir, Zachary; Luskin, Matthew Scott] Univ Queensland, Sch Biol Sci, St Lucia, Qld, Australia; [Moore, Jonathan H.] Univ East Anglia, Sch Environm Sci, Norwich, Norfolk, England; [Negret, Pablo Jose] Univ Queensland, Sch Earth & Environm Sci, St Lucia, Qld, Australia; [Luskin, Matthew Scott] Univ Queensland, Ctr Biodivers & Conservat Sci, St Lucia, Qld, Australia	University of Queensland; University of East Anglia; University of Queensland; University of Queensland	Amir, Z (corresponding author), Univ Queensland, Sch Biol Sci, St Lucia, Qld, Australia.	z.amir@uq.edu.au	Luskin, Matthew/GSE-0196-2022	Luskin, Matthew/0000-0002-5236-7096; Moore, Jonathan/0000-0001-7265-5231; Amir, Zachary/0000-0002-8398-2059; Negret, Pablo Jose/0000-0002-4683-839X	Smithsonian Institution's ForestGEO program, Nanyang Technological University in Singapore; National Geographic Society from Committee for the Research and Exploration [9384-13]; Australian Research Council [DE210101440]; Australian Research Council [DE210101440] Funding Source: Australian Research Council	Smithsonian Institution's ForestGEO program, Nanyang Technological University in Singapore; National Geographic Society from Committee for the Research and Exploration(National Geographic Society); Australian Research Council(Australian Research Council); Australian Research Council(Australian Research Council)	The research was funded by the Smithsonian Institution's ForestGEO program, Nanyang Technological University in Singapore, the National Geographic Society from Committee for the Research and Exploration no. 9384-13, and numerous small grants for fieldwork. M.S.L. was supported by an Australian Research Council Discovery Early Career Researcher Award no. DE210101440.	95	14	14	0	19	AMER ASSOC ADVANCEMENT SCIENCE	WASHINGTON	1200 NEW YORK AVE, NW, WASHINGTON, DC 20005 USA	2375-2548			SCI ADV	Sci. Adv.	2019-10-01	2022	8	42			eabq2307	10.1126/sciadv.abq2307	http://dx.doi.org/10.1126/sciadv.abq2307			11
J	Araújo, T; Machado, H; Mothé, D; Avilla, LD	Araujo, Thaisa; Machado, Helena; Mothe, Dimila; Avilla, Leonardo dos Santos							Species distribution modeling reveals the ecological niche of extinct megafauna from South America	Quaternary Research	English	Article	climatic changes; Equus; Notiomastodon; Quaternary; paleoecology; extinction	Late Quaternary; Mid-Holocene climate; Late Pleistocene; Holocene; history; habitat; state	Climatic and environmental changes, as well as human action, have been cited as potential causes for the extinction of megafauna in South America at the end of the Pleistocene. Among megamammals lineages with Holarctic origin, only horses and proboscideans went extinct in South America during this period. This study aims to understand how the spatial extent of habitats suitable for Equus neogeus …	[Araujo, Thaisa; Mothe, Dimila; Avilla, Leonardo dos Santos] Univ Fed Estado Rio de Janeiro, Inst Biociencias, Lab Mastozool, Av Pasteur 458,Sala 501, BR-22290255 Rio De Janeiro, RJ, Brazil; [Araujo, Thaisa; Mothe, Dimila; Avilla, Leonardo dos Santos] Univ Fed Rio de Janeiro, Ctr Ciencias Saude, Programa Posgrad Biodiversidade & Biol Evolut PPG, BR-21941902 Rio De Janeiro, RJ, Brazil; [Machado, H…	Universidade Federal do Estado do Rio de Janeiro; Universidade Federal do Rio de Janeiro; University of Oregon	Araújo, T (corresponding author), Univ Fed Estado Rio de Janeiro, Inst Biociencias, Lab Mastozool, Av Pasteur 458,Sala 501, BR-22290255 Rio De Janeiro, RJ, Brazil.;Araújo, T (corresponding author), Univ Fed Rio de Janeiro, Ctr Ciencias Saude, Programa Posgrad Biodiversidade & Biol Evolut PPG, BR-21941902 Rio De Janeiro, RJ, Brazil.	thaisa.souza@hotmail.com	Mothé, Dimila/ABE-8262-2020; MACHADO, HELENA/GVS-1123-2022; Araújo, Thaísa/GQP-7760-2022	Araujo, Thaisa/0000-0001-7809-6266; Mothe, Dimila/0000-0002-4073-5963	Conselho Nacional de Desenvolvimento Cientifico e Tecnologico [140453/2012-01, 201081/2014-8, 153536/2016-0, 248772/2013-9]; Coordenacao de Aperfeicoamento de Pessoal de Nivel Superior [CAPES/PNPD/2016]; Fundacao Carlos Chagas de Amparo a Pesquisa do Estado do Rio de Janeiro [E-26/100.246/2014, 202.375/2018, 202.376/2018, 204036-E_25/2014]; Department of Earth Sciences, University of Oregon; Nati…	Conselho Nacional de Desenvolvimento Cientifico e Tecnologico(Conselho Nacional de Desenvolvimento Cientifico e Tecnologico (CNPQ)); Coordenacao de Aperfeicoamento de Pessoal de Nivel Superior(Coordenacao de Aperfeicoamento de Pessoal de Nivel Superior (CAPES)); Fundacao Carlos Chagas de Amparo a Pesquisa do Estado do Rio de Janeiro; Department of Earth Sciences, University of Oregon; National Sc…	This work was funded by Conselho Nacional de Desenvolvimento Cientifico e Tecnologico (140453/2012-01, 201081/2014-8, PDJ; 153536/2016-0, DM; 248772/2013-9, LSA), Coordenacao de Aperfeicoamento de Pessoal de Nivel Superior (CAPES/PNPD/2016; DM), UNIRIO IC (TA) and Fundacao Carlos Chagas de Amparo a Pesquisa do Estado do Rio de Janeiro (E-26/100.246/2014, 202.375/2018 and 202.376/2018, DM; 204036-…	63	9	10	0	14	CAMBRIDGE UNIV PRESS	NEW YORK	32 AVENUE OF THE AMERICAS, NEW YORK, NY 10013-2473 USA	0033-5894	1096-0287		QUATERNARY RES	Quat. Res.	NOV	2021	104		151	158	PII S0033589421000247	10.1017/qua.2021.24	http://dx.doi.org/10.1017/qua.2021.24			8
J	Ayliffe, LK; Prideaux, GJ; Bird, MI; Grün, R; Roberts, RG; Gully, GA; Jones, R; Fifield, LK; Cresswell, RG	Ayliffe, Linda K.; Prideaux, Gavin J.; Bird, Michael I.; Gruen, Rainer; Roberts, Richard G.; Gully, Grant A.; Jones, Rhys; Fifield, L. Keith; Cresswell, Richard G.							Age constraints on Pleistocene megafauna at Tight Entrance Cave in southwestern Australia	Quaternary Science Reviews	English	Article		extinction; Quaternary	A well-stratified succession of fossiliferous sediments occurs in Tight Entrance Cave, southwestern Australia. These infill deposits contain the remains of megafauna and have accumulated intermittently since the Middle Pleistocene: >137,137-119 and 50-29 ka, according to the results of C-14, U-Th, ESR and OSL dating techniques. Megafaunal species richness was highest in the latest part of the pen…	[Ayliffe, Linda K.; Bird, Michael I.; Gruen, Rainer] Australian Natl Univ, Res Sch Earth Sci, Canberra, ACT 0200, Australia; [Ayliffe, Linda K.] CEA, CNRS, Lab Sci Climat & Environm, Unite Mixte, F-91198 Gif Sur Yvette, France; [Prideaux, Gavin J.; Gully, Grant A.] Flinders Univ S Australia, Sch Biol Sci, Bedford Pk, SA 5042, Australia; [Roberts, Richard G.] Univ Wollongong, Sch Earth & Environm …	Australian National University; CEA; Universite Paris Saclay; Centre National de la Recherche Scientifique (CNRS); Flinders University South Australia; University of Wollongong; Australian National University; Australian National University	Ayliffe, LK (corresponding author), Australian Natl Univ, Res Sch Earth Sci, Canberra, ACT 0200, Australia.	linda.ayliffe@anu.edu.au	Jones, Rhys/KJB-7416-2024; Roberts, Richard/B-8245-2013; Ayliffe, Linda/C-3627-2009; Cresswell, Richard/AAA-2411-2020; Bird, Michael/G-5364-2010; Grun, Rainer/A-1437-2012	Roberts, Richard G./0000-0002-0128-4119; Fifield, Leslie/0000-0003-2866-4944; Bird, Michael/0000-0003-1801-8703; Prideaux, Gavin/0000-0002-9958-0265; Grun, Rainer/0000-0003-1366-3674	Flinders University Research Budget Grant; Western Australian Department of Environment and Conservation; Augusta-Margaret River Tourism Association; Australian Research Council	Flinders University Research Budget Grant; Western Australian Department of Environment and Conservation; Augusta-Margaret River Tourism Association; Australian Research Council(Australian Research Council)	We thank the many volunteers for assistance with excavations; Lindsay Hatcher for bringing the deposit to our attention and for supporting our work; John Long and Alex Baynes for providing advice and use of personal and Western Australian Museum resources; Mark Norton for providing use of his generator; Neil Taylor and Robyn McBeath for logistic support. Peter Daenke and the late Ed Bailey skillf…	28	17	18	0	7	PERGAMON-ELSEVIER SCIENCE LTD	OXFORD	THE BOULEVARD, LANGFORD LANE, KIDLINGTON, OXFORD OX5 1GB, ENGLAND	0277-3791			QUATERNARY SCI REV	Quat. Sci. Rev.	SEP	2008	27	17-18	1784	1788		10.1016/j.quascirev.2008.07.008	http://dx.doi.org/10.1016/j.quascirev.2008.07.008			5
J	Baca, M; Popovic, D; Stefaniak, K; Marciszak, A; Urbanowski, M; Nadachowski, A; Mackiewicz, P	Baca, Mateusz; Popovic, Danijela; Stefaniak, Krzysztof; Marciszak, Adrian; Urbanowski, Mikolaj; Nadachowski, Adam; Mackiewicz, Pawel							Retreat and extinction of the Late Pleistocene cave bear (Ursus spelaeus sensu lato)	Science of Nature	English	Article	ancient DNA; cave bear; extinction; Last Glacial Maximum; megafauna; refugium	Last Glacial Maximum; Pestera cu Oase; mitochondrial DNA; stable isotopes; inferring extinction; paleobiological implications; postglacial colonization; model choice; ancient DNA; refugia	The cave bear (Ursus spelaeus sensu lato) is a typical representative of Pleistocene megafauna which became extinct at the end of the Last Glacial. Detailed knowledge of cave bear extinction could explain this spectacular ecological transformation. The paper provides a report on the youngest remains of the cave bear dated to 20,930 +/- 140 C-14 years before present (BP). Ancient DNA analyses prov…	[Baca, Mateusz] Univ Warsaw, Ctr Precolumbian Studies, Krakowskie Przedmiescie 26-28, PL-00927 Warsaw, Poland; [Baca, Mateusz] Univ Warsaw, Inst Genet & Biotechnol, Pawinskiego 5A, PL-02106 Warsaw, Poland; [Popovic, Danijela] Univ Warsaw, Ctr New Technol, S Banacha 2c, PL-02097 Warsaw, Poland; [Stefaniak, Krzysztof; Marciszak, Adrian] Univ Wroclaw, Inst Environm Biol, Dept Paleozool, Sienkiewicza…	University of Warsaw; University of Warsaw; University of Warsaw; University of Wroclaw; University of Szczecin; Polish Academy of Sciences; Institute of Systematics & Evolution of Animals of the Polish Academy of Sciences; University of Wroclaw	Mackiewicz, P (corresponding author), Univ Wroclaw, Fac Biotechnol, Dept Genom, Joliot Curie 14a, PL-50383 Wroclaw, Poland.	pamac@smorfland.uni.wroc.pl	Baca, Mateusz/ABG-8020-2020; Marciszak, Adrian/F-4093-2015; Stefaniak, Krzysztof/AAJ-1644-2021; Popovic, Danijela/KLZ-2534-2024	Stefaniak, Krzysztof/0000-0002-4116-7275; Popovic, Danijela/0000-0003-1025-3776; Marciszak, Adrian/0000-0002-1472-6553; Nadachowski, Adam/0000-0001-6452-3028; Baca, Mateusz/0000-0003-2174-3914	Polish National Science Centre [2012/07/B/NZ8/02845]; KNOW Consortium, Faculty of Biotechnology, University of Wroclaw	Polish National Science Centre; KNOW Consortium, Faculty of Biotechnology, University of Wroclaw	This paper is dedicated to the memory of the late Ana Stankovic, an excellent paleogeneticist and the best friend of ours, who tragically passed away in her prime but remains forever in our hearts. We are very grateful to Bogdan Ridush for the helpful discussion about cave bears in Ukraine and to Marcelo Rivadeneira for his useful remarks about the estimation of extinction time. This work was sup…	151	55	58	5	52	SPRINGER HEIDELBERG	HEIDELBERG	TIERGARTENSTRASSE 17, D-69121 HEIDELBERG, GERMANY	0028-1042	1432-1904		SCI NAT-HEIDELBERG	Sci. Nat.	DEC	2016	103	2025-12-11			92	10.1007/s00114-016-1414-8	http://dx.doi.org/10.1007/s00114-016-1414-8			17
J	Bakker, ES; Gill, JL; Johnson, CN; Vera, FWM; Sandom, CJ; Asner, GP; Svenning, JC	Bakker, Elisabeth S.; Gill, Jacquelyn L.; Johnson, Christopher N.; Vera, Frans W. M.; Sandom, Christopher J.; Asner, Gregory P.; Svenning, Jens-Christian							Combining paleo-data and modern exclosure experiments to assess the impact of megafauna extinctions on woody vegetation	Proceedings of the National Academy of Sciences of the United States of America	English	Article	browsers; ecosystem functions; herbivore diversity; landscape structure; megaherbivore	Bialowieza primeval forest; Late Quaternary extinctions; national park; plant-communities; mammoth steppe; boreal forests; Isle Royale; bottom-up; ice age; herbivore	Until recently in Earth history, very large herbivores (mammoths, ground sloths, diprotodons, and many others) occurred in most of the World's terrestrial ecosystems, but the majority have gone extinct as part of the late-Quaternary extinctions. How has this large-scale removal of large herbivores affected landscape structure and ecosystem functioning? In this review, we combine paleo-data with i…	[Bakker, Elisabeth S.] Netherlands Inst Ecol, Dept Aquat Ecol, NL-6708 PB Wageningen, Netherlands; [Gill, Jacquelyn L.] Univ Maine, Climate Change Inst, Sch Biol & Ecol, Orono, ME 04469 USA; [Johnson, Christopher N.] Univ Tasmania, Sch Biol Sci, Hobart, Tas 7001, Australia; [Vera, Frans W. M.] Univ Groningen, Inst Evolutionary Life Sci, Community & Conservat Ecol, NL-9700 CC Groningen, Netherland…	Royal Netherlands Academy of Arts & Sciences; Netherlands Institute of Ecology (NIOO-KNAW); University of Maine System; University of Maine Orono; University of Tasmania; University of Groningen; University of Oxford; Carnegie Institution for Science; Aarhus University	Bakker, ES (corresponding author), Netherlands Inst Ecol, Dept Aquat Ecol, NL-6708 PB Wageningen, Netherlands.	l.bakker@nioo.knaw.nl	Gill, Jacquelyn/HCH-8486-2022; Sandom, Christopher/AFU-2959-2022; Johnson, Chris/J-7894-2014; KNAW, NIOO-KNAW/A-4320-2012; Svenning, Jens-Christian/C-8977-2012; Bakker, Elisabeth/B-7185-2008; Asner, Gregory/G-9268-2013	Gill, Jacquelyn/0000-0003-0003-6620; Johnson, Chris/0000-0002-9719-3771; KNAW, NIOO-KNAW/0000-0002-3835-159X; Svenning, Jens-Christian/0000-0002-3415-0862; Bakker, Elisabeth/0000-0002-5900-9136; Asner, Gregory/0000-0001-7893-6421	European Research Council [ERC-2012-StG-310886-HISTFUNC]	European Research Council(European Research Council (ERC))	We thank the people who set up and maintain the exclosure in Yellowstone National Park that we photographed as illustration in Fig. 1E. J.-C.S. was supported by European Research Council Grant ERC-2012-StG-310886-HISTFUNC. We additionally consider this article a contribution to the Danish National Research Foundation Niels Bohr Professorship Project Aarhus University Research on the Anthropocene.…	123	236	261	4	205	NATL ACAD SCIENCES	WASHINGTON	2101 CONSTITUTION AVE NW, WASHINGTON, DC 20418 USA	0027-8424			P NATL ACAD SCI USA	Proc. Natl. Acad. Sci. U. S. A.	2026-01-01	2016	113	4	847	855		10.1073/pnas.1502545112	http://dx.doi.org/10.1073/pnas.1502545112			9
J	Bampi, H; Barberi, M; Lima-Ribeiro, MS	Bampi, Hugo; Barberi, Maira; Lima-Ribeiro, Matheus S.							Megafauna kill sites in South America: A critical review	Quaternary Science Reviews	English	Review	Quaternary; Late Quaternary extinctions; human-megafauna interaction; human impact; overkill; kill site; extinct mammals; South America	Monte Verde; hunter-gatherers; climate change; Pleistocene; extinction; occupation; discovery; antiquity; Chile; coast	South America is the continent with the largest amount of megafauna extinctions at the end of the Pleistocene (similar to 50 genera), but the empirical evidence of megafauna exploitation by humans is little known by the international scientific community and often ignored from systematic reviews of global megafauna extinctions. Here, we systematically searched for archaeological records with huma…	[Bampi, Hugo; Lima-Ribeiro, Matheus S.] Univ Fed Goias, Dept Ecol, Programa Posgrad Ecol & Evolucao, Goiania, GO, Brazil; [Bampi, Hugo; Lima-Ribeiro, Matheus S.] Univ Fed Jatai, Lab Macroecol, Cx Postal 03, BR-75804020 Jatai, GO, Brazil; [Barberi, Maira] Pontificia Univ Catolica Goias, Lab Paleoecol, Goiania, GO, Brazil	Universidade Federal de Goias; Pontificia Universidade Catolica de Goias	Bampi, H (corresponding author), Univ Fed Goias, Dept Ecol, Programa Posgrad Ecol & Evolucao, Goiania, GO, Brazil.	hugobampi@gmail.com	BARBERI, MAIRA/GNP-0976-2022; Bampi, Hugo/HHM-5410-2022; Lima-Ribeiro, Matheus/H-9503-2014	Lima-Ribeiro, Matheus/0000-0002-3322-1702; BAMPI, HUGO/0000-0001-7504-9894	National Institutes for Science and Technology (INCT) in Ecology, Evolution and Biodiversity Conservation; MCTIC/CNPq [465610/2014-5]; FAPEG [201810267000023]; National Council for Scienti fic and Technological Development (CNPq) [132997/2020-7]; Coordination for the Improvement of Higher Education Personnel (CAPES) [88887.596963/2021-0 0]	National Institutes for Science and Technology (INCT) in Ecology, Evolution and Biodiversity Conservation; MCTIC/CNPq(Conselho Nacional de Desenvolvimento Cientifico e Tecnologico (CNPQ)); FAPEG(Fundacao de Amparo a Pesquisa do Estado do Goias (FAPEG)); National Council for Scienti fic and Technological Development (CNPq)(Conselho Nacional de Desenvolvimento Cientifico e Tecnologico (CNPQ)); Coor…	This paper is a contribution of the National Institutes for Science and Technology (INCT) in Ecology, Evolution and Biodiversity Conservation, supported by MCTIC/CNPq (proc. 465610/2014-5) and FAPEG (proc. 201810267000023) . HB and MSL-R received support from the National Council for Scienti fic and Technological Development (CNPq grants no. 380167/2019-0 and 301514/2019-4, respectively) . HB tha…	77	10	11	7	26	PERGAMON-ELSEVIER SCIENCE LTD	OXFORD	THE BOULEVARD, LANGFORD LANE, KIDLINGTON, OXFORD OX5 1GB, ENGLAND	0277-3791	1873-457X		QUATERNARY SCI REV	Quat. Sci. Rev.	2015-12-01	2022	298				107851	10.1016/j.quascirev.2022.107851	http://dx.doi.org/10.1016/j.quascirev.2022.107851		2022-11-01	12
J	Bampi, H; Pires-Oliveira, JC; Loyola-Bartra, O; Lima-Ribeiro, MS	Bampi, Hugo; Pires-Oliveira, Joao Carlos; Loyola-Bartra, Omar; Lima-Ribeiro, Matheus S.							Language bias, not knowledge shortfall, underestimates the evidence of megafauna kill sites in South America	Journal of South American Earth Sciences	English	Article	Late Quaternary extinctions; human-megafauna interaction; New World; publication bias; scientific impact	Late Pleistocene; extinction; mammoth; Clovis; variability; calibration; occupation; overkill; English; state	The Megafauna Kill Sites (MKS), with irrefutable empirical evidence of human-megafauna interactions over the late Quaternary, have widely been recognized in North America and historically overlooked in South America. Here, we systematically reviewed the MKS from the Americas and showed that the neglected evidence from South American MKS is as robust as or even more robust, in both quantity and qu…	[Bampi, Hugo; Pires-Oliveira, Joao Carlos; Lima-Ribeiro, Matheus S.] Natl Inst Sci & Technol INCT, Ecol Evolut & Biodivers Conservat, Goiania, GO, Brazil; [Bampi, Hugo] Univ Fed Goias, Postgrad Programin Ecol & Evolut, Goiania, GO, Brazil; [Pires-Oliveira, Joao Carlos] Mato Grosso State Univ, Fac Biol & Agr Sci, Ecol Lab, Alta Floresta, MG, Brazil; [Loyola-Bartra, Omar] Univ Fed Mato Grosso, Inst…	Universidade Federal de Goias; Universidade do Estado de Mato Grosso; Universidade Federal de Mato Grosso	Bampi, H (corresponding author), Natl Inst Sci & Technol INCT, Ecol Evolut & Biodivers Conservat, Goiania, GO, Brazil.	hugobampi@gmail.com	Pires de Oliveira, João/JBS-0399-2023; Bampi, Hugo/HHM-5410-2022	BAMPI, HUGO/0000-0001-7504-9894	National Institute of Science, Technology and Innovation (INCT) in Ecology, Evolution and Biodiversity Conservation; MCTIC/CNPq [465610/2014-5]; FAPEG [201810267000023]; National Council for Scientific and Technological Development [CNPq] [380167/2019-0, 141754/2020-6, 301514/2019-4]; Master scholarship by the National Council for Scientific and Technological Development [CNPq] [132997/2020-7]; C…	National Institute of Science, Technology and Innovation (INCT) in Ecology, Evolution and Biodiversity Conservation; MCTIC/CNPq(Conselho Nacional de Desenvolvimento Cientifico e Tecnologico (CNPQ)); FAPEG(Fundacao de Amparo a Pesquisa do Estado do Goias (FAPEG)); National Council for Scientific and Technological Development [CNPq](Conselho Nacional de Desenvolvimento Cientifico e Tecnologico (CNP…	This paper was supported by the National Institute of Science, Technology and Innovation (INCT) in Ecology, Evolution and Biodiversity Conservation, supported by MCTIC/CNPq [process number 465610/2014-5] and FAPEG [process number 201810267000023] . HB, OLB, and ML-R received support from the National Council for Scientific and Technological Development [CNPq process number 380167/2019-0, 141754/2…	76	0	0	0	0	PERGAMON-ELSEVIER SCIENCE LTD	OXFORD	THE BOULEVARD, LANGFORD LANE, KIDLINGTON, OXFORD OX5 1GB, ENGLAND	0895-9811	1873-0647		J S AM EARTH SCI	J. South Am. Earth Sci.	2015-10-01	2024	146				105078	10.1016/j.jsames.2024.105078	http://dx.doi.org/10.1016/j.jsames.2024.105078		2024-08-01	10
J	Barnett, R; Westbury, MV; Sandoval-Velasco, M; Vieira, FG; Jeon, S; Zazula, G; Martin, MD; Ho, SYW; Mather, N; Gopalakrishnan, S; Ramos-Madrigal, J; de Manuel, M; Zepeda-Mendoza, ML; Antunes, A; Baez, AC; De Cahsan, B; Larson, G; O'Brien, SJ; Eizirik, E; Johnson, WE; Koepfli, KP; Wilting, A; Fickel, J; Dalén, L; Lorenzen, ED; Marques-Bonet, T; Hansen, AJ; Zhang, GJ; Bhak, J; Yamaguchi, N; Gilbert…	Barnett, Ross; Westbury, Michael V.; Sandoval-Velasco, Marcela; Vieira, Filipe Garrett; Jeon, Sungwon; Zazula, Grant; Martin, Michael D.; Ho, Simon Y. W.; Mather, Niklas; Gopalakrishnan, Shyam; Ramos-Madrigal, Jazmin; de Manuel, Marc; Zepeda-Mendoza, M. Lisandra; Antunes, Agostinho; Baez, Aldo Carmona; De Cahsan, Binia; Larson, Greger; O'Brien, Stephen J.; Eizirik, Eduardo; Johnson, Warren E.; Ko…							Genomic Adaptations and Evolutionary History of the Extinct Scimitar-Toothed Cat, Homotherium latidens	Current Biology	English	Article		phylogenetic analysis; ancient; Pleistocene; identification; relevance; alignment	Homotherium was a genus of large-bodied scimitar-toothed cats, morphologically distinct from any extant felid species, that went extinct at the end of the Pleistocene [1-4]. They possessed large, saber-form serrated canine teeth, powerful forelimbs, a sloping back, and an enlarged optic bulb, all of which were key characteristics for predation on Pleistocene megafauna [5]. Previous mitochondrial …	[Barnett, Ross; Westbury, Michael V.; Sandoval-Velasco, Marcela; Vieira, Filipe Garrett; Gopalakrishnan, Shyam; Ramos-Madrigal, Jazmin; Zepeda-Mendoza, M. Lisandra; Baez, Aldo Carmona; De Cahsan, Binia; Lorenzen, Eline D.; Gilbert, M. Thomas P.] Univ Copenhagen, GLOBE Inst, Sect Evolutionary Genom, Oster Voldgade 5-7, Copenhagen, Denmark; [Jeon, Sungwon; Bhak, Jong] Ulsan Natl Inst Sci & Technol …	University of Copenhagen; Ulsan National Institute of Science & Technology (UNIST); Ulsan National Institute of Science & Technology (UNIST); Norwegian University of Science & Technology (NTNU); University of Sydney; University of Copenhagen; Pompeu Fabra University; Consejo Superior de Investigaciones Cientificas (CSIC); CSIC-UPF - Institut de Biologia Evolutiva (IBE); University of Birmingham; …	Westbury, MV; Gilbert, MTP (corresponding author), Univ Copenhagen, GLOBE Inst, Sect Evolutionary Genom, Oster Voldgade 5-7, Copenhagen, Denmark.;Gilbert, MTP (corresponding author), Norwegian Univ Sci & Technol NTNU, NTNU Univ Museum, Dept Nat Hist, NO-7491 Trondheim, Norway.;Gilbert, MTP (corresponding author), Univ Copenhagen, GLOBE Inst, Ctr Evolutionary Hologen, Oster Farimagsgade 5A, DK-135…	m.westbury@sund.ku.dk; tgilbert@sund.ku.dk	Dalén, Love/A-6686-2008; Marques-Bonet, Tomas/ABF-3734-2020; Lorenzen, Eline/GRF-1592-2022; Yamaguchi, Nobuyuki/AAN-4884-2020; Ho, Simon/A-8417-2008; OBRIEN, STEPHEN/ABD-1346-2020; Sandoval-Velasco, Marcela/AAS-6478-2021; Zhang, Guojie/HCH-1880-2022; Wilting, Andreas/B-1644-2010; Koepfli, Klaus-Peter/AAT-9320-2020; Gopalakrishnan, Shyam/J-1546-2019; Johnson, Warren/D-4149-2016; Zhang, Guojie/J-72…	Antunes, Agostinho/0000-0002-1328-1732; Johnson, Warren/0000-0002-5954-186X; Zhang, Guojie/0000-0001-6860-1521; Ramos-Madrigal, Jazmin/0000-0002-1661-7991; Garrett Vieira, Filipe/0000-0002-8464-7770; Westbury, Michael/0000-0003-0478-3930; OBRIEN, STEPHEN/0000-0001-7857-0757; Sandoval-Velasco, Marcela/0000-0002-4635-6171; Gilbert, Marcus/0000-0002-5805-7195; Gopalakrishnan, Shyam/0000-0002-2004-68…				67	36	36	1	20	CELL PRESS	CAMBRIDGE	50 HAMPSHIRE ST, FLOOR 5, CAMBRIDGE, MA 02139 USA	0960-9822	1879-0445		CURR BIOL	Curr. Biol.	2021-12-01	2020	30	24			5018.e1	10.1016/j.cub.2020.09.051	http://dx.doi.org/10.1016/j.cub.2020.09.051			14
J	Barnosky, AD	Barnosky, Anthony D.							Megafauna biomass tradeoff as a driver of Quaternary and future extinctions	Proceedings of the National Academy of Sciences of the United States of America	English	Article	paleoecology; Pleistocene; mammal; ecological threshold	geographical range size; climate-change; body size; Pleistocene Australia; South America; ancient DNA; mammals; domestication; ecosystems; continents	Earth's most recent major extinction episode, the Quaternary Megafauna Extinction, claimed two-thirds of mammal genera and one-half of species that weighed > 44 kg between approximate to 50,000 and 3,000 years ago. Estimates of megafauna biomass (including humans as a megafauna species) for before, during, and after the extinction episode suggest that growth of human biomass largely matched the l…	[Barnosky, Anthony D.] Univ Calif Berkeley, Dept Integrat Biol, Berkeley, CA 94720 USA; [Barnosky, Anthony D.] Univ Calif Berkeley, Museum Paleontol, Berkeley, CA 94720 USA; [Barnosky, Anthony D.] Univ Calif Berkeley, Museum Vertebrate Zool, Berkeley, CA 94720 USA	University of California System; University of California Berkeley; University of California System; University of California Berkeley; University of California System; University of California Berkeley	Barnosky, AD (corresponding author), Univ Calif Berkeley, Dept Integrat Biol, Berkeley, CA 94720 USA.	barnosky@berkeley.edu			National Science Foundation [EAR-0720387, DEB-0543641]	National Science Foundation(National Science Foundation (NSF))	I thank Elizabeth A. Hadly and Pablo Marquet for discussions about these ideas; Claudio Latorre for discussions about extinctions in South America; and Paul Koch, Robert Feranec, and Alan Shabel for help in assembling information. Useful comments on the manuscript were supplied by John Avise, Jenny McGuire, Nick Pyenson, and two anonymous reviewers. This work was done under the auspices of the U.…	49	164	182	1	123	NATL ACAD SCIENCES	WASHINGTON	2101 CONSTITUTION AVE NW, WASHINGTON, DC 20418 USA	0027-8424			P NATL ACAD SCI USA	Proc. Natl. Acad. Sci. U. S. A.	2012-08-01	2008	105		11543	11548		10.1073/pnas.0801918105	http://dx.doi.org/10.1073/pnas.0801918105			6
J	Barnosky, AD; Koch, PL; Feranec, RS; Wing, SL; Shabel, AB	Barnosky, AD; Koch, PL; Feranec, RS; Wing, SL; Shabel, AB							Assessing the causes of Late Pleistocene extinctions on the continents	Science	English	Review		hemisphere ice sheets; Late Quaternary; megafaunal extinctions; Irish elk; mammalian extinctions; Wrangel-island; climate change; overkill; mammoths; record	One of the great debates about extinction is whether humans or climatic change caused the demise of the Pleistocene megafauna. Evidence from paleontology, climatology, archaeology, and ecology now supports the idea that humans contributed to extinction on some continents, but human hunting was not solely responsible for the pattern of extinction everywhere. instead, evidence suggests that the int…	Univ Calif Berkeley, Dept Integrat Biol, Berkeley, CA 94720 USA; Univ Calif Berkeley, Museum Paleontol, Berkeley, CA 94720 USA; Univ Calif Berkeley, Museum Vertebrate Zool, Berkeley, CA 94720 USA; Univ Calif Santa Cruz, Dept Earth Sci, Santa Cruz, CA 95064 USA; Smithsonian Inst, Natl Museum Nat Hist, Washington, DC 20560 USA	University of California System; University of California Berkeley; University of California System; University of California Berkeley; University of California System; University of California Berkeley; University of California System; University of California Santa Cruz; Smithsonian Institution; Smithsonian National Museum of Natural History	Univ Calif Berkeley, Dept Integrat Biol, Berkeley, CA 94720 USA.	barnosky@socrates.berkeley.edu	Wing, Scott/IYJ-5681-2023	Wing, Scott/0000-0002-2954-8905				90	707	816	44	1023	AMER ASSOC ADVANCEMENT SCIENCE	WASHINGTON	1200 NEW YORK AVE, NW, WASHINGTON, DC 20005 USA	0036-8075	1095-9203		SCIENCE	Science	2001-10-01	2004	306	5693	70	75		10.1126/science.1101476	http://dx.doi.org/10.1126/science.1101476			6
J	Barnosky, AD; Lindsey, EL	Barnosky, Anthony D.; Lindsey, Emily L.							Timing of Quaternary megafaunal extinction in South America in relation to human arrival and climate change	Quaternary International	English	Article		Gruta del Indio; Late Pleistocene; Australian megafauna; Early Holocene; human occupation; radiocarbon; Mammalia; Clovis; vegetation; Argentina	South America lost more genera in the Quaternary megafaunal extinction than any other continent, but how it fits into the worldwide extinction has been unclear largely due to the lack of chronological resolution. This work evaluated 138 published radiocarbon dates for megafauna and 402 published dates for early (>8000 BP) South American archaeological sites. A total of 93 megafauna dates for 15 g…	[Barnosky, Anthony D.; Lindsey, Emily L.] Univ Calif Berkeley, Dept Integrat Biol, Berkeley, CA 94720 USA; [Barnosky, Anthony D.; Lindsey, Emily L.] Univ Calif Berkeley, Museum Paleontol, Berkeley, CA 94720 USA; [Barnosky, Anthony D.] Univ Calif Berkeley, Museum Vertebrate Zool, Berkeley, CA 94720 USA	University of California System; University of California Berkeley; University of California System; University of California Berkeley; University of California System; University of California Berkeley	Barnosky, AD (corresponding author), Univ Calif Berkeley, Dept Integrat Biol, Berkeley, CA 94720 USA.	barnosky@berkeley.edu		Lindsey, Emily/0000-0003-0845-8545	National Science Foundation [EAR-0720387]; US-Chile Fulbright Program	National Science Foundation(National Science Foundation (NSF)); US-Chile Fulbright Program	We thank Nicholas J. Matzke for providing the scripts to produce Fig. 7, and Luis Borrero, Robert Feranec, Susumu Tomiya, Alex Hubbe, and Ascanio Rincon for reviewing the manuscript. Elizabeth Hadly, Claudio Latorre, Pablo Marquet, and Francisco Mena provided valuable discussions and pointed us towards relevant literature. C. Lay and M. Tomasz helped produce Fig. 1. National Science Foundation Gr…	112	196	225	1	131	PERGAMON-ELSEVIER SCIENCE LTD	OXFORD	THE BOULEVARD, LANGFORD LANE, KIDLINGTON, OXFORD OX5 1GB, ENGLAND	1040-6182	1873-4553		QUATERN INT	Quat. Int.	2015-04-01	2010	217	2025-02-01	10	29		10.1016/j.quaint.2009.11.017	http://dx.doi.org/10.1016/j.quaint.2009.11.017			20
J	Barnosky, AD; Lindsey, EL; Villavicencio, NA; Bostelmann, E; Hadly, EA; Wanket, J; Marshall, CR	Barnosky, Anthony D.; Lindsey, Emily L.; Villavicencio, Natalia A.; Bostelmann, Enrique; Hadly, Elizabeth A.; Wanket, James; Marshall, Charles R.							Variable impact of late-Quaternary megafaunal extinction in causing ecological state shifts in North and South America	Proceedings of the National Academy of Sciences of the United States of America	English	Article	megafauna; extinction; Quaternary; North America; South America	mammal diversity loss; C-14 yr BP; Late Pleistocene; climate-change; radiocarbon-dates; plant-communities; Shasta Country; defaunation; California; evolution	Loss of megafauna, an aspect of defaunation, can precipitate many ecological changes over short time scales. We examine whether megafauna loss can also explain features of lasting ecological state shifts that occurred as the Pleistocene gave way to the Holocene. We compare ecological impacts of late-Quaternarymegafauna extinction in five American regions: southwestern Patagonia, the Pampas, north…	[Barnosky, Anthony D.; Lindsey, Emily L.; Villavicencio, Natalia A.; Marshall, Charles R.] Univ Calif Berkeley, Dept Integrat Biol, Berkeley, CA 94720 USA; [Barnosky, Anthony D.; Lindsey, Emily L.; Villavicencio, Natalia A.; Marshall, Charles R.] Univ Calif Berkeley, Museum Paleontol, Berkeley, CA 94720 USA; [Barnosky, Anthony D.] Univ Calif Berkeley, Museum Vertebrate Zool, Berkeley, CA 94720 US…	University of California System; University of California Berkeley; University of California System; University of California Berkeley; University of California System; University of California Berkeley; Universidad de Chile; Stanford University; California State University System; California State University Sacramento; Universidad Austral de Chile	Barnosky, AD (corresponding author), Univ Calif Berkeley, Dept Integrat Biol, Berkeley, CA 94720 USA.;Barnosky, AD (corresponding author), Univ Calif Berkeley, Museum Paleontol, Berkeley, CA 94720 USA.;Barnosky, AD (corresponding author), Univ Calif Berkeley, Museum Vertebrate Zool, Berkeley, CA 94720 USA.	barnosky@berkeley.edu	Hay, Elizabeth/HKF-8621-2023	Bostelmann Torrealba, Juan Enrique/0000-0001-7939-8346; Lindsey, Emily/0000-0003-0845-8545; Villavicencio, Natalia A./0000-0001-8453-1914	National Science Foundation Earth Sciences Grant [1148181]; Division Of Earth Sciences; Directorate For Geosciences [1148181] Funding Source: National Science Foundation	National Science Foundation Earth Sciences Grant; Division Of Earth Sciences; Directorate For Geosciences(National Science Foundation (NSF)NSF - Directorate for Geosciences (GEO))	We thank Y. Mahli and C. Doughty for inviting us to present this work. F. Martin and L. Borrero helped in assembling data from southern Patagonia. J. L. Prado provided a preprint of ref. 22. We appreciate discussions with R. Byrne, G. Politis, J. L. Prado, L. Avilla, and D. Mothe. This work was funded by National Science Foundation Earth Sciences Grant 1148181. This is University of California Mu…	75	97	118	0	89	NATL ACAD SCIENCES	WASHINGTON	2101 CONSTITUTION AVE NW, WASHINGTON, DC 20418 USA	0027-8424			P NATL ACAD SCI USA	Proc. Natl. Acad. Sci. U. S. A.	2026-01-01	2016	113	4	856	861		10.1073/pnas.1505295112	http://dx.doi.org/10.1073/pnas.1505295112			6
J	Beck, MW	Beck, MW							On discerning the cause of late Pleistocene megafaunal extinctions	Paleobiology	English	Article		rockshelter radiocarbon chronology; North-America; mammalian extinctions; Colorado Plateau; mountain goat; climate; Utah; Mammuthus; overkill	I examine the late Pleistocene megafaunal extinctions by testing the only extinction model with strong a priori predictions, the blitzkrieg model (Martin 1973; Mosimann and Martin 1975). I first test an assumption of the blitzkrieg and other extinction models that the megafaunal extinctions occurred in the terminal Wisconsin (12-10 Ka). This assumption has been disputed by Grayson (1989, 1991), b…	FLORIDA STATE UNIV, DEPT BIOL SCI, TALLAHASSEE, FL 32306 USA	State University System of Florida; Florida State University			Beck, Michael/AAB-2844-2019	Beck, Michael/0000-0002-5107-9973				92	32	41	10	133	CAMBRIDGE UNIV PRESS	NEW YORK	32 AVENUE OF THE AMERICAS, NEW YORK, NY 10013-2473 USA	0094-8373	1938-5331		PALEOBIOLOGY	Paleobiology	WIN	1996	22	1	91	103		10.1017/S0094837300016043	http://dx.doi.org/10.1017/S0094837300016043			13
J	Bellinzoni, JE; Valenzuela, LO; Bonini, RA; Fuchs, L; Gómez, GN; Steffan, PG; Prado, JL	Bellinzoni, Jonathan E.; Valenzuela, Luciano O.; Bonini, Ricardo A.; Fuchs, Louise; Gomez, Gustavo N.; Steffan, Pamela G.; Prado, Jose L.							An isotopic approach for assessing synergies among extinction drivers on Late Pleistocene megafauna in the Argentine Pampas	Journal of Archaeological Science-Reports	English	Article	Palaeoecology; South America; Stable isotope analyses; Mixing models; Isotopic niche	Stable isotopes; Pampean Region; Mammalian enamel; Fossil tooth; Bone; Carbonate; Oxygen; Phosphate; Bioapatite; Ecology	The extinction of megafauna in the Americas was among the most severe worldwide. In both North and South America, human hunting and the ecological effects of climate change were attributed as the leading causes of extinction. We hypothesize that megamammal populations were not adaptively vulnerable as has been proposed previously and that different megafauna species responded differently to clima…	[Bellinzoni, Jonathan E.; Bonini, Ricardo A.; Gomez, Gustavo N.; Steffan, Pamela G.; Prado, Jose L.] Univ Nacl Ctr Prov Buenos Aires FACSO UNICEN, Fac Ciencias Sociales Olavarria, Inst Invest Arqueol & Paleontol Cuaternario Pampea, Ave Valle 5737,B7400JWI, Olavarria, Buenos Aires, Argentina; [Valenzuela, Luciano O.] Univ Nacl del Ctr Prov Buenos Aires, Fac Ciencias Sociales Olavarria FACSO UNICEN…	Utrecht University	Bellinzoni, JE (corresponding author), Univ Nacl Ctr Prov Buenos Aires FACSO UNICEN, Fac Ciencias Sociales Olavarria, Inst Invest Arqueol & Paleontol Cuaternario Pampea, Ave Valle 5737,B7400JWI, Olavarria, Buenos Aires, Argentina.	jbellinzoni@soc.unicen.edu.ar			Agencia Nacional de Promocion Cientifica y Tecnica; Consejo Nacional de Investigaciones Cientificas y Tecnicas (CONICET) [PUE-0079]; [PID2021-126933NB-100]; [I-COOPB 20589]; [PICT 2019-03480]	Agencia Nacional de Promocion Cientifica y Tecnica(ANPCyT); Consejo Nacional de Investigaciones Cientificas y Tecnicas (CONICET)(Consejo Nacional de Investigaciones Cientificas y Tecnicas (CONICET)); ; ;	This work has been made possible thanks to the Research Projects PID2021-126933NB-100 and I-COOPB 20589 from Spain; as well as to the Agencia Nacional de Promocion Cientifica y Tecnica (Agencia I+D+i, PICT 2019-03480) , and the Consejo Nacional de Investigaciones Cientificas y Tecnicas (CONICET, PUE-0079) .	76	1	1	4	4	ELSEVIER	AMSTERDAM	RADARWEG 29, 1043 NX AMSTERDAM, NETHERLANDS	2352-409X			J ARCHAEOL SCI-REP	J. Archaeol. Sci.-Rep.	OCT	2024	58				104687	10.1016/j.jasrep.2024.104687	http://dx.doi.org/10.1016/j.jasrep.2024.104687		2024-07-01	13
J	Beltrame, MO; Cañal, V; Llano, C; Barberena, R	Ornela Beltrame, Maria; Canal, Victoria; Llano, Carina; Barberena, Ramiro							Macroparasites of megamammals: The case of a Pleistocene-Holocene extinct ground sloth from northwestern Patagonia, Argentina	Quaternary International	English	Article	paleoparasitology; microhistology; megaherbivores; Patagonia; coprolites		Sloths and ground sloths (Xenarthra: Tardigrada) are among the most conspicuous mammals in the Cenozoic faunas of South America. During the late Pleistocene and the early Holocene, all the megafaunal xenarthrans became extinct. While much attention has been paid to understanding the causes of megafauna extinction, less attention has been given to understanding the impacts of the loss of the megaf…	[Ornela Beltrame, Maria; Canal, Victoria] UNMdP, Fac Ciencias Exactas & Nat, Inst Invest Prod Sanidad & Ambiente IIPROSAM, Grp Invest Paleoparasit,CONICET, Juan B Justo 2250,CP 7600, Mar Del Plata, Buenos Aires, Argentina; [Ornela Beltrame, Maria; Llano, Carina; Barberena, Ramiro] Consejo Nacl Invest Cient & Tecn CONICET, Buenos Aires, DF, Argentina; [Llano, Carina] UNCUYO, Fac Ciencias Aplicadas…	Consejo Nacional de Investigaciones Cientificas y Tecnicas (CONICET); National University of Mar del Plata; Consejo Nacional de Investigaciones Cientificas y Tecnicas (CONICET)	Beltrame, MO (corresponding author), UNMdP, Fac Ciencias Exactas & Nat, Inst Invest Prod Sanidad & Ambiente IIPROSAM, Grp Invest Paleoparasit,CONICET, Juan B Justo 2250,CP 7600, Mar Del Plata, Buenos Aires, Argentina.	ornelabeltrame@conicet.gov.ar	; Barberena, Ramiro/K-1036-2018	Llano, Carina/0000-0003-2744-5133; Barberena, Ramiro/0000-0002-4323-1197	Agencia Nacional de Promocion Cientifica y Tecnologica [PICT 2016-0062, PICT 2016-0316]; (CONICET) from Argentina [PIP 301]	Agencia Nacional de Promocion Cientifica y Tecnologica(ANPCyTSpanish Government); (CONICET) from Argentina(Consejo Nacional de Investigaciones Cientificas y Tecnicas (CONICET))	This research was funded by the projects PICT 2016-0062, PICT 2016-0316 (Agencia Nacional de Promocion Cientifica y Tecnologica), and PIP 301 (CONICET) from Argentina. We acknowledge the collaboration of Carlos Cides and Claudia Della Negra, from the Direccion de Patrimonio, Ministerio de las Culturas, Provincia del Neuquen.	58	7	8	0	5	PERGAMON-ELSEVIER SCIENCE LTD	OXFORD	THE BOULEVARD, LANGFORD LANE, KIDLINGTON, OXFORD OX5 1GB, ENGLAND	1040-6182	1873-4553		QUATERN INT	Quat. Int.	2010-12-01	2020	568		36	42		10.1016/j.quaint.2020.09.030	http://dx.doi.org/10.1016/j.quaint.2020.09.030			7
J	Ben-Dor, M; Barkai, R	Ben-Dor, Miki; Barkai, Ran							Prey Size Decline as a Unifying Ecological Selecting Agent in Pleistocene Human Evolution	Quaternary	English	Article	human evolution; megafauna extinction; fat; domestication; human brain expansion; Paleolithic	mortality profiles; brain size; body size; middle; fire; Neanderthal; extinction; niche; diet; Homo	We hypothesize that megafauna extinctions throughout the Pleistocene, that led to a progressive decline in large prey availability, were a primary selecting agent in key evolutionary and cultural changes in human prehistory. The Pleistocene human past is characterized by a series of transformations that include the evolution of new physiological traits and the adoption, assimilation, and replacem…	[Ben-Dor, Miki; Barkai, Ran] Tel Aviv Univ, Dept Archaeol, IL-39040 Tel Aviv, Israel	Tel Aviv University	Ben-Dor, M; Barkai, R (corresponding author), Tel Aviv Univ, Dept Archaeol, IL-39040 Tel Aviv, Israel.	bendor.michael@gmail.com; barkaran@tauex.tau.ac.il	Barkai, Ran/L-6495-2019	Ben-Dor, Miki/0000-0001-9512-1160; BARKAI, RAN/0000-0002-8125-8788				165	16	16	0	9	MDPI	BASEL	ST ALBAN-ANLAGE 66, CH-4052 BASEL, SWITZERLAND	2571-550X			QUATERNARY	Quaternary	MAR	2021	4	1			7	10.3390/quat4010007	http://dx.doi.org/10.3390/quat4010007			21
J	Ben-Dor, M; Barkai, R	Ben-Dor, Miki; Barkai, Ran							A matter of fat: Hunting preferences affected Pleistocene megafaunal extinctions and human evolution	Quaternary Science Reviews	English	Article	megafauna extinction; human evolution; hunting; human behavior	bone marrow yields; niche construction; body size; carcass exploitation; hominin subsistence; Olduvai Gorge; Bed II; site; brain; Hadza	The longstanding debate over human contribution to Pleistocene megafauna extinctions motivates our examination of plausible hunting behaviors that may have impacted prey populations. Prey size declines during the Pleistocene have been proposed as a unifying selecting agent of human evolution. Here, we identify prey selection criteria and exploitation patterns that could have increased the extinct…	[Ben-Dor, Miki; Barkai, Ran] Tel Aviv Univ, Dept Archaeol, POB 39040, IL-69978 Tel Aviv, Israel	Tel Aviv University	Ben-Dor, M (corresponding author), Tel Aviv Univ, Dept Archaeol, POB 39040, IL-69978 Tel Aviv, Israel.	bendor.michael@gmail.com; barkaran205@gmail.com	Barkai, Ran/L-6495-2019	BARKAI, RAN/0000-0002-8125-8788; Ben-Dor, Miki/0000-0001-9512-1160				163	0	0	4	6	PERGAMON-ELSEVIER SCIENCE LTD	OXFORD	THE BOULEVARD, LANGFORD LANE, KIDLINGTON, OXFORD OX5 1GB, ENGLAND	0277-3791	1873-457X		QUATERNARY SCI REV	Quat. Sci. Rev.	2001-05-01	2024	331				108660	10.1016/j.quascirev.2024.108660	http://dx.doi.org/10.1016/j.quascirev.2024.108660		2024-04-01	10
J	Benfield, AJ; Ivory, SJ; Hodelka, BN; Zimmerman, SRH; McGlue, MM	Benfield, Adam J. J.; Ivory, Sarah J. J.; Hodelka, Bailee N. N.; Zimmerman, Susan R. H.; McGlue, Michael M. M.							Terrestrial ecosystem transformations in response to rapid climate change during the last deglaciation around Mono Lake, California, USA	Quaternary Research	English	Article	Sierra Nevada; Great Basin; Pleistocene; megafauna extinction; abrupt climate change; giant Sequoia	Central Sierra Nevada; enzyme based method; Late Pleistocene; Great Basin; vegetation change; high-resolution; modern pollen; North American; United States; pluvial lakes	We examine major reorganizations of the terrestrial ecosystem around Mono Lake, California during the last deglacial period from 16,000-9,000 cal yr BP using pollen, microcharcoal, and coprophilous fungal spores (Sporormiella) from a deep-water sediment core. The pollen results record the assemblage, decline, and replacement of a mixed wooded community of Sierran and Great Basin taxa with Alkali …	[Benfield, Adam J. J.; Ivory, Sarah J. J.] Penn State Univ, Dept Geosci, University Pk, PA 16802 USA; [Ivory, Sarah J. J.] Penn State Univ, Earth & Environm Syst Inst, University Pk, PA 16802 USA; [Hodelka, Bailee N. N.; McGlue, Michael M. M.] Univ Kentucky, Dept Earth & Environm Sci, Lexington, KY 40508 USA; [Zimmerman, Susan R. H.] Berkeley Geochronol Ctr, Berkeley, CA 94709 USA; [Zimmerman, Su…	Pennsylvania Commonwealth System of Higher Education (PCSHE); Pennsylvania State University; Pennsylvania State University - University Park; Pennsylvania Commonwealth System of Higher Education (PCSHE); Pennsylvania State University; Pennsylvania State University - University Park; University of Kentucky; Berkeley Geochronolgy Center; United States Department of Energy (DOE); Lawrence Livermore …	Benfield, AJ (corresponding author), Penn State Univ, Dept Geosci, University Pk, PA 16802 USA.	ajbenfield@psu.edu	Zimmerman, Susan/A-3351-2013	Benfield, Adam/0000-0002-2327-9724; Zimmerman, Susan/0000-0002-1320-1878				107	1	2	0	7	CAMBRIDGE UNIV PRESS	CAMBRIDGE	EDINBURGH BLDG, SHAFTESBURY RD, CB2 8RU CAMBRIDGE, ENGLAND	0033-5894	1096-0287		QUATERNARY RES	Quat. Res.	MAY	2023	113		87	104	PII S0033589422000709	10.1017/qua.2022.70	http://dx.doi.org/10.1017/qua.2022.70		2023-03-01	18
J	Berti, E; Svenning, JC	Berti, Emilio; Svenning, Jens-Christian							Megafauna extinctions have reduced biotic connectivity worldwide	Global Ecology and Biogeography	English	Article	connectivity; home range; Late Pleistocene extinctions; mammals; megafauna; rewilding	body size; home range; dispersal; Pleistocene; fragmentation; biodiversity; consequences; competition; diversity; migration	Aim Connectivity among ecosystems is necessary to sustain ecological processes that promote biodiversity, community stability and ecosystem resilience, such as organism and nutrient dispersal. Along with human land use and habitat fragmentation, connectivity can also be affected by faunal changes. Here, we address this issue by studying how human-driven late Quaternary extinctions and extirpation…	[Berti, Emilio; Svenning, Jens-Christian] Aarhus Univ, Dept Biol, Sect Ecoinformat & Biodivers, Ny Munkegade 114, DK-8000 Aarhus C, Denmark; [Berti, Emilio; Svenning, Jens-Christian] Aarhus Univ, Dept Biol, Ctr Biodivers Dynam Changing World BIOCHANGE, Aarhus C, Denmark	Aarhus University; Aarhus University	Berti, E (corresponding author), Aarhus Univ, Dept Biol, Sect Ecoinformat & Biodivers, Ny Munkegade 114, DK-8000 Aarhus C, Denmark.	emilio.berti@bio.au.dk	Berti, Emilio/AAD-3103-2021; Svenning, Jens-Christian/C-8977-2012	Svenning, Jens-Christian/0000-0002-3415-0862; Berti, Emilio/0000-0001-9286-011X	Villum Fonden [16549]; Carlsbergfondet [CF16-0005]	Villum Fonden(Villum Fonden); Carlsbergfondet(Carlsberg Foundation)	Villum Fonden, Grant/Award Number: 16549; Carlsbergfondet, Grant/Award Number: CF16-0005	78	25	25	7	111	WILEY	HOBOKEN	111 RIVER ST, HOBOKEN 07030-5774, NJ USA	1466-822X	1466-8238		GLOBAL ECOL BIOGEOGR	Glob. Ecol. Biogeogr.	DEC	2020	29	12	2131	2142		10.1111/geb.13182	http://dx.doi.org/10.1111/geb.13182		2020-09-01	12
J	Berzaghi, F; Bretagnolle, F; Durand-Bessart, C; Blake, S	Berzaghi, Fabio; Bretagnolle, Francois; Durand-Bessart, Clementine; Blake, Stephen							Megaherbivores modify forest structure and increase carbon stocks through multiple pathways	Proceedings of the National Academy of Sciences of the United States of America	English	Article	megafauna; plant animal interactions; carbon cycling; nature-based solutions; biogeochemical cycles	feeding behavior; national park; elephants; consequences; Pleistocene; herbivores; megafauna; regeneration; extinctions; mortality	Megaherbivores have pervasive ecological effects. In African rainforests, elephants can increase aboveground carbon, though the mechanisms are unclear. Here, we combine a large unpublished dataset of forest elephant feeding with published browsing preferences totaling nearly 200,000 records covering >800 plant species and with nutritional data for 145 species. Elephants increase carbon stocks by:…	[Berzaghi, Fabio] Lab Climate & Environm Sci LSCE, Unite Mixte Rech Commissariat Energie & Energies A, F-91190 Gif Sur Yvette, France; [Bretagnolle, Francois] Univ Bourgogne, Unite Mixte Rech Ctr, CNRS Biogeosci 6282, Natl Rech Sci, F-21000 Dijon, France; [Durand-Bessart, Clementine; Blake, Stephen] St Louis Univ, Dept Biol, St Louis, MO 63103 USA; [Blake, Stephen] Max Planck Inst Anim Behav, Dep…	Universite Paris Saclay; Universite de Bourgogne; Saint Louis University; Max Planck Society	Berzaghi, F (corresponding author), Lab Climate & Environm Sci LSCE, Unite Mixte Rech Commissariat Energie & Energies A, F-91190 Gif Sur Yvette, France.	fabe@unitus.it		Durand-Bessart, Clementine/0000-0001-9896-5078; blake, stephen/0000-0002-2220-1589; Francois, Bretagnolle/0000-0003-0164-840X; Berzaghi, Fabio/0000-0002-9139-8274	European Union [845265]; French Government; Marie Curie Actions (MSCA) [845265] Funding Source: Marie Curie Actions (MSCA)	European Union(European Union (EU)); French Government; Marie Curie Actions (MSCA)(Marie Curie Actions)	This work was supported by European Union's Horizon 2020 research and innovation program under the Marie Sklodowska-Curie grant #845265 and by the French Government allocation d'Aide au Retour a l'Emploi program (F.B.) .	51	21	22	9	24	NATL ACAD SCIENCES	WASHINGTON	2101 CONSTITUTION AVE NW, WASHINGTON, DC 20418 USA	0027-8424	1091-6490		P NATL ACAD SCI USA	Proc. Natl. Acad. Sci. U. S. A.	1931-01-01	2023	120	5			e2201832120	10.1073/pnas.2201832120	http://dx.doi.org/10.1073/pnas.2201832120			12
J	Bird, MI; Hutley, LB; Lawes, MJ; Lloyd, J; Luly, JG; Ridd, PV; Roberts, RG; Ulm, S; Wurster, CM	Bird, Michael I.; Hutley, Lindsay B.; Lawes, Michael J.; Lloyd, Jon; Luly, Jon G.; Ridd, Peter V.; Roberts, Richard G.; Ulm, Sean; Wurster, Christopher M.							Humans, megafauna and environmental change in tropical Australia	Journal of Quaternary Science	English	Review	human impact; megafaunal extinction; tropical palaeoclimate; fire regime; ecosystem change	Late Quaternary extinctions; dominated woodland savanna; Pleistocene climate change; early archaeological site; northeastern Australia; rain forest invasion; western Arnhem Land; human occupation; summer monsoon; human colonization	Debate concerning the environmental impact of human arrival in Australia has continued for more than a century. Here we review the evidence for human impact and the mechanisms by which humans may have affected the environment of tropical Australia. We limit our review to tropical Australia because, over three decades ago, it was proposed that the imposition of an anthropogenic fire regime upon hu…	[Bird, Michael I.; Lloyd, Jon; Wurster, Christopher M.] James Cook Univ, Sch Earth & Environm Sci, Cairns, Qld, Australia; [Bird, Michael I.; Lloyd, Jon; Luly, Jon G.; Ulm, Sean; Wurster, Christopher M.] James Cook Univ, Ctr Trop Environm & Sustainabil Sci, Cairns, Qld, Australia; [Hutley, Lindsay B.; Lawes, Michael J.] Charles Darwin Univ, Sch Environm, Res Inst Environm & Livelihoods, Darwin, N…	James Cook University; James Cook University; Charles Darwin University; James Cook University; James Cook University; University of Wollongong; University of Wollongong; James Cook University; University of Leeds	Bird, MI (corresponding author), James Cook Univ, Sch Earth & Environm Sci, Cairns, Qld, Australia.	michael.bird@jcu.edu.au	Wurster, Christopher/A-1983-2011; Ridd, Peter/M-5871-2014; Roberts, Richard/B-8245-2013; Luly, Jon/K-6731-2012; Ulm, Sean/A-3854-2010; Lloyd, Jonathan/F-8893-2010; Lawes, Michael/N-2132-2013; Hutley, Lindsay/A-7925-2011; Bird, Michael/G-5364-2010	Roberts, Richard G./0000-0002-0128-4119; Ulm, Sean/0000-0001-6653-9963; Lloyd, Jonathan/0000-0002-5458-9960; Lawes, Michael/0000-0002-2381-6147; Hutley, Lindsay/0000-0001-5533-9886; Wurster, Christopher/0000-0002-2866-5798; Bird, Michael/0000-0003-1801-8703	Innovative Research Universities of Australia grouping; Australia Research Council [FF0883221, DP130100334, FT120100656]; Australian Research Council [FF0883221] Funding Source: Australian Research Council	Innovative Research Universities of Australia grouping; Australia Research Council(Australian Research Council); Australian Research Council(Australian Research Council)	This work was supported by a seed grant from the Innovative Research Universities of Australia grouping and Australia Research Council grants FF0883221, DP130100334 and FT120100656. We thank Professor Chris Johnson and an anonymous reviewer for thoughtful reviews of the manuscript.	190	39	43	1	193	WILEY	HOBOKEN	111 RIVER ST, HOBOKEN 07030-5774, NJ USA	0267-8179	1099-1417		J QUATERNARY SCI	J. Quat. Sci.	JUL	2013	28	5	439	452		10.1002/jqs.2639	http://dx.doi.org/10.1002/jqs.2639			14
J	Block, S; Saltré, F; Rodríguez-Rey, M; Fordham, DA; Unkel, I; Bradshaw, CJA	Block, Sebastian; Saltre, Frederik; Rodriguez-Rey, Marta; Fordham, Damien A.; Unkel, Ingmar; Bradshaw, Corey J. A.							Where to Dig for Fossils: Combining Climate-Envelope, Taphonomy and Discovery Models	Plos ONE	English	Article		species distribution; sample size; prediction; Pleistocene; performance; extinction; absences; quality; GIS	Fossils represent invaluable data to reconstruct the past history of life, yet fossil-rich sites are often rare and difficult to find. The traditional fossil-hunting approach focuses on small areas and has not yet taken advantage of modelling techniques commonly used in ecology to account for an organism's past distributions. We propose a new method to assist finding fossils at continental scales…	[Block, Sebastian; Saltre, Frederik; Rodriguez-Rey, Marta; Fordham, Damien A.; Bradshaw, Corey J. A.] Univ Adelaide, Inst Environm, Adelaide, SA, Australia; [Block, Sebastian; Saltre, Frederik; Rodriguez-Rey, Marta; Fordham, Damien A.; Bradshaw, Corey J. A.] Univ Adelaide, Sch Biol Sci, Adelaide, SA, Australia; [Block, Sebastian; Unkel, Ingmar] Univ Kiel, Inst Ecosyst Res, Kiel, Schleswig Holst, …	University of Adelaide; University of Adelaide; University of Kiel; Swansea University	Block, S (corresponding author), Univ Adelaide, Inst Environm, Adelaide, SA, Australia.;Block, S (corresponding author), Univ Adelaide, Sch Biol Sci, Adelaide, SA, Australia.;Block, S (corresponding author), Univ Kiel, Inst Ecosyst Res, Kiel, Schleswig Holst, Germany.	seblun@gmail.com	Block, Sebastian/AAH-3649-2020; Rodríguez-Rey, Marta/AGG-5129-2022; Saltre, Frederik/I-4961-2012; Bradshaw, Corey/A-1311-2008; Fordham, Damien/E-9255-2013	Rodriguez-Rey, Marta/0000-0002-4513-4438; Unkel, Ingmar/0000-0002-8940-1657; Block, Sebastian/0000-0002-4208-6653; Saltre, Frederik/0000-0002-5040-3911; Bradshaw, Corey/0000-0002-5328-7741; Fordham, Damien/0000-0003-2137-5592	European Commission [FPA 2023-0224 / 532524-1-FR-2012-1-ERA MUNDUS-EMMC]; Australian Research Council (ARC) [DP130103842]; CJAB [FT110100306]; DAF [FT140101192]	European Commission(European Union (EU)European Commission Joint Research Centre); Australian Research Council (ARC)(Australian Research Council); CJAB; DAF	SB was financially supported by the European Commission through the program Erasmus Mundus Master Course-International Master in Applied Ecology (EMMC-IMAE) (FPA 2023-0224 / 532524-1-FR-2012-1-ERA MUNDUS-EMMC; http://eacea.ec.europa.eu/erasmus_mundus/). The Australian Research Council (ARC; http://www.arc.gov.au/) supported FS, MRR (DP130103842) and CJAB & DAF (FT110100306 and FT140101192, respec…	57	13	14	0	12	PUBLIC LIBRARY SCIENCE	SAN FRANCISCO	1160 BATTERY STREET, STE 100, SAN FRANCISCO, CA 94111 USA	1932-6203			PLOS ONE	PLoS One	1930-03-01	2016	11	3			e0151090	10.1371/journal.pone.0151090	http://dx.doi.org/10.1371/journal.pone.0151090			16
J	Bocherens, H	Bocherens, Herve							The Rise of the Anthroposphere since 50,000 Years: An Ecological Replacement of Megaherbivores by Humans in Terrestrial Ecosystems?	Frontiers in Ecology and Evolution	English	Article	megaherbivores; terrestrial biomes; Neolithic; ecological replacement; extinction	Late Pleistocene; megafauna extinctions; feeding ecology; impacts; methane; agriculture; vegetation; elephant; mammals; Europe	Megaherbivores fulfilled a number of important ecological functions in terrestrial ecosystems and behaved as ecological engineers since 300 million years until around 12,000 years ago. These essential ecological functions include opening vegetation cover, selective seed dispersal and nutrient recycling and spreading. Thanks to these effects, megaherbivores change the vegetation structure where th…	[Bocherens, Herve] Univ Tubingen, Dept Geosci, Biogeol, Tubingen, Germany; [Bocherens, Herve] Univ Tubingen, Senckenberg Res Ctr Human Evolut & Palaeoenviron, Tubingen, Germany	Eberhard Karls University of Tubingen; Eberhard Karls University of Tubingen	Bocherens, H (corresponding author), Univ Tubingen, Dept Geosci, Biogeol, Tubingen, Germany.;Bocherens, H (corresponding author), Univ Tubingen, Senckenberg Res Ctr Human Evolut & Palaeoenviron, Tubingen, Germany.	herve.bocherens@uni-tuebingen.de	BOCHERENS, Herve/F-3580-2011	BOCHERENS, Herve/0000-0002-0494-0126				111	30	31	3	31	FRONTIERS MEDIA SA	LAUSANNE	AVENUE DU TRIBUNAL FEDERAL 34, LAUSANNE, CH-1015, SWITZERLAND	2296-701X			FRONT ECOL EVOL	Front. Ecol. Evol.	2024-01-01	2018	6				3	10.3389/fevo.2018.00003	http://dx.doi.org/10.3389/fevo.2018.00003			8
J	Boeskorov, GG	Boeskorov, GG							The north of Eastern Siberia: Refuge of Mammoth fauna in the Holocene	Gondwana Research	English	Article	Eastern Siberia; Yakutia; mammoth fauna; Late Pleistocene; Holocene		The global climate changings at the end of Pleistocene led to extinction of the typical representatives of Mammoth fauna-mammoth, woolly rhinoceros, wild horse, bison, muskox, cave lion, etc-on the huge territories of Northern Eurasia. Undoubtedly the Mammoth fauna underwent pressure from the Upper Paleolithic Man, whose hunting activity also could play the role in decreasing the number of mammot…	Mammoth Museum, Yakutsk 677891, Russia		Mammoth Museum, Lenina Prospekt 39, Yakutsk 677891, Russia.	a.g.ponomarev@ibpc.ysn.ru	Boeskorov, Gennady/J-7780-2018	Boeskorov, Gennady/0000-0002-2360-7740				33	8	9	3	21	ELSEVIER	AMSTERDAM	RADARWEG 29, 1043 NX AMSTERDAM, NETHERLANDS	1342-937X	1878-0571		GONDWANA RES	Gondwana Res.	APR	2004	7	2				10.1016/S1342-937X(05)70796-6	http://dx.doi.org/10.1016/S1342-937X(05)70796-6			5
J	Boeskorov, GG	Boeskorov, GG							Arctic Siberia: refuge of the Mammoth fauna in the Holocene	Quaternary International	English	Article; Proceedings Paper			Global climate change at the end of Pleistocene led to extinction in the huge territories of Northern Eurasia of the typical representatives of the Mammoth fauna: mammoth, woolly rhinoceros, wild horse, bison, musk-ox, and cave lion. Undoubtedly the Mammoth fauna underwent pressure from Upper Paleolithic humans, whose hunting activity could also have played a role in decreasing the number of mamm…	Mammoth Museum, Yakutsk 677891, Russia		Mammoth Museum, Lenina Prospekt 39, Yakutsk 677891, Russia.	a.g.ponomarev@ibpc.ysn.ru	Boeskorov, Gennady/J-7780-2018	Boeskorov, Gennady/0000-0002-2360-7740				34	29	32	5	30	PERGAMON-ELSEVIER SCIENCE LTD	OXFORD	THE BOULEVARD, LANGFORD LANE, KIDLINGTON, OXFORD OX5 1GB, ENGLAND	1040-6182	1873-4553		QUATERN INT	Quat. Int.	JAN	2006	142		119	123		10.1016/j.quaint.2005.03.009	http://dx.doi.org/10.1016/j.quaint.2005.03.009			5
J	Boeskorov, GG; Potapova, OR; Protopopov, AV; Plotnikov, VV; Agenbroad, LD; Kirikov, KS; Pavlov, IS; Shchelchkova, MV; Belolyubskii, IN; Tomshin, MD; Kowalczyk, R; Davydov, SP; Kolesov, SD; Tikhonov, AN; van der Plicht, J	Boeskorov, Gennady G.; Potapova, Olga R.; Protopopov, Albert V.; Plotnikov, Valery V.; Agenbroad, Larry D.; Kirikov, Konstantin S.; Pavlov, Innokenty S.; Shchelchkova, Marina V.; Belolyubskii, Innocenty N.; Tomshin, Mikhail D.; Kowalczyk, Rafal; Davydov, Sergey P.; Kolesov, Stanislav D.; Tikhonov, Alexey N.; van der Plicht, Johannes							The Yukagir Bison: The exterior morphology of a complete frozen mummy of the extinct steppe bison, Bison priscus from the early Holocene of northern Yakutia, Russia	Quaternary International	English	Article; Proceedings Paper	Steppe bison; frozen corpse; Yakutia; Holocene; morphology	climate change; genome; age	The paper presents analyses of the exterior morphology of one of the extinct and dominating species of the Late Pleistocene megafauna of Eurasia, the steppe bison, Bison priscus. The frozen mummy of the Yukagir Bison found in northern Yakutia, Russia represents the most complete specimen of this species in the world. It belongs to a young, 4.1-4.5 year old male, which dates back about 10,500 cal …	[Boeskorov, Gennady G.; Belolyubskii, Innocenty N.; Tomshin, Mikhail D.] Russian Acad Sci DPMGIRAS, Siberian Branch, Diamond & Precious Met Geol Inst, 39 Prospect Lenina, Yakutsk 677980, Russia; [Boeskorov, Gennady G.; Protopopov, Albert V.; Plotnikov, Valery V.; Pavlov, Innokenty S.; Kolesov, Stanislav D.] Yakutian Acad Sci, 39 Prospect Lenina, Yakutsk 677007, Russia; [Boeskorov, Gennady G.; Shc…	Diamond & Precious Metal Geology Institute Siberian Branch of Russian Academy of Sciences; North-Eastern Federal University in Yakutsk; Polish Academy of Sciences; Mammal Research Institute of the Polish Academy of Sciences; Pacific Geographical Institute of the Far Eastern Branch of the Russian Academy of Sciences; Russian Academy of Sciences; Zoological Institute of the Russian Academy of Scien…	Boeskorov, GG (corresponding author), Russian Acad Sci DPMGIRAS, Siberian Branch, Diamond & Precious Met Geol Inst, 39 Prospect Lenina, Yakutsk 677980, Russia.	gboeskorov@mail.ru	Tikhonov, Alexei/G-7478-2016; Протопопов, Альберт/AAV-1909-2021; Tomshin, Mikhail/AAO-2284-2020; Davydov, Sergei/S-9906-2018; Shchelchkova, Marina/HJH-3275-2023; Boeskorov, Gennady/J-7780-2018; Potapova, Olga/HNC-4473-2023	Tomshin, Mikhail/0000-0001-5865-7521; Davydov, Sergei/0000-0003-0820-9426; Shchelchkova, Marina/0000-0002-4566-3487; Kolesov, Stanislav/0000-0003-4632-8813; Kowalczyk, Rafal/0000-0001-7264-2158; Boeskorov, Gennady/0000-0002-2360-7740; Potapova, Olga/0000-0002-3589-2489; Tikhonov, Alexei/0000-0002-7227-5797	Yakutian (Sakha) Academy of Sciences; Mammoth Site of Hot Springs, SD; Russian Academy of Sciences	Yakutian (Sakha) Academy of Sciences; Mammoth Site of Hot Springs, SD; Russian Academy of Sciences(Russian Academy of Sciences)	This study was supported by the research organizations of Yakutian (Sakha) Academy of Sciences, Mammoth Site of Hot Springs, SD, and Russian Academy of Sciences. The authors are thankful to Dr. Daniel Fisher (University of Michigan, Arbor, MI) for facilitating of the samples AMS dating, Julie Mossman (Hot Springs, SD) for the text editing, Jeff Martin (The University of Maine, ME, USA) for provid…	106	22	25	1	26	PERGAMON-ELSEVIER SCIENCE LTD	OXFORD	THE BOULEVARD, LANGFORD LANE, KIDLINGTON, OXFORD OX5 1GB, ENGLAND	1040-6182	1873-4553		QUATERN INT	Quat. Int.	2025-06-01	2016	406		94	110		10.1016/j.quaint.2015.11.084	http://dx.doi.org/10.1016/j.quaint.2015.11.084			17
J	Bogan, S; Agnolin, FL; Cenizo, M; Tassara, D; Giacchino, A	Bogan, Sergio; Agnolin, Federico L.; Cenizo, Marcos; Tassara, Daniel; Giacchino, Adrian							A Pleistocene freshwater ichthyofaunal assemblage from central Argentina: What kind of fishes lived in the Pampean lagoons before the extinction of the megafauna?	Plos ONE	English	Article		Buenos Aires Province; Monte Hermoso Formation; Silversides teleostei; Brazilian subregion; Middle Pleistocene; southern Pampas; Early Pliocene; Early Holocene; Siluriformes; record	This study contributes to the knowledge of continental fishes recovered from sedimentary successions corresponding to the Bonaerean Stage/Age (late mid-Pleistocene) in the locality of Centinela del Mar, General Alvarado County, Buenos Aires province, Argentina. At this site we describe fossil fishes from a palaeolagoon, includingCorydorassp.,Pimelodellasp.,Rhamdiasp.,Oligosarcussp., small undeter…	[Bogan, Sergio; Agnolin, Federico L.; Cenizo, Marcos; Giacchino, Adrian] Univ Maimonides, Fdn Hist Nat Felix de Azara, Ctr Ciencias Nat Ambientales & Antropol, Buenos Aires, DF, Argentina; [Agnolin, Federico L.] Museo Argentino Ciencias Nat Bernardino Rivadavia, Lab Anat Comparada & Evoluc Vertebrados, Buenos Aires, DF, Argentina; [Agnolin, Federico L.] Consejo Nacl Invest Cient & Tecn, Buenos Ai…	Museo Argentino de Ciencias Naturales Bernardino Rivadavia (MACN); Consejo Nacional de Investigaciones Cientificas y Tecnicas (CONICET)	Bogan, S (corresponding author), Univ Maimonides, Fdn Hist Nat Felix de Azara, Ctr Ciencias Nat Ambientales & Antropol, Buenos Aires, DF, Argentina.	sergiobogan@yahoo.com.ar	Cenizo, Marcos/M-5144-2019	Cenizo, Marcos/0000-0001-9301-0205				107	3	3	0	2	PUBLIC LIBRARY SCIENCE	SAN FRANCISCO	1160 BATTERY STREET, STE 100, SAN FRANCISCO, CA 94111 USA	1932-6203			PLOS ONE	PLoS One	2008-07-01	2020	15	7			e0235196	10.1371/journal.pone.0235196	http://dx.doi.org/10.1371/journal.pone.0235196			27
J	Boulanger, MT; Lyman, RL	Boulanger, Matthew T.; Lyman, R. Lee							Northeastern North American Pleistocene megafauna chronologically overlapped minimally with Paleoindians	Quaternary Science Reviews	English	Article	extinction; megafauna; North America; paleoindian; radiocarbon	temporal frequence distributions; data quantitative strategies; colonization front speeds; New York State; radiocarbon dates; archaeological evidence; Washington State; climate change; time scale; extinction	It has long been argued that specialized big-game-hunting Paleoindians were responsible for the extinction of three dozen large-bodied mammalian genera in North America. In northeastern North America, the overkill hypothesis cannot be tested on the basis of associations of Paleoindian artifacts and remains of extinct mammals because no unequivocal associations are known. The overkill hypothesis r…	[Boulanger, Matthew T.; Lyman, R. Lee] Univ Missouri, Dept Anthropol, Columbia, MO 65211 USA; [Boulanger, Matthew T.] Univ Missouri Res Reactor, Archaeometry Lab, Columbia, MO 65211 USA	University of Missouri System; University of Missouri Columbia; University of Missouri System; University of Missouri Columbia	Boulanger, MT (corresponding author), Univ Missouri, Dept Anthropol, 107 Swallow Hall, Columbia, MO 65211 USA.	boulangerm@missouri.edu	Boulanger, Matthew/AAV-6818-2020	Boulanger, Matthew T./0000-0003-3384-7884				163	50	58	0	134	PERGAMON-ELSEVIER SCIENCE LTD	OXFORD	THE BOULEVARD, LANGFORD LANE, KIDLINGTON, OXFORD OX5 1GB, ENGLAND	0277-3791			QUATERNARY SCI REV	Quat. Sci. Rev.	2001-02-01	2014	85		35	46		10.1016/j.quascirev.2013.11.024	http://dx.doi.org/10.1016/j.quascirev.2013.11.024			12
J	Bover, P; Valenzuela, A; Torres, E; Cooper, A; Pons, J; Alcover, JA	Bover, Pere; Valenzuela, Alejandro; Torres, Enric; Cooper, Alan; Pons, Joan; Alcover, Josep A.							Closing the gap: New data on the last documented Myotragus and the first human evidence on Mallorca (Balearic Islands, Western Mediterranean Sea)	Holocene	English	Article	extinction; first human; Holocene; last megafauna; Mediterranean islands; radiocarbon dates	radiocarbon; bate; colonization; preservation; collagen; Artiodactyla; coprolites; Caprinae; samples; Buxus	The chronology of the extinction of the Balearic fossil bovid Myotragus balearicus in Mallorca and Menorca has been under discussion since its discovery in 1909, and especially in the last decades, thanks to the radiocarbon dates that have been obtained from several deposits of the island of Mallorca. Here, we present new radiocarbon dates of M. balearicus bones (including the most recent date ev…	[Bover, Pere; Valenzuela, Alejandro; Torres, Enric; Pons, Joan; Alcover, Josep A.] Inst Mediterrani Estudis Avancats, Dept Biodiversitat & Conservacio, Esporles, Illes Balears, Spain; [Bover, Pere; Cooper, Alan] Univ Adelaide, ACAD, Sch Biol Sci, Adelaide, SA 5005, Australia	Consejo Superior de Investigaciones Cientificas (CSIC); ATTITUS Educacao; University of Adelaide	Bover, P (corresponding author), UIB, Dept Biodiversitat & Conservacio, Inst Mediterrani Estudis Avancats, CSIC, Cr Miquel Marques 21, Esporles 07190, Illes Balears, Spain.	perebover@imedea.uib-csic.es	Torres-Roig, Enric/JXY-3656-2024; Cooper, Alan/E-8171-2012; Pons, Joan/A-5124-2008; Alcover, Josep Antoni/Y-3796-2018; Valenzuela, Alejandro/K-5925-2017	Pons, Joan/0000-0002-4683-8840; Cooper, Alan/0000-0002-7738-7851; Bover Arbos, Pedro/0000-0003-2942-2840; Torres-Roig, Enric/0000-0003-0221-2448; Alcover, Josep Antoni/0000-0001-9905-2588; Valenzuela, Alejandro/0000-0001-6120-6246	Direccion General de Investigacion Cientifica y Tecnica of the Spanish Ministerio de Economia y Competitividad [CGL2012-38087]; European Community [PIOF-GA-2011-300854]	Direccion General de Investigacion Cientifica y Tecnica of the Spanish Ministerio de Economia y Competitividad; European Community	This paper is included in the Research Project CGL2012-38087 (Direccion General de Investigacion Cientifica y Tecnica of the Spanish Ministerio de Economia y Competitividad). This research was supported by a Marie Curie International Outgoing Fellowship (P. Bover) within the 7th European Community Framework Programme (project MEDITADNA, PIOF-GA-2011-300854, FP7-PEOPLE).	59	25	25	0	10	SAGE PUBLICATIONS LTD	LONDON	1 OLIVERS YARD, 55 CITY ROAD, LONDON EC1Y 1SP, ENGLAND	0959-6836	1477-0911		HOLOCENE	Holocene	NOV	2016	26	11	1887	1891		10.1177/0959683616645945	http://dx.doi.org/10.1177/0959683616645945			5
J	Bowman, DMJS	Bowman, DMJS							Tansley Review No. 101 - The impact of Aboriginal landscape burning on the Australian biota	New Phytologist	English	Review	Australia; ethnoecology; fire ecology; history of vegetation; landscape ecology; palaeoecology	monsoon rainforest; New South Wales; Callitris-Intratropica Baker, R.T.; Tasmanian buttongrass moorlands; north-western Australia; Holocene pollen diagram; Late Pleistocene; fire regimes; eucalypt forest; vegetation history	One of the most complex and contentious issues in Australian ecology concerns the environmental impact of Aboriginal landscape burning. This issue is not only important for the development of a comprehensive understanding of the dynamics and evolution of the Australian biota, but is central to the formulation of appropriate strategies for the conservation of the nation's biodiversity. Ethnographi…	No Terr Univ, Ctr Indigenous Nat & Cultural Resource Management, Darwin, NT 0909, Australia; No Terr Univ, Fac Sci, Darwin, NT 0909, Australia	Charles Darwin University; Charles Darwin University	No Terr Univ, Ctr Indigenous Nat & Cultural Resource Management, Darwin, NT 0909, Australia.	david.bowman@ntu.edu.au	Bowman, David/A-2930-2011	Bowman, David/0000-0001-8075-124X				280	325	358	4	222	WILEY	HOBOKEN	111 RIVER ST, HOBOKEN 07030-5774, NJ USA	0028-646X	1469-8137		NEW PHYTOL	New Phytol.	NOV	1998	140	3	385	410		10.1046/j.1469-8137.1998.00289.x	http://dx.doi.org/10.1046/j.1469-8137.1998.00289.x			26
J	Bowman, DMJS; Murphy, BP; McMahon, CR	Bowman, David M. J. S.; Murphy, Brett P.; McMahon, Clive R.							Using carbon isotope analysis of the diet of two introduced Australian megaherbivores to understand Pleistocene megafaunal extinctions	Journal of Biogeography	English	Article	Aboriginal landscape burning; Asian water buffalo; banteng; feeding ecology; feral animals; foraging plasticity; invasion biology; Late Pleistocene extinctions; megafauna; stable isotope analysis	rock dwelling macropods; banteng Bos javanicus; central Arnhem Land; herbivorous mammals; Cobourg peninsula; monsoon; impact; Cyperaceae; vegetation; continent	Aim Australia lost a diverse assemblage of large marsupial herbivores in the late Pleistocene, with suggestions that the extinctions were biased towards browsers. In modern times two bovines, the Asian water buffalo (Bubalus bubalis) and banteng (Bos javanicus), have established feral populations in the Northern Territory, Australia. Buffalo have aggressively expanded throughout the savanna lands…	[Bowman, David M. J. S.; Murphy, Brett P.] Univ Tasmania, Sch Plant Sci, Hobart, Tas 7001, Australia; [McMahon, Clive R.] Charles Darwin Univ, Sch Environm Res, Inst Adv Studies, Darwin, NT 0909, Australia	University of Tasmania; Charles Darwin University	Bowman, DMJS (corresponding author), Univ Tasmania, Sch Plant Sci, Hobart, Tas 7001, Australia.	david.bowman@utas.edu.au	Murphy, Brett/A-3991-2011; Bowman, David/A-2930-2011; McMahon, Clive/D-5713-2013	Bowman, David/0000-0001-8075-124X; McMahon, Clive/0000-0001-5241-8917	Australian Research Council [LP0346929, LP0669303]; Garig Gunak Barlu National Park; Bawinanga Aboriginal Corporation; Northern Territory Parks and Wildlife Service; Australian Research Council [LP0346929, LP0669303] Funding Source: Australian Research Council	Australian Research Council(Australian Research Council); Garig Gunak Barlu National Park; Bawinanga Aboriginal Corporation; Northern Territory Parks and Wildlife Service; Australian Research Council(Australian Research Council)	We thank Carmen Crossing for preparing the dung samples for analysis. The work was supported by Australian Research Council linkage grants LP0346929 and LP0669303 with support from Garig Gunak Barlu National Park, Bawinanga Aboriginal Corporation and the Northern Territory Parks and Wildlife Service.	40	23	26	0	54	WILEY	HOBOKEN	111 RIVER ST, HOBOKEN 07030-5774, NJ USA	0305-0270	1365-2699		J BIOGEOGR	J. Biogeogr.	MAR	2010	37	3	499	505		10.1111/j.1365-2699.2009.02206.x	http://dx.doi.org/10.1111/j.1365-2699.2009.02206.x			7
J	Brault, MO; Mysak, LA; Matthews, HD; Simmons, CT	Brault, M-O.; Mysak, L. A.; Matthews, H. D.; Simmons, C. T.							Assessing the impact of late Pleistocene megafaunal extinctions on global vegetation and climate	Climate of the Past	English	Article		land cover change; Late Quaternary; boreal forest; system; model; dynamics; sensitivity; ecosystems; simulation; feedbacks	The end of the Pleistocene was a turning point for the Earth system as climate gradually emerged from millennia of severe glaciation in the Northern Hemisphere. The deglacial climate change coincided with an unprecedented decline in many species of Pleistocene megafauna, including the near-total eradication of the woolly mammoth. Due to an herbivorous diet that presumably involved large-scale tre…	[Brault, M-O.; Mysak, L. A.; Simmons, C. T.] McGill Univ, Dept Atmospher & Ocean Sci, Montreal, PQ, Canada; [Matthews, H. D.] Concordia Univ, Dept Geog Planning & Environm, Montreal, PQ, Canada	McGill University; Concordia University - Canada	Brault, MO (corresponding author), McGill Univ, Dept Geog, Montreal, PQ, Canada.	marc-olivier.brault@mail.mcgill.ca	Matthews, H/AAD-2430-2020		Natural Sciences and Engineering Research Council (NSERC); Global Environmental and Climate Change Centre (GEC3)	Natural Sciences and Engineering Research Council (NSERC)(Natural Sciences and Engineering Research Council of Canada (NSERC)); Global Environmental and Climate Change Centre (GEC3)	This paper is based on a thesis prepared by Marc-Olivier Brault during spring 2012 for the fulfillment of his MSc degree at McGill University. We are indebted to Jaime Palter for her helpful comments on the thesis manuscript, and to Michael Havas for technical assistance. Special thanks to Eric Galbraith for helpful tips in finding the cause of the cold anomaly in the Weddell Sea. The support of …	52	10	12	5	79	COPERNICUS GESELLSCHAFT MBH	GOTTINGEN	BAHNHOFSALLEE 1E, GOTTINGEN, 37081, GERMANY	1814-9324	1814-9332		CLIM PAST	Clim. Past.		2013	9	4	1761	1771		10.5194/cp-9-1761-2013	http://dx.doi.org/10.5194/cp-9-1761-2013			11
J	Brook, B.W., Johnson, C.N.								Selective hunting of juveniles as a cause of the imperceptible overkill of the australian pleistocene megafauna	Alcheringa	English	Article	extinction; age-structure; over-hunting; blitzkrieg; Diprotodon optatum		Overkill by human hunting has been cited consistently as a likely cause of the Pleistocene megafaunal extinctions in Australia, but little archaeological evidence has been found to support the notion of prehistoric Aboriginal people engaging in specialised “big game” hunting more than 40 millennia ago. Here we develop a demographic population model that considers explicitly the potential impact o…										44														2006	30		39	48		10.1080/03115510609506854				9
J	Brook, BW; Bowman, DMJS	Brook, BW; Bowman, DMJS							Explaining the Pleistocene megafaunal extinctions: Models, chronologies, and assumptions	Proceedings of the National Academy of Sciences of the United States of America	English	Editorial Material		buffalo Bubalus Bubalis; oldest human remains; water buffalo; Northern Territory; human colonization; top end; Australia; paleontology; prey	Understanding of the Pleistocene megafaunal extinctions has been advanced recently by the application of simulation models and new developments in geochronological dating. Together these have been used to posit a rapid demise of megafauna due to over-hunting by invading humans. However, we demonstrate that the results of these extinction models are highly sensitive to implicit assumptions concern…	No Terr Univ, Key Ctr Trop Wildlife Management, Darwin, NT 0909, Australia	Charles Darwin University	No Terr Univ, Key Ctr Trop Wildlife Management, Darwin, NT 0909, Australia.	barry.brook@ntu.edu.au	Brook, Barry/G-2686-2011; Bowman, David/A-2930-2011	Brook, Barry/0000-0002-2491-1517; Bowman, David/0000-0001-8075-124X				47	80	93	0	61	NATL ACAD SCIENCES	WASHINGTON	2101 CONSTITUTION AVE NW, WASHINGTON, DC 20418 USA	0027-8424			P NATL ACAD SCI USA	Proc. Natl. Acad. Sci. U. S. A.	2012-11-01	2002	99	23	14624	14627		10.1073/pnas.232126899	http://dx.doi.org/10.1073/pnas.232126899			4
J	Broughton, JM; Weitzel, EM	Broughton, Jack M.; Weitzel, Elic M.							Population reconstructions for humans and megafauna suggest mixed causes for North American Pleistocene extinctions	Nature Communications	English	Article		radiocarbon dates; climate; overkill; impact; state; distributions; colonization; simulation; demography	Dozens of large mammals such as mammoth and mastodon disappeared in North America at the end of the Pleistocene with climate change and overkill by human hunters the most widely-argued causes. However, the population dynamics of humans and megafauna preceding extinctions have received little attention even though such information may be telling as we expect increasing human populations to be corr…	[Broughton, Jack M.] Univ Utah, Dept Anthropol, 260 Cent Campus Dr,Suite 4444, Salt Lake City, UT 84112 USA; [Broughton, Jack M.] Univ Utah, Archaeol Ctr, 260 Cent Campus Dr,Suite 4444, Salt Lake City, UT 84112 USA; [Weitzel, Elic M.] Univ Connecticut, Dept Anthropol, 354 Mansfield Rd, Storrs, CT 06269 USA	Utah System of Higher Education; University of Utah; Utah System of Higher Education; University of Utah; University of Connecticut	Broughton, JM (corresponding author), Univ Utah, Dept Anthropol, 260 Cent Campus Dr,Suite 4444, Salt Lake City, UT 84112 USA.;Broughton, JM (corresponding author), Univ Utah, Archaeol Ctr, 260 Cent Campus Dr,Suite 4444, Salt Lake City, UT 84112 USA.	jack.broughton@anthro.utah.edu	Weitzel, Elic/AAI-1341-2020					71	61	74	18	144	NATURE PUBLISHING GROUP	LONDON	MACMILLAN BUILDING, 4 CRINAN ST, LONDON N1 9XW, ENGLAND	2041-1723			NAT COMMUN	Nat. Commun.	2021-12-01	2018	9				5441	10.1038/s41467-018-07897-1	http://dx.doi.org/10.1038/s41467-018-07897-1			12
J	Brownstein, CD	Brownstein, Chase D.							Caesar's Bestiary: using classical accounts to statistically map changes in the large mammal fauna of Germany during the Pleistocene and Holocene	Historical Biology	English	Article	Europe; Hercynian forest; megafauna; Pleistocene; Holocene; Rome	site	In De Bello Gallico, Gaius Julius Caesar describes the various campaigns waged by the Romans under his leadership against the 'Gauls' and the geography, wildlife, and the various tribes of the lands he observed during his time in 'Gallia'. Caesar remarks in one passage in chapters 26-28 of book 6 on the large mammals of an area of wilderness known to him as 'Hercynia Silva,' the Hercynian Forest.…	[Brownstein, Chase D.] Stamford Museum, Collect & Exhibit, Stamford, CT 06903 USA		Brownstein, CD (corresponding author), Stamford Museum, Collect & Exhibit, Stamford, CT 06903 USA.	chasethedinosaur@gmail.com						48	0	0	0	5	TAYLOR & FRANCIS LTD	ABINGDON	2-4 PARK SQUARE, MILTON PARK, ABINGDON OR14 4RN, OXON, ENGLAND	0891-2963	1029-2381		HIST BIOL	Hist. Biol.		2020	32	5	635	644		10.1080/08912963.2018.1520230	http://dx.doi.org/10.1080/08912963.2018.1520230			10
J	Burney, D.A.	Burney, D.A.							Late Holocene Environmental changes in arid southwestern Madagascar	Quaternary Research	English	Article		southern Madagascar; charcoal; extinction; sediments; indicator	A 5000-yr stratigraphic record containing fossil pollen, charcoal, and bones of the extinct Quaternary megafauna from Andolonomby, a hypersaline pond in arid southwestern Madagascar, shows evidence for climatic desiccation beginning about 3000 yr B.P. Pollen spectra shift at this time from primarily arboreal taxa characteristic of forests and woodlands of more mesic western Madagascar, to wooded …			BURNEY, DA (corresponding author), FORDHAM UNIV,DEPT BIOL SCI,BRONX,NY 10458, USA.							29	119	129	0	14	ACADEMIC PRESS INC JNL-COMP SUBSCRIPTIONS	SAN DIEGO	525 B ST, STE 1900, SAN DIEGO, CA 92101-4495	0033-5894			QUATERNARY RES	Quat. Res.	JUL	1993	40	1	98	106		10.1006/qres.1993.1060	http://dx.doi.org/10.1006/qres.1993.1060			9
J	Burney, DA; Burney, LP; Godfrey, LR; Jungers, WL; Goodman, SM; Wright, HT; Jull, AJT	Burney, DA; Burney, LP; Godfrey, LR; Jungers, WL; Goodman, SM; Wright, HT; Jull, AJT							A chronology for late prehistoric Madagascar	Journal of Human Evolution	English	Article	Madagascar; lemur; extinction; dating; paleoecology; megafauna; C-14 human settlement	environmental changes; southern Madagascar; Ankarana Massif; extinction; record; Sporormiella; sediments; history; forests; tropics	A database has been assembled with 278 age determinations for Madagascar. Materials C-14 dated include pretreated sediments and plant macrofossils from cores and excavations throughout the island, and bones, teeth, or eggshells of most of the extinct megafaunal taxa, including the giant lemurs, hippopotami, and ratites. Additional measurements come from uranium-series dates on speleothems and the…	Fordham Univ, Dept Biol Sci, Bronx, NY 10458 USA; Fordham Univ, Louis Calder Ctr Biol Field Stn, Armonk, NY 10504 USA; Univ Massachusetts, Dept Anthropol, Amherst, MA 01003 USA; SUNY Stony Brook, Dept Anat Sci, Stony Brook, NY 11794 USA; Field Museum Nat Hist, Chicago, IL 60605 USA; Univ Michigan, Museum Anthropol, Ann Arbor, MI 48109 USA; Univ Arizona, NSF Arizona AMS Facile, Tucson, AZ 85721 USA	Fordham University; Fordham University; University of Massachusetts System; University of Massachusetts Amherst; State University of New York (SUNY) System; Stony Brook University; Field Museum of Natural History (Chicago); University of Michigan System; University of Michigan; University of Arizona	Fordham Univ, Dept Biol Sci, Bronx, NY 10458 USA.	burney@fordham.edu; lburney@fordham.edu; lgodfrey@anthro.umass.edu; william.jungers@sunysb.edu; sgoodman@fieldmuseum.org; hwright@umich.edu; ajtjull@physics.arizona.edu						96	332	383	0	123	ACADEMIC PRESS LTD- ELSEVIER SCIENCE LTD	LONDON	24-28 OVAL RD, LONDON NW1 7DX, ENGLAND	0047-2484			J HUM EVOL	J. Hum. Evol.	JUL-AUG	2004	47	2025-02-01	25	63		10.1016/j.jhevol.2004.05.005	http://dx.doi.org/10.1016/j.jhevol.2004.05.005			39
J	Campos, PF; Willerslev, E; Sher, A; Orlando, L; Axelsson, E; Tikhonov, A; Aaris-Sorensen, K; Greenwood, AD; Kahlke, RD; Kosintsev, P; Krakhmalnaya, T; Kuznetsova, T; Lemey, P; MacPhee, R; Norris, CA; Shepherd, K; Suchard, MA; Zazula, GD; Shapiro, B; Gilbert, MTP	Campos, Paula F.; Willerslev, Eske; Sher, Andrei; Orlando, Ludovic; Axelsson, Erik; Tikhonov, Alexei; Aaris-Sorensen, Kim; Greenwood, Alex D.; Kahlke, Ralf-Dietrich; Kosintsev, Pavel; Krakhmalnaya, Tatiana; Kuznetsova, Tatyana; Lemey, Philippe; MacPhee, Ross; Norris, Christopher A.; Shepherd, Kieran; Suchard, Marc A.; Zazula, Grant D.; Shapiro, Beth; Gilbert, M. Thomas P.							Ancient DNA analyses exclude humans as the driving force behind late Pleistocene musk ox (Ovibos moschatus) population dynamics	Proceedings of the National Academy of Sciences of the United States of America	English	Article	climate change; human impact; Quaternary; megafauna extinctions	Last Glacial Maximum; northern Eurasia; ice sheet; woolly mammoths; New World; Greenland; climate; extinctions; inference; America	The causes of the late Pleistocene megafaunal extinctions are poorly understood. Different lines of evidence point to climate change, the arrival of humans, or a combination of these events as the trigger. Although many species went extinct, others, such as caribou and bison, survived to the present. The musk ox has an intermediate story: relatively abundant during the Pleistocene, it is now rest…	[Campos, Paula F.; Willerslev, Eske; Axelsson, Erik; Aaris-Sorensen, Kim; Gilbert, M. Thomas P.] Univ Copenhagen, Ctr GeoGenet, Nat Hist Museum Denmark, DK-1350 Copenhagen, Denmark; [Sher, Andrei] Russian Acad Sci, Severtsov Inst Ecol & Evolut, Moscow 119071, Russia; [Orlando, Ludovic] Univ Lyon 1, CNRS, Inst Genom Fonct Lyon, Inst Natl Rech Agron,Ecole Normale Super Lyon, F-69364 Lyon 07, France…	University of Copenhagen; Russian Academy of Sciences; Saratov Scientific Center of the Russian Academy of Sciences; Severtsov Institute of Ecology & Evolution; CHU Lyon; Centre National de la Recherche Scientifique (CNRS); Ecole Normale Superieure de Lyon (ENS de LYON); Universite Claude Bernard Lyon 1; INRAE; Russian Academy of Sciences; Zoological Institute of the Russian Academy of Sciences; …	Gilbert, MTP (corresponding author), Univ Copenhagen, Ctr GeoGenet, Nat Hist Museum Denmark, DK-1350 Copenhagen, Denmark.	mtpgilbert@gmail.com	Campos, Paula/ABF-9898-2021; Tikhonov, Alexei/G-7478-2016; Axelsson, Erik/A-6119-2009; Lemey, Philippe/C-3755-2018; Kuznetsova, Tatiana/B-2755-2016; Willerslev, Eske/A-9619-2011; Greenwood, Alex/GWU-8292-2022; Gilbert, Marcus/A-8936-2013; Kuznetsova, Tatyana/J-4806-2013; Campos, Paula/B-1634-2010; Orlando, Ludovic/A-8932-2013	Tikhonov, Alexei/0000-0002-7227-5797; Willerslev, Eske/0000-0002-7081-6748; Gilbert, Marcus/0000-0002-5805-7195; Shapiro, Beth/0000-0002-2733-7776; Kuznetsova, Tatyana/0000-0003-4302-9607; Campos, Paula/0000-0003-1285-4671; Orlando, Ludovic/0000-0003-3936-1850	Forsknings-og Innovationsstyrelsen [272-07-0279]; Marie Curie Actions	Forsknings-og Innovationsstyrelsen; Marie Curie Actions(European Union (EU)Marie Curie Actions)	The authors thank Jennifer Leonard for useful discussion and A. Cooper, P. Matheus, J. Meng, and D. Mol for access to their collections and obtaining samples. This study was funded in part by Forsknings-og Innovationsstyrelsen 272-07-0279 Skou Grant (to M. T. P. G.) and the Marie Curie Actions GeneTime Grant (to P. F. C. and E. W.).	64	161	183	5	148	NATL ACAD SCIENCES	WASHINGTON	2101 CONSTITUTION AVE NW, WASHINGTON, DC 20418 USA	0027-8424			P NATL ACAD SCI USA	Proc. Natl. Acad. Sci. U. S. A.	2023-03-01	2010	107	12	5675	5680		10.1073/pnas.0907189107	http://dx.doi.org/10.1073/pnas.0907189107			6
J	Cannon, MD; Meltzer, DJ	Cannon, MD; Meltzer, DJ							Early Paleoindian foraging: examining the faunal evidence for large mammal specialization and regional variability in prey choice	Quaternary Science Reviews	English	Review		relative abundance; taphonomic analysis; mastodon butchery; mammoth remains; age profiles; site; Clovis; archaeology; Holocene; extinction	North American archaeologists have spent much effort debating whether Early Paleoindian foragers were specialized hunters of megafauna or whether they pursued more generalized subsistence strategies. In doing so, many have treated the foraging practices of early North Americans as if they must have been uniform across the continent, even though others have pointed out that adaptations appear to h…	So Methodist Univ, Dept Anthropol, Dallas, TX 75275 USA	Southern Methodist University	Calif State Univ Long Beach, Dept Anthropol, 1250 Bellflower Blvd, Long Beach, CA 90840 USA.	mcannon@csulb.edu		Meltzer, David/0000-0001-8084-9802				204	112	160	0	17	PERGAMON-ELSEVIER SCIENCE LTD	OXFORD	THE BOULEVARD, LANGFORD LANE, KIDLINGTON, OXFORD OX5 1GB, ENGLAND	0277-3791			QUATERNARY SCI REV	Quat. Sci. Rev.	OCT	2004	23	18-19	1955	1987		10.1016/j.quascirev.2004.03.011	http://dx.doi.org/10.1016/j.quascirev.2004.03.011			33
J	Cantalapiedra, JL; Sanisidro, O; Zhang, HW; Alberdi, MT; Prado, JL; Blanco, F; Saarinen, J	Cantalapiedra, Juan L.; Sanisidro, Oscar; Zhang, Hanwen; Alberdi, Maria T.; Prado, Jose L.; Blanco, Fernando; Saarinen, Juha							The rise and fall of proboscidean ecological diversity	Nature Ecology & Evolution	English	Article		Pleistocene Proboscideans; niche separation; R package; evolution; diversification; extinctions; origins; ammals; fossils; driven	Proboscideans were keystone Cenozoic megaherbivores and present a highly relevant case study to frame the timing and magnitude of recent megafauna extinctions against long-term macroevolutionary patterns. By surveying the entire proboscidean fossil history using model-based approaches, we show that the dramatic Miocene explosion of proboscidean functional diversity was triggered by their biogeogr…	[Cantalapiedra, Juan L.; Sanisidro, Oscar] Univ Alcala, Dept Ciencias Vida, GIoCEE Global Change Ecol & Evolut Res Grp, Madrid, Spain; [Zhang, Hanwen] Univ Bristol, Sch Earth Sci, Wills Mem Bldg, Bristol, Avon, England; [Zhang, Hanwen] Nat Hist Museum, Dept Earth Sci, London, England; [Alberdi, Maria T.] Museo Nacl Ciencias Nat, Dept Paleobiol, Madrid, Spain; [Prado, Jose L.] Univ Nacl Ctr Prov B…	Universidad de Alcala; University of Bristol; Natural History Museum London; Consejo Superior de Investigaciones Cientificas (CSIC); CSIC - Museo Nacional de Ciencias Naturales (MNCN); Comision Nacional de Energia Atomica (CNEA); Consejo Nacional de Investigaciones Cientificas y Tecnicas (CONICET); Leibniz Institut fur Evolutions und Biodiversitatsforschung; University of Helsinki	Cantalapiedra, JL (corresponding author), Univ Alcala, Dept Ciencias Vida, GIoCEE Global Change Ecol & Evolut Res Grp, Madrid, Spain.	jlopezcant@gmail.com	Alberdi, Maria/ABG-8623-2020; Sanisidro, Oscar/AAG-8627-2020; Zhang, Hanwen/AAU-6473-2021; Blanco, Fernando/F-5823-2018; L. Cantalapiedra, Juan/L-2135-2014	Blanco, Fernando/0000-0001-6339-3460; Sanisidro, Oscar/0000-0002-8238-6394; Zhang, Hanwen/0000-0002-2674-3035; L. Cantalapiedra, Juan/0000-0003-0913-7735	Talent Attraction Program of the Madrid Government [2017-T1/AMB5298]; German Research Foundation [637491]; Academy of Finland [315691]; Academy of Finland (AKA) [315691] Funding Source: Academy of Finland (AKA)	Talent Attraction Program of the Madrid Government; German Research Foundation(German Research Foundation (DFG)); Academy of Finland(Research Council of Finland); Academy of Finland (AKA)(Research Council of Finland)	We thank D. Silvestro, J. Calatayud and J. Clavel for technical assistance and F. Bibi, M. J. Benton and W. J. Sanders for helpful comments. S. Wang and G. van den Bergh provided important constructive comments on the informal supertree. We also thank E. M. Dunne, D. Mothe and F. Rivals, whose comments and recommendations improved the presentation of this paper. This work was supported by the Tal…	54	28	30	1	31	NATURE PORTFOLIO	BERLIN	HEIDELBERGER PLATZ 3, BERLIN, 14197, GERMANY	2397-334X			NAT ECOL EVOL	Nat. Ecol. Evol.	SEP	2021	5	9	1266	+		10.1038/s41559-021-01498-w	http://dx.doi.org/10.1038/s41559-021-01498-w		2021-07-01	19
J	Canteri, E; Brown, SC; Schmidt, NM; Heller, R; Nogués-Bravo, D; Fordham, DA	Canteri, Elisabetta; Brown, Stuart C.; Schmidt, Niels Martin; Heller, Rasmus; Nogues-Bravo, David; Fordham, Damien A.							Spatiotemporal influences of climate and humans on muskox range dynamics over multiple millennia	Global Change Biology	English	Article	Arctic; climate change; exploitation; extinction dynamics; mechanistic model; megafauna; range dynamics; spatially explicit population model	ox Ovibos moschatus; ancient DNA, snow cover; extinction; ice; Holocene; models; simulation; predation; megafauna	Processes leading to range contractions and population declines of Arctic megafauna during the late Pleistocene and early Holocene are uncertain, with intense debate on the roles of human hunting, climatic change, and their synergy. Obstacles to a resolution have included an overreliance on correlative rather than process-explicit approaches for inferring drivers of distributional and demographic…	[Canteri, Elisabetta; Brown, Stuart C.; Fordham, Damien A.] Univ Adelaide, Environm Inst, Adelaide, SA 5005, Australia; [Canteri, Elisabetta; Brown, Stuart C.; Fordham, Damien A.] Univ Adelaide, Sch Biol Sci, Adelaide, SA 5005, Australia; [Canteri, Elisabetta; Nogues-Bravo, David; Fordham, Damien A.] Univ Copenhagen, Ctr Macroecol Evolut & Climate, Globe Inst, Copenhagen, Denmark; [Brown, Stuart …	University of Adelaide; University of Adelaide; University of Copenhagen; University of Copenhagen; Aarhus University; Aarhus University; University of Copenhagen; University of Copenhagen	Canteri, E; Fordham, DA (corresponding author), Univ Adelaide, Environm Inst, Adelaide, SA 5005, Australia.;Canteri, E; Fordham, DA (corresponding author), Univ Adelaide, Sch Biol Sci, Adelaide, SA 5005, Australia.	elisabetta.canteri@adelaide.edu.au; damien.fordham@adelaide.edu.au	Heller, Rasmus/M-2580-2014; Brown, Stuart/AAC-7472-2020; Fordham, Damien/E-9255-2013; Schmidt, Niels Martin/G-3843-2011	Nogues-Bravo, David/0000-0002-4060-0153; Fordham, Damien/0000-0003-2137-5592; Canteri, Elisabetta/0000-0001-9867-8247; Brown, Stuart/0000-0002-0669-1418; Schmidt, Niels Martin/0000-0002-4166-6218	Australian Research Council [DP180102392, FT140101192]; Danmarks Grundforskningsfond [DNRF96]; Australian Research Council [FT140101192] Funding Source: Australian Research Council	Australian Research Council(Australian Research Council); Danmarks Grundforskningsfond(Danmarks Grundforskningsfond); Australian Research Council(Australian Research Council)	Australian Research Council, Grant/Award Number: DP180102392 and FT140101192; Danmarks Grundforskningsfond, Grant/Award Number: DNRF96	100	12	12	2	25	WILEY	HOBOKEN	111 RIVER ST, HOBOKEN 07030-5774, NJ USA	1354-1013	1365-2486		GLOBAL CHANGE BIOL	Glob. Change Biol.	NOV	2022	28	22	6602	6617		10.1111/gcb.16375	http://dx.doi.org/10.1111/gcb.16375		2022-08-01	16
J	Carlini, AA; Carrillo-Briceño, JD; Jaimes, A; Aguilera, O; Zurita, AE; Iriarte, J; Sánchez-Villagra, MR	Carlini, Alfredo A.; Carrillo-Briceno, Jorge D.; Jaimes, Arturo; Aguilera, Orangel; Zurita, Alfredo E.; Iriarte, Jose; Sanchez-Villagra, Marcelo R.							Damaged glyptodontid skulls from Late Pleistocene sites of northwestern Venezuela: evidence of hunting by humans?	Swiss Journal of Palaeontology	English	Article	hunting; Glyptodonts; megafauna; extinction; South America	Early Holocene; Pampean region; South-America; Xenarthra; Cingulata; Mammalia; fossil; extinction; record	The Muaco and Taima-Taima sites, in Falcon State of northwestern Venezuela, are among the earliest sites of human occupation in South America containing artifacts associated with preserved megafaunal remains and dating between 19,810 and 15,780 calybp. Here we report novel visual and CT scanning analysis of six glyptodont skulls of Glyptotherium cf. cylindricum from these sites, of which four exh…	[Carlini, Alfredo A.] UNLP, Lab Morfol Evolut & Desarrollo Morphos, Fac Cs & Nat & Museo, CONICET Consejo Nacl Invest Cient & Tecn, Buenos Aires, DF, Argentina; [Carrillo-Briceno, Jorge D.; Sanchez-Villagra, Marcelo R.] Univ Zurich, Palaeontol Inst & Museum, Karl Schmid Str 4, CH-8006 Zurich, Switzerland; [Jaimes, Arturo] Inst Venezolano Invest Cient, Ctr Antropol, Km 11 Altos Pipe, Parroquia Mac…	National University of La Plata; Consejo Nacional de Investigaciones Cientificas y Tecnicas (CONICET); University of Zurich; Venezuelan Institute Science Research; Universidade Federal Fluminense; University of Exeter	Sánchez-Villagra, MR (corresponding author), Univ Zurich, Palaeontol Inst & Museum, Karl Schmid Str 4, CH-8006 Zurich, Switzerland.	m.sanchez@pim.uzh.ch	Aguilera, Orangel/D-5055-2013; Iriarte, Jose/A-1141-2010	Aguilera, Orangel/0000-0003-4418-8351; Zurita, Alfredo/0009-0002-2130-9798; Iriarte, Jose/0000-0002-8155-5360; Sanchez-Villagra, Marcelo Ricardo/0000-0001-7587-3648; Carrillo Briceno, Jorge Domingo/0000-0002-8652-7692	University of Zurich - ERC project LASTJOURNEY [ERC_Adv_834514]	University of Zurich - ERC project LASTJOURNEY	This work was supported by the University of Zurich (Einrichtungskredit to MRSV). Jose Iriarte time was funded by the ERC project LASTJOURNEY (ERC_Adv_834514).	77	9	11	0	4	SPRINGER INT PUBL AG	CHAM	GEWERBESTRASSE 11, CHAM, CH-6330, SWITZERLAND	1664-2376	1664-2384		SWISS J PALAEONTOL	Swiss J. Palaeontol.	DEC	2022	141	1			11	10.1186/s13358-022-00253-3	http://dx.doi.org/10.1186/s13358-022-00253-3			14
J	Carotenuto, F; Di Febbraro, M; Melchionna, M; Castiglione, S; Saggese, F; Serio, C; Mondanaro, A; Passaro, F; Loy, A; Raia, P	Carotenuto, F.; Di Febbraro, M.; Melchionna, M.; Castiglione, S.; Saggese, F.; Serio, C.; Mondanaro, A.; Passaro, F.; Loy, A.; Raia, P.							The influence of climate on species distribution over time and space during the late Quaternary	Quaternary Science Reviews	English	Article	Last Glacial Maximum; habitat filtering; phylogenetic community assembly; mammoth steppe; joint species distribution models	large mammal communities; body-size; extinction chronology; high resolution; turnover-pulse; mammoth steppe; Late Miocene; range size; Pleistocene; overkill	Understanding the effect of climate on the composition of communities and its change over time and space is one of the major aims in ecology and paleoecology. Herein, we tackled on this issue by studying late Quaternary large mammal paleocommunities of Eurasia. The late Quaternary was a period of strong environmental instability, especially characterized by the occurrence of the last glacial maxi…	[Carotenuto, F.; Melchionna, M.; Castiglione, S.; Saggese, F.; Serio, C.; Mondanaro, A.; Passaro, F.; Raia, P.] Univ Naples Federico II, Dept Earth Sci Environm & Resources DiSTAR, Lgo San Marcellino 10, I-80138 Naples, Italy; [Di Febbraro, M.; Loy, A.] Univ Molise, Dept Biosci & Terr DiBT, Environmetr Lab, I-86090 Pesche, Italy	University of Naples Federico II; University of Molise	Raia, P (corresponding author), Univ Naples Federico II, Dept Earth Sci Environm & Resources DiSTAR, Lgo San Marcellino 10, I-80138 Naples, Italy.	pasquale.raia@unina.it	Carotenuto, Francesco/HPD-2187-2023; Di Febbraro, Mirko/GQA-4462-2022; Mondanaro, Alessandro/F-6893-2017; Raia, Pasquale/I-8600-2012; Melchionna, Marina/F-6868-2017; Castiglione, Silvia/F-6840-2017; Serio, Carmela/F-6854-2017	Di Febbraro, Mirko/0000-0001-8898-7046; Mondanaro, Alessandro/0000-0003-0325-7066; Raia, Pasquale/0000-0002-4593-8006; Melchionna, Marina/0000-0001-7919-4431; LOY, Anna/0000-0002-8934-6694; Castiglione, Silvia/0000-0002-6140-1495; Serio, Carmela/0000-0001-5256-5511; Carotenuto, Francesco/0000-0001-8343-723X				89	21	21	0	81	PERGAMON-ELSEVIER SCIENCE LTD	OXFORD	THE BOULEVARD, LANGFORD LANE, KIDLINGTON, OXFORD OX5 1GB, ENGLAND	0277-3791	1873-457X		QUATERNARY SCI REV	Quat. Sci. Rev.	2001-10-01	2016	149		188	199		10.1016/j.quascirev.2016.07.036	http://dx.doi.org/10.1016/j.quascirev.2016.07.036			12
J	Carotenuto, F; Di Febbraro, M; Melchionna, M; Mondanaro, A; Castiglione, S; Serio, C; Rook, L; Loy, A; Lima-Ribeiro, MS; Diniz, JAF; Raia, P	Carotenuto, F.; Di Febbraro, M.; Melchionna, M.; Mondanaro, A.; Castiglione, S.; Serio, C.; Rook, L.; Loy, A.; Lima-Ribeiro, M. S.; Diniz-Filho, J. A. F.; Raia, P.							The well-behaved killer: Late Pleistocene humans in Eurasia were significantly associated with living megafauna only	Palaeogeography Palaeoclimatology Palaeoecology	English	Article	megafauna extinction; switch selection; Late Pleistocene hunter-gatherers; climate change	Late Quaternary megafauna; species distribution; life-history; extinctions; climate; nice; selection; strength; predicts; overkill	The end of the Pleistocene was characterized by an intense, highly selective extinction event, affecting large bodied terrestrial mammals worldwide. This period coincides with two major events, the last glacial period, and the dispersal of technologically advanced Homo sapiens outside the Old World. Upper Paleolithic hunters were armed with advanced, projectile weapons, and were able to dispatch …	[Carotenuto, F.; Melchionna, M.; Mondanaro, A.; Castiglione, S.; Serio, C.; Raia, P.] Univ Naples Federico II, Dept Earth Sci Environm & Resources, I-80138 Naples, Italy; [Di Febbraro, M.; Loy, A.] Univ Molise, Dept Biosci & Terr DiBT, Environmetr Lab, I-86090 Pesche, Italy; [Mondanaro, A.; Rook, L.] Univ Florence, Dept Earth Sci, I-50121 Florence, Italy; [Lima-Ribeiro, M. S.] Univ Fed Goias, Lab…	University of Naples Federico II; University of Molise; University of Florence; Universidade Federal de Goias; Universidade Federal de Goias	Raia, P (corresponding author), Univ Naples Federico II, Dept Earth Sci Environm & Resources, I-80138 Naples, Italy.	pasquale.raia@unina.it	Diniz-Filho, José/D-9405-2013; Rook, Lorenzo/AAA-5014-2019; Di Febbraro, Mirko/GQA-4462-2022; Carotenuto, Francesco/HPD-2187-2023; Melchionna, Marina/F-6868-2017; Castiglione, Silvia/F-6840-2017; Serio, Carmela/F-6854-2017; Lima-Ribeiro, Matheus/H-9503-2014; Mondanaro, Alessandro/F-6893-2017; Raia, Pasquale/I-8600-2012	Melchionna, Marina/0000-0001-7919-4431; Castiglione, Silvia/0000-0002-6140-1495; Carotenuto, Francesco/0000-0001-8343-723X; Serio, Carmela/0000-0001-5256-5511; Lima-Ribeiro, Matheus/0000-0002-3322-1702; Mondanaro, Alessandro/0000-0003-0325-7066; Rook, Lorenzo/0000-0001-8923-5428; Di Febbraro, Mirko/0000-0001-8898-7046; Raia, Pasquale/0000-0002-4593-8006				61	6	6	6	66	ELSEVIER	AMSTERDAM	RADARWEG 29, 1043 NX AMSTERDAM, NETHERLANDS	0031-0182	1872-616X		PALAEOGEOGR PALAEOCL	Paleogeogr. Paleoclimatol. Paleoecol.	2001-07-01	2018	500		24	32		10.1016/j.palaeo.2018.03.036	http://dx.doi.org/10.1016/j.palaeo.2018.03.036			9
J	Carrasco, MA; Barnosky, AD; Graham, RW	Carrasco, Marc A.; Barnosky, Anthony D.; Graham, Russell W.							Quantifying the Extent of North American Mammal Extinction Relative to the Pre-Anthropogenic Baseline	Plos ONE	English	Article		species-area relationships; diversity; future; distributions; rarefractions; Quaternary; megafauna; richness; ecology; trends	Earth has experienced five major extinction events in the past 450 million years. Many scientists suggest we are now witnessing a sixth, driven by human impacts. However, it has been difficult to quantify the real extent of the current extinction episode, either for a given taxonomic group at the continental scale or for the worldwide biota, largely because comparisons of pre-anthropogenic and an…	[Carrasco, Marc A.; Barnosky, Anthony D.] Univ Calif Berkeley, Dept Integrat Biol, Berkeley, CA 94720 USA; [Carrasco, Marc A.; Barnosky, Anthony D.] Univ Calif Berkeley, Museum Paleontol, Berkeley, CA 94720 USA; [Barnosky, Anthony D.] Univ Calif Berkeley, Museum Vertebrate Zool, Berkeley, CA 94720 USA; [Graham, Russell W.] Penn State Univ, Dept Geosci, University Pk, PA 16802 USA; [Graham, Russel…	University of California System; University of California Berkeley; University of California System; University of California Berkeley; University of California System; University of California Berkeley; Pennsylvania Commonwealth System of Higher Education (PCSHE); Pennsylvania State University; Pennsylvania State University - University Park; Pennsylvania Commonwealth System of Higher Education …	Carrasco, MA (corresponding author), Univ Calif Berkeley, Dept Integrat Biol, Berkeley, CA 94720 USA.	carrasco@berkeley.edu			National Science Foundation [EAR-0310221, DEB-0543641, EAR-9005144, EAR-9807499]	National Science Foundation(National Science Foundation (NSF))	Funding was provided by the National Science Foundation Grants EAR-0310221 and DEB-0543641 (Barnosky) and EAR-9005144 and EAR-9807499 (Graham). The funders had no role in study design, data collection and analysis, decision to publish, or preparation of the manuscript.	64	35	40	1	81	PUBLIC LIBRARY SCIENCE	SAN FRANCISCO	1160 BATTERY STREET, STE 100, SAN FRANCISCO, CA 94111 USA	1932-6203			PLOS ONE	PLoS One	2016-12-01	2009	4	12			e8331	10.1371/journal.pone.0008331	http://dx.doi.org/10.1371/journal.pone.0008331			7
J	Carter, BE; Alroy, J	Carter, Benjamin E.; Alroy, John							Energy use of modern terrestrial large mammal communities mirrors Late Pleistocene megafaunal extinctions	Frontiers in Biogeography	English	Article	camera traps; community energy use; macroecology; megafauna; metabolic rate; large mammals; Pleistocene extinctions	basal metabolic rate; body-size; scaling metabolism; R package; climate; land; evolutionary; biodiversity; uniformity; resolution	Globally, large mammals are in decline. Biological traits including low population densities and longer generation times make them particularly susceptible. Their losses can have wide-ranging ecological consequences, including dramatic reductions in total heterotrophic energy use. To determine the key drivers of variation in energy use, we calculated daily rates of energy flow across the globe fo…	[Carter, Benjamin E.; Alroy, John] Macquarie Univ, Sch Nat Sci, Sydney, NSW 2109, Australia	Macquarie University	Carter, BE (corresponding author), Macquarie Univ, Sch Nat Sci, Sydney, NSW 2109, Australia.	benjamin.carter1@hdr.mq.edu.au	Carter, Benjamin/KUD-2147-2024; Alroy, John/B-4585-2009		Australian Government [20213308, DP210101324]	Australian Government(Australian Government)	We thank Barry Brook and Kate Lyons for helpful advice, and Orlin S. Todorov for valuable assistance in estimating basal metabolic rates using phylogenetic methods. This study was funded through a Research Training Program Scholarship (no. 20213308 awarded to BEC) and a Discovery Project Award from the Australian Government (no. DP210101324 to JA).	87	0	0	3	3	ESCHOLARSHIP PUBL	Oakland	California Digital Library, University of California, 1111 Franklin Street, Oakland, California, UNITED STATES	1948-6596			FRONT BIOGEOGR	Front. Biogeogr.	JUN	2024	16	2			e62724	10.21425/F5FBG62724	http://dx.doi.org/10.21425/F5FBG62724			16
J	Chang, D; Shapiro, B	Chang, Dan; Shapiro, Beth							Using ancient DNA and coalescent-based methods to infer extinction	Biology Letters	English	Article	ancient DNA; megafauna; extinction; coalescent; demography	population genetics; genomes reveal; brown bears; Pleistocene; sequences; replacement; dynamics; history; origin; horse	DNA sequences extracted from preserved remains can add considerable resolution to inference of past population dynamics. For example, coalescent-based methods have been used to correlate declines in some arctic megafauna populations with habitat fragmentation during the last ice age. These methods, however, often fail to detect population declines preceding extinction, most likely owing to a comb…	[Chang, Dan; Shapiro, Beth] Univ Calif Santa Cruz, Dept Ecol & Evolutionary Biol, Santa Cruz, CA 95064 USA	University of California System; University of California Santa Cruz	Shapiro, B (corresponding author), Univ Calif Santa Cruz, Dept Ecol & Evolutionary Biol, Santa Cruz, CA 95064 USA.	bashapir@ucsc.edu		Chang, Dan/0000-0003-4942-3146; Shapiro, Beth/0000-0002-2733-7776	Packard Foundation; NSF [ARC-1417036]	Packard Foundation(The David & Lucile Packard Foundation); NSF(National Science Foundation (NSF))	B.S. and D.C. received support from the Packard Foundation and NSF ARC-1417036.	27	8	8	1	28	ROYAL SOC	LONDON	6-9 CARLTON HOUSE TERRACE, LONDON SW1Y 5AG, ENGLAND	1744-9561	1744-957X		BIOL LETTERS	Biol. Lett.	2001-02-01	2016	12	2			20150822	10.1098/rsbl.2015.0822	http://dx.doi.org/10.1098/rsbl.2015.0822			4
J	Chichkoyan, KV; Martínez-Navarro, B; Moigne, AM; Cioppi, E; Belinchón, M; Lanata, JL	Chichkoyan, Karina V.; Martinez-Navarro, Bienvenido; Moigne, Anne-Marie; Cioppi, Elisabetta; Belinchon, Margarita; Lanata, Jose L.							Description and interpretation of a Megatherium americanum atlas with evidence of human intervention	Rivista Italiana di Paleontologia e Stratigrafia	English	Article	megafauna; human dispersal; Pampean region; taphonomy; museum's collection	Late Pleistocene; Fuego-Patagonia; bone; dispersal; exploitation; extinctions; demography; sequences; transport; butchery	This paper discusses a Megatherium americanum atlas from the Pampas region of Argentina, which is currently housed at the Museo di Storia Naturale di Firenze, Italy. Traces of anthropic cut marks were found on the dorsal and ventral faces of the posterior part, in articulation with the axis. This is the first time that this type of evidence has been documented on this element of this species. The…	[Chichkoyan, Karina V.; Martinez-Navarro, Bienvenido] Inst Catala Paleoecol Humana & Evolucio Social, Zona Educ 4,Campus Selscelades URV,Edifici W 3, Tarragona 43007, Spain; [Chichkoyan, Karina V.; Martinez-Navarro, Bienvenido] Univ Rovira & Virgili, Area Prehist, Tarragona, Spain; [Chichkoyan, Karina V.] Erasmus Mundus PhD Quaternary & Prehist, Rotterdam, Netherlands; [Martinez-Navarro, Bienveni…	ICREA; Universitat Rovira i Virgili; Catalan Institute of Human Paleo-Ecology & Social Evolution (IPHES); Universitat Rovira i Virgili; ICREA; Sorbonne Universite; Museum National d'Histoire Naturelle (MNHN); Centre National de la Recherche Scientifique (CNRS); CNRS - Institute of Ecology & Environment (INEE); University of Florence; Consejo Nacional de Investigaciones Cientificas y Tecnicas (CON…	Martínez-Navarro, B (corresponding author), Inst Catala Paleoecol Humana & Evolucio Social, Zona Educ 4,Campus Selscelades URV,Edifici W 3, Tarragona 43007, Spain.;Martínez-Navarro, B (corresponding author), Univ Rovira & Virgili, Area Prehist, Tarragona, Spain.;Martínez-Navarro, B (corresponding author), ICREA, Pg Lluis Companys 23, Barcelona 08010, Spain.	catkarinavch@gmail.com; bienvenido.martinez@icrea.cat; anne-marie.moigne@cerptautavel.com; elisabetta.cioppi@unifi.it; museociencias@valencia.es; jllanata@conicet.gov.ar	Historical sciences. Philosophy. Religion Series, BULLETIN/AAY-1568-2020; Martinez-Navarro, Bienvenido/L-5950-2014	Martinez-Navarro, Bienvenido/0000-0002-8374-5109	Erasmus Mundus; Spanish Ministry of Economy and Competitiveness [MINECO-CGL2016-80975-P]; Generalitat de Catalunya research group [SGR2014-901]; FONCYT-MINCYT, Argentina [PICT V 2014-1558]; U.S. National Science Foundation [EAR 1148181]; ICREA Funding Source: Custom	Erasmus Mundus; Spanish Ministry of Economy and Competitiveness(Spanish Government); Generalitat de Catalunya research group(Generalitat de Catalunya); FONCYT-MINCYT, Argentina; U.S. National Science Foundation(National Science Foundation (NSF)); ICREA(ICREA)	This essay was financed by the Erasmus Mundus grant inside the International Doctorate in Quaternary and Prehistory program (KVCH), by the Spanish Ministry of Economy and Competitiveness (grant MINECO-CGL2016-80975-P), and by the Generalitat de Catalunya research group SGR2014-901. This contribution is part of the PICT V 2014-1558 Sociedades y Ambientes en Transformacion funded by FONCYT-MINCYT, …	82	1	1	1	10	UNIV STUDI MILANO	MILANO	C/O RIVISTA ITALIANA PALEONTOLOGIA STRATIGRAFIA, VIA MANGIAGALLI, 34, 20133 MILANO, ITALY	0035-6883	2039-4942		RIV ITAL PALEONTOL S	Riv. Ital. Paleontol. Stratigr.	MAR	2017	123	1	51	64		10.13130/2039-4942/8019				14
J	Choquenot, D; Bowman, DMJS	Choquenot, D; Bowman, DMJS							Marsupial megafauna, Aborigines and the overkill hypothesis: application of predator-prey models to the question of Pleistocene extinction in Australia	Global Ecology and Biogeography	English	Article	Australia; Aborigines; megafauna; extinction; modelling; Pleistocene; overkill	radiocarbon determinationas; northern Australia; human colonization; body size; mammals; archaeology	The worldwide extinction of large terrestrial mammals in the late Pleistocene has been attributed to climate change, overkill by human populations colonizing new continents, or some combination of these two processes. Lack of precision in chronologies for human colonization and megafaunal extinction suggests that the role of overkill will be difficult or impossible to resolve from the archaeologi…	Pk & Wildlife Commiss No Terr, Palmerston, NT 0801, Australia; Cooperat Res Ctr Sustainable Dev Trop Savannas, Palmerston, NT 0801, Australia; No Terr Univ, Ctr Indigenous Nat & Cultural Resource Management, Darwin, NT 0909, Australia	Charles Darwin University	Pk & Wildlife Commiss No Terr, POB 496, Palmerston, NT 0801, Australia.	david.choquenot@nt.gov.au	Choquenot, David/D-8016-2013; Bowman, David/A-2930-2011	Bowman, David/0000-0001-8075-124X				75	28	32	11	73	WILEY	HOBOKEN	111 RIVER ST, HOBOKEN 07030-5774, NJ USA	1466-822X	1466-8238		GLOBAL ECOL BIOGEOGR	Glob. Ecol. Biogeogr.	MAY	1998	7	3	167	180		10.1046/j.1466-822X.1998.00285.x	http://dx.doi.org/10.1046/j.1466-822X.1998.00285.x			14
J	Clarkson, C; Jacobs, Z; Marwick, B; Fullagar, R; Wallis, L; Smith, M; Roberts, RG; Hayes, E; Lowe, K; Carah, X; Florin, SA; McNeil, J; Cox, D; Arnold, LJ; Hua, Q; Huntley, J; Brand, HEA; Manne, T; Fairbairn, A; Shulmeister, J; Lyle, L; Salinas, M; Page, M; Connell, K; Park, G; Norman, K; Murphy, T; Pardoe, C	Clarkson, Chris; Jacobs, Zenobia; Marwick, Ben; Fullagar, Richard; Wallis, Lynley; Smith, Mike; Roberts, Richard G.; Hayes, Elspeth; Lowe, Kelsey; Carah, Xavier; Florin, S. Anna; McNeil, Jessica; Cox, Delyth; Arnold, Lee J.; Hua, Quan; Huntley, Jillian; Brand, Helen E. A.; Manne, Tiina; Fairbairn, Andrew; Shulmeister, James; Lyle, Lindsey; Salinas, Makiah; Page, Mara; Connell, Kate; Park, Gayoung…							Human occupation of northern Australia by 65,000 years ago	Nature	English	Article		human colonization; Lake Mungo; New Guinea; luminescence; stratigraphy; archaeology; chronology; settlement; migration; shelter	The time of arrival of people in Australia is an unresolved question. It is relevant to debates about when modern humans first dispersed out of Africa and when their descendants incorporated genetic material from Neanderthals, Denisovans and possibly other hominins. Humans have also been implicated in the extinction of Australia's megafauna. Here we report the results of new excavations conducted…	[Clarkson, Chris; Lowe, Kelsey; Carah, Xavier; Florin, S. Anna; McNeil, Jessica; Cox, Delyth; Manne, Tiina; Fairbairn, Andrew; Norman, Kasih] Univ Queensland, Sch Social Sci, Brisbane, Qld 4072, Australia; [Jacobs, Zenobia; Roberts, Richard G.] Univ Wollongong, Australian Res Council, Ctr Excellence Australian Biodivers & Heritage, Wollongong, NSW 2522, Australia; [Jacobs, Zenobia; Marwick, Ben; …	University of Queensland; University of Wollongong; University of Wollongong; University of Washington; University of Washington Seattle; The University of Notre Dame Australia; University of Notre Dame Australia - Broome Campus; Harvard University; University of Adelaide; University of Adelaide; Australian Nuclear Science & Technology Organisation; Griffith University; Australian Synchrotron; Un…	Clarkson, C (corresponding author), Univ Queensland, Sch Social Sci, Brisbane, Qld 4072, Australia.;Jacobs, Z (corresponding author), Univ Wollongong, Australian Res Council, Ctr Excellence Australian Biodivers & Heritage, Wollongong, NSW 2522, Australia.;Jacobs, Z (corresponding author), Univ Wollongong, Sch Earth & Environm Sci, Ctr Archaeol Sci, Wollongong, NSW 2522, Australia.	c.clarkson@uq.edu.au; zenobia@uow.edu.au	Hua, Quan/F-9593-2014; Jacobs, Zenobia/B-2721-2012; Huntley, Jillian/LQK-7641-2024; brand, helen e a/A-7225-2013; Norman, Kasih/KCK-5604-2024; Manne, Tiina/B-3791-2019; Wallis, Lynley/U-9161-2019; Fullagar, Richard/AAT-1155-2020; Florin, S./AAE-6767-2019; Fairbairn, Andrew/ADI-2854-2022; Roberts, Richard/B-8245-2013; Lowe, Kelsey/H-1826-2014; shulmeister, james/J-2859-2015; Arnold, Lee/J-4356-201…	Roberts, Richard G./0000-0002-0128-4119; Lowe, Kelsey/0000-0002-0857-2877; Jacobs, Zenobia/0000-0001-5424-5837; shulmeister, james/0000-0001-5863-9462; Arnold, Lee/0000-0001-9603-3824; Fullagar, Richard/0000-0003-1047-1466; Smith, Mike/0000-0002-6177-8217; Florin, Stephanie Anna/0000-0001-6229-900X; Wallis, Lynley/0000-0002-9324-8069; Marwick, Ben/0000-0001-7879-4531; Huntley, Jillian/0000-0002-9…	Australian Research Council [DP110102864, FT140100101, DP1092843, FT150100138, FL130100116, DE150101597, FT130100195]; DAAD [A/14/01370]; UW-UQ Trans-Pacific Fellowship; UW Royalty Research Fellowship [65-4630]; AINSE [11877]; Wenner Gren Dissertation Fieldwork Grant [Gr. 9260]; Australian Institute of Nuclear Science and Engineering [13/003, 15/001]; Australian Government's National Collaborativ…	Australian Research Council(Australian Research Council); DAAD(Deutscher Akademischer Austausch Dienst (DAAD)); UW-UQ Trans-Pacific Fellowship; UW Royalty Research Fellowship; AINSE; Wenner Gren Dissertation Fieldwork Grant; Australian Institute of Nuclear Science and Engineering; Australian Government's National Collaborative Research Infrastructure Strategy (NCRIS)(Australian GovernmentDepartme…	The authors are grateful to the custodians of Madjedbebe, the Mirarr Senior Traditional Owners (Y. Margarula and M. Nango) and our research partners (Gundjeihmi Aboriginal Corporation) for permission to carry out this research and publish this paper. We are also grateful to J. O'Brien and D. Vadiveloo for assistance in the field. This research was funded through Australian Research Council grants…	67	585	634	11	227	NATURE PUBLISHING GROUP	LONDON	MACMILLAN BUILDING, 4 CRINAN ST, LONDON N1 9XW, ENGLAND	0028-0836	1476-4687		NATURE	Nature	2020-07-01	2017	547	7663	306	+		10.1038/nature22968	http://dx.doi.org/10.1038/nature22968			20
J	Collevatti, RG; Grattapaglia, D; Hay, JD	Collevatti, RG; Grattapaglia, D; Hay, JD							Evidences for multiple maternal lineages of Caryocar brasiliense populations in the Brazilian Cerrado based on the analysis of chloroplast DNA sequences and microsatellite haplotype variation	Molecular Ecology	English	Article	Caryocar brasiliense; Caryocaraceae; cpDNA; microsatellites; phylogeography; tropical tree	gene flow; Late Quaternary; inheritance; primers; amplification; polymorphism; diversity; genomes; regions; pollen	In this work we report on the phylogeography of the endangered tree species Caryocar brasiliense based on variability in two classes of maternally inherited chloroplast DNA sequences with different rates of molecular evolution. Eleven sequence haplotypes of a noncoding region between the genes trnT and trnF and 21 distinct 10-locus microsatellite haplotypes could be identified in a total of 160 i…	Univ Catolica Brasilia, Posgrad Ciencias Genom, SGAN 916, BR-70790160 Asa Norte, DF, Brazil; EMBRAPA Recursos Genet & Biotecnol, Lab Genet Plantas, BR-70770900 Brasilia, DF, Brazil; Univ Brasilia, Dept Ecol, BR-70910900 Brasilia, DF, Brazil	Universidade Catolica de Brasilia; Empresa Brasileira de Pesquisa Agropecuaria (EMBRAPA); EMBRAPA Genetic Resources & Biotechnology; Universidade de Brasilia	Univ Catolica Brasilia, Posgrad Ciencias Genom, SGAN 916, Mod B, BR-70790160 Asa Norte, DF, Brazil.	rosanegc@pos.ucb.br	Hay, John Du Vall/H-5236-2012; Collevatti, Rosane/D-8673-2013; Grattapaglia, Dario/B-5864-2014	Hay, John Du Vall/0000-0002-9773-7433; Collevatti, Rosane/0000-0002-3733-7059; Grattapaglia, Dario/0000-0002-0050-970X				56	81	83	0	32	WILEY	HOBOKEN	111 RIVER ST, HOBOKEN 07030-5774, NJ USA	0962-1083	1365-294X		MOL ECOL	Mol. Ecol.	JAN	2003	12	1	105	115		10.1046/j.1365-294X.2003.01701.x	http://dx.doi.org/10.1046/j.1365-294X.2003.01701.x			11
J	Collins, CJ; Rawlence, NJ; Prost, S; Anderson, CNK; Knapp, M; Scofield, RP; Robertson, BC; Smith, I; Matisoo-Smith, EA; Chilvers, BL; Waters, JM	Collins, Catherine J.; Rawlence, Nicolas J.; Prost, Stefan; Anderson, Christian N. K.; Knapp, Michael; Scofield, R. Paul; Robertson, Bruce C.; Smith, Ian; Matisoo-Smith, Elizabeth A.; Chilvers, B. Louise; Waters, Jonathan M.							Extinction and recolonization of coastal megafauna following human arrival in New Zealand	Proceedings of the Royal Society B-Biological Sciences	English	Article	aDNA; Phocarctos hookeri; New Zealand; priority effects; extinction	ancient DNA; population genetics; climate; model; working	Extinctions can dramatically reshape biological communities. As a case in point, ancient mass extinction events apparently facilitated dramatic new evolutionary radiations of surviving lineages. However, scientists have yet to fully understand the consequences of more recent biological upheaval, such as the megafaunal extinctions that occurred globally over the past 50 kyr. New Zealand was the wo…	[Collins, Catherine J.; Rawlence, Nicolas J.; Robertson, Bruce C.; Waters, Jonathan M.] Univ Otago, Dept Zool, Allan Wilson Ctr Mol Ecol & Evolut, Dunedin 9016, New Zealand; [Prost, Stefan; Knapp, Michael; Matisoo-Smith, Elizabeth A.] Univ Otago, Dept Anat, Allan Wilson Ctr Mol Ecol & Evolut, Dunedin 9016, New Zealand; [Smith, Ian] Univ Otago, Dept Anthropol & Archaeol, Dunedin 9016, New Zealand;…	University of Otago; University of Otago; University of Otago; Swedish Museum of Natural History; University of California System; University of California Berkeley; University of California System; University of California San Diego; Scripps Institution of Oceanography; Bangor University	Collins, CJ (corresponding author), Univ Otago, Dept Zool, Allan Wilson Ctr Mol Ecol & Evolut, Dunedin 9016, New Zealand.	catherine.collins01@gmail.com	Matisoo-Smith, Lisa/LTE-0777-2024; Waters, Jonathan/B-4983-2009; Chilvers, B./AAV-1965-2021; Smith, Ian/B-6463-2008; Scofield, Richard/A-4271-2011	Smith, Ian/0000-0003-3481-6086; Chilvers, B. Louise/0000-0002-7657-4217; Scofield, Richard/0000-0002-7510-6980; Prost, Stefan/0000-0002-6229-3596; Knapp, Michael/0000-0002-0937-5664; Matisoo-Smith, Elizabeth/0000-0002-3500-8307; Waters, Jonathan/0000-0002-1514-7916	Royal Society of New Zealand Marsden Grant [UOO1112]; Allan Wilson Centre for Molecular Ecology and Evolution; Department of Conservation (DOC) Grant [DOC Inv 4219]	Royal Society of New Zealand Marsden Grant(Royal Society of New ZealandMarsden Fund (NZ)); Allan Wilson Centre for Molecular Ecology and Evolution; Department of Conservation (DOC) Grant	We thank Auckland Museum (Brian Gill), University of Auckland Department of Anthropology (Rod Wallace and Melinda Allen), Museum of New Zealand Te Papa Tongarewa (Alan Tennyson), Canterbury Museum, and Otago University Department of Anthropology and Archaeology (Phil Latham) for bone samples, and the Department of Conservation (Jim Fyfe) for modern P. hookeri samples. Thank you to Ken Miller for …	60	60	61	2	70	ROYAL SOC	LONDON	6-9 CARLTON HOUSE TERRACE, LONDON SW1Y 5AG, ENGLAND	0962-8452	1471-2954		P ROY SOC B-BIOL SCI	Proc. R. Soc. B-Biol. Sci.	2007-07-01	2014	281	1786			20140097	10.1098/rspb.2014.0097	http://dx.doi.org/10.1098/rspb.2014.0097			8
J	Coltorti, M; Della Fazia, J; Rios, FP; Tito, G	Coltorti, Mauro; Della Fazia, Jacopo; Rios, Freddy Paredes; Tito, Giuseppe							The Nuagapua alluvial fan sequence: Early and Late Holocene human-induced changes in the Bolivian Chaco?	Proceedings of the Geologists Association	English	Article; Proceedings Paper	alluvial fan; human impact; mammal extinction; Holocene; Nuagapua; Chaco; Bolivia	Pleistocene mammalian extinctions; Late Quaternary; North-America; South-America; landscape evolution; vegetation changes; Andean Piedmont; human impact; climate; basin	The Quebrada Naguapua alluvial fan provides a record of changes that have affected the Bolivian Chaco during the Holocene. The 4th oldest Unit, possibly related to the last glaciation, is restricted to the fan apex: it was deeply dissected during the Early Holocene, with three other units emplaced within the resultant incision. Sandy sediments characterise Unit 1 and 3 while Unit 2 is a forest so…	[Coltorti, Mauro; Della Fazia, Jacopo] Univ Siena, Dipartimento Sci Terra, I-53100 Siena, Italy; [Rios, Freddy Paredes] Museo Natl Paleontol Arqueol, Tarija, Bolivia; [Tito, Giuseppe] Univ Florence, Dipartimento Sci Terra, I-50121 Florence, Italy	University of Siena; University of Florence	Coltorti, M (corresponding author), Univ Siena, Dipartimento Sci Terra, Via Laterina 8, I-53100 Siena, Italy.	coltorti@unisi.it; dellafazia@unisi.it; museou@uajms.edu.bo						101	17	21	0	8	ELSEVIER SCI LTD	OXFORD	THE BOULEVARD, LANGFORD LANE, KIDLINGTON, OXFORD OX5 1GB, OXON, ENGLAND	0016-7878			P GEOLOGIST ASSOC	Proc. Geol. Assoc.		2010	121	2	218	228		10.1016/j.pgeola.2009.11.003	http://dx.doi.org/10.1016/j.pgeola.2009.11.003			11
J	Coltorti, M; Ficcarelli, G; Jahren, H; Espinosa, MM; Rook, L; Torre, D	Coltorti, M; Ficcarelli, G; Jahren, H; Espinosa, MM; Rook, L; Torre, D							The last occurrence of Pleistocene megafauna in the Ecuadorian Andes	Journal of South American Earth Sciences	English	Article		northern Ecuador; Haplomastodon; record	The latest Pleistocene-Holocene megafauna extinction is a global event, particularly dramatic in the Americas. In a previous paper the authors hypothesised a scenario for this extinction event in South America, where mastodonts first suffered from the changing climate environment, followed by the mylodonts and equids. These different latest Pleistocene - Holocene megafauna extinction waves in Ecu…	Univ Siena, Dipartimento Sci Terra, I-53100 Siena, Italy	University of Siena	Univ Florence, Dipartimento Sci Terra, I-50121 Florence, Italy.	paleovert@unifi.it	Rook, Lorenzo/AAA-5014-2019	Rook, Lorenzo/0000-0001-8923-5428				32	24	28	0	11	PERGAMON-ELSEVIER SCIENCE LTD	OXFORD	THE BOULEVARD, LANGFORD LANE, KIDLINGTON, OXFORD OX5 1GB, ENGLAND	0895-9811			J S AM EARTH SCI	J. South Am. Earth Sci.	NOV	1998	11	6	581	586		10.1016/S0895-9811(98)00037-6				6
J	Conroy, KJ; Baker, AG; Jones, VJ; van Hardenbroek, M; Hopla, EJ; Collier, R; Lister, AM; Edwards, ME	Conroy, Keziah J.; Baker, Ambroise G.; Jones, Vivienne J.; van Hardenbroek, Maarten; Hopla, Emma J.; Collier, Robert; Lister, Adrian M.; Edwards, Mary E.							Tracking late-Quaternary extinctions in interior Alaska using megaherbivore bone remains and dung fungal spores	Quaternary Research	English	Article	Beringia; paleoecology; megafauna; herbivore; Sporormiella; Sordaria; coprophilous fungal spores; fossil; Last Glacial Maximum; transition	mammoth steppe; megafaunal extinction; Pleistocene; vegetation; Sporormiella; paleoecology; lake; colonization; communities; dispersal	One major challenge in the study of late-Quaternary extinctions (LQEs) is providing better estimates of past megafauna abundance. To show how megaherbivore population size varied before and after the last extinctions in interior Alaska, we use both a database of radiocarbon-dated bone remains (spanning 25-0 ka) and spores of the obligate dung fungus,Sporormiella,recovered from radiocarbon-dated l…	[Conroy, Keziah J.; Baker, Ambroise G.; Jones, Vivienne J.] UCL, Environm Change Res Ctr, Dept Geog, Gower St, London WC1E 6BT, England; [Conroy, Keziah J.] Leverhulme Ctr Human Evolutionary Studies, Henry Wellcome Bldg,Fitzwilliam St, Cambridge CB2 1QH, England; [Baker, Ambroise G.] Teesside Univ, Sch Hlth & Life Sci, Middlesbrough TS1 3BX, Cleveland, England; [van Hardenbroek, Maarten; Hopla, E…	University of London; University College London; University of Cambridge; University of Teesside; University of Southampton; Newcastle University - UK; Natural History Museum London	Jones, VJ (corresponding author), UCL, Environm Change Res Ctr, Dept Geog, Gower St, London WC1E 6BT, England.;Baker, AG (corresponding author), Teesside Univ, Sch Hlth & Life Sci, Middlesbrough TS1 3BX, Cleveland, England.	a.baker@tees.ac.uk; vivienne.jones@ucl.ac.uk	Baker, Ambroise/AAA-3997-2020; van Hardenbroek, Maarten/R-1590-2017; Baker, Ambroise/B-8106-2015	van Hardenbroek, Maarten/0000-0001-6330-6363; Baker, Ambroise/0000-0001-7196-1405	NERC [GR3/12599, NE/D003105/1, NE/K000306/1]; NERC Radiocarbon Facility [NRCF010001, 1726.0813, 1847.1014]; NERC [NE/K000306/1, NE/D003105/1, NE/G005982/1, NE/P002536/1] Funding Source: UKRI	NERC(UK Research & Innovation (UKRI)Natural Environment Research Council (NERC)); NERC Radiocarbon Facility(UK Research & Innovation (UKRI)Natural Environment Research Council (NERC)); NERC(UK Research & Innovation (UKRI)Natural Environment Research Council (NERC))	This work was funded by NERC; Lakes and the arctic carbon cycle NE/K000306/1. Radiocarbon dating was supported by the NERC Radiocarbon Facility NRCF010001 (allocation numbers 1726.0813 and 1847.1014), and we kindly acknowledge the efforts of Dr. Charlotte Bryant. Tony Stuart kindly shared some dates from the Lister/Stuart megafaunal extinctions project (NERC grants GR3/12599 and NE/D003105/1). We…	76	7	8	0	23	CAMBRIDGE UNIV PRESS	NEW YORK	32 AVENUE OF THE AMERICAS, NEW YORK, NY 10013-2473 USA	0033-5894	1096-0287		QUATERNARY RES	Quat. Res.	SEP	2020	97		99	110	PII S0033589420000198	10.1017/qua.2020.19	http://dx.doi.org/10.1017/qua.2020.19		http://dx.doi.org/10.1111/ele.13911	12
S	Cooke, SB; Dávalos, LM; Mychajliw, AM; Turvey, ST; Upham, NS	Cooke, Siobhan B.; Davalos, Liliana M.; Mychajliw, Alexis M.; Turvey, Samuel T.; Upham, Nathan S.							Anthropogenic Extinction Dominates Holocene Declines of West Indian Mammals	Annual Review of Ecology, Evolution, and Systematics	English	Review; Book Chapter	extinction; Caribbean; West Indies; Holocene; megafauna; mammal; Quaternary	species diversity; bat Chiroptera; life history; body-size; conservation; taxonomy; model; risk; Phyllostomidae; biodiversity	The extensive postglacial mammal losses in the West Indies provide an opportunity to evaluate extinction dynamics, but limited data have hindered our ability to test hypotheses. Here, we analyze the tempo and dynamics of extinction using a novel data set of faunal last-appearance dates and human first-appearance dates, demonstrating widespread overlap between humans and now-extinct native mammals…	[Cooke, Siobhan B.] Johns Hopkins Univ, Sch Med, Ctr Funct Anat & Evolut, Baltimore, MD 21205 USA; [Davalos, Liliana M.] SUNY Stony Brook, Dept Ecol & Evolut, Stony Brook, NY 11794 USA; [Davalos, Liliana M.] SUNY Stony Brook, Inst Adv Computat Sci, Stony Brook, NY 11794 USA; [Mychajliw, Alexis M.] Stanford Univ, Dept Biol, Stanford, CA 94305 USA; [Mychajliw, Alexis M.] Nat Hist Museum Los Angeles…	Johns Hopkins University; State University of New York (SUNY) System; Stony Brook University; State University of New York (SUNY) System; Stony Brook University; Stanford University; Zoological Society of London; Yale University; Field Museum of Natural History (Chicago)	Cooke, SB (corresponding author), Johns Hopkins Univ, Sch Med, Ctr Funct Anat & Evolut, Baltimore, MD 21205 USA.	scooke5@jhmi.edu; liliana.davalos-alvarez@stonybrook.edu; amychajl@stanford.edu; samuel.turvey@ioz.ac.uk; nathan.upham@yale.edu	Davalos, Liliana/AEE-7879-2022; Cooke, Siobhan/AFX-8914-2022	Davalos, Liliana/0000-0002-4327-7697; Cooke, Siobhan/0000-0001-8265-6705; Upham, Nathan/0000-0001-5412-9342				123	77	83	2	55	ANNUAL REVIEWS	PALO ALTO	4139 EL CAMINO WAY, PO BOX 10139, PALO ALTO, CA 94303-0897 USA	1543-592X	1545-2069	978-0-8243-1448-4	ANNU REV ECOL EVOL S	Annu. Rev. Ecol. Evol. Syst.		2017	48		301	327		10.1146/annurev-ecolsys-110316-022754	http://dx.doi.org/10.1146/annurev-ecolsys-110316-022754			27
J	Corlett, RT	Corlett, Richard T.							The shifted baseline: Prehistoric defaunation in the tropics and its consequences for biodiversity conservation	Biological Conservation	English	Article	co-extinction; extinction; Pleistocene; megafauna; reintroduction; re-wilding	Late Quaternary extinctions; seed dispersal; climate-change; Pleistocene; elephants; vertebrates; megafauna; evolution; mammals; habitat	The majority of terrestrial ecosystems outside Africa have lost megafaunal vertebrates (>44 kg) since the Middle Pleistocene and most of these extinctions can be attributed to human influence. This review assesses the likely impacts of prehistoric megafaunal extinctions in the lowland tropics and discusses the implications for contemporary conservation management. The most likely impacts include:…	Chinese Acad Sci, Xishuangbanna Trop Bot Garden, Menglun 666303, Yunnan, Peoples R China	Chinese Academy of Sciences; Xishuangbanna Tropical Botanical Garden, CAS	Corlett, RT (corresponding author), Chinese Acad Sci, Xishuangbanna Trop Bot Garden, Menglun 666303, Yunnan, Peoples R China.	corlett@xtbg.org.cn	Corlett, Richard/S-2899-2019	Corlett, Richard/0000-0002-2508-9465				110	62	73	0	162	ELSEVIER SCI LTD	OXFORD	THE BOULEVARD, LANGFORD LANE, KIDLINGTON, OXFORD OX5 1GB, OXON, ENGLAND	0006-3207	1873-2917		BIOL CONSERV	Biol. Conserv.	JUL	2013	163		13	21		10.1016/j.biocon.2012.11.012	http://dx.doi.org/10.1016/j.biocon.2012.11.012			9
J	Cosgrove, R.	Cosgrove, R.							30,000 years of human colonization in Tasmania - new Pleistocene dates	Science	English	Article			Basal dates of 30,420 years before present (BP) from a limestone cave in the Florentine River valley and 30,840 BP from a sandstone rocksheleter in the Shannon River valley on the edge of the central Tasmanian highlands indicate colonization of Tasmania 8,000 years earlier than previously thought. These data indicate that people arrived before the Bassian Bridge was exposed about 23,000 years ago…			LA TROBE UNIV, DEPT ARCHAEOL, BUNDOORA, VIC 3083, AUSTRALIA.							20	27	30	1	10	AMER ASSOC ADVANCEMENT SCIENCE	WASHINGTON	1200 NEW YORK AVE, NW, WASHINGTON, DC 20005 USA	0036-8075	1095-9203		SCIENCE	Science	1931-03-01	1989	243	4899	1706	1708		10.1126/science.243.4899.1706	http://dx.doi.org/10.1126/science.243.4899.1706			3
J	Cotte, M; Prevosti, FJ; Hajdas, I; Straccia, P; Scian, D; Soibelzon, L; Bocherens, H	Cotte, Martin; Prevosti, Francisco J.; Hajdas, Irka; Straccia, Pablo; Scian, Daniel; Soibelzon, Leopoldo; Bocherens, Herve							First AMS radiocarbon direct dates on bones from extinct megafauna in Camet Norte (Santa Clara del Mar, Buenos Aires Province, Argentina)	Ameghiniana	English	Editorial Material	AMS radiocarbon dates; Late Pleistocene; pre-LGM; South America	Last Glacial Maximum; Pampean Region; South-America; collagen; Pleistocene; preservation; indicators; signatures; evolution; Patagonia		[Cotte, Martin; Bocherens, Herve] Univ Tubingen, Biogeol, Dept Geosci, Holderlinstr 12, D-72070 Tubingen, Germany; [Prevosti, Francisco J.] Consejo Nacl Invest Cient & Tecn, UNCa, UNLaR,SEGEMAR, Ctr Reg Invest Cient & Transferencia Tecnol La Ri, Entre Rios & Mendoza S-N, RA-5301 Anillaco, La Rioja, Argentina; [Hajdas, Irka] ETH, Lab Ion Beam Phys, Otto Stern Weg 5, CH-8093 Zurich, Switzerland; [S…	Eberhard Karls University of Tubingen; Consejo Nacional de Investigaciones Cientificas y Tecnicas (CONICET); Swiss Federal Institutes of Technology Domain; ETH Zurich; National University of Mar del Plata; National University of La Plata; Museo La Plata; Leibniz Association; Senckenberg Gesellschaft fur Naturforschung (SGN); Eberhard Karls University of Tubingen	Cotte, M (corresponding author), Univ Tubingen, Biogeol, Dept Geosci, Holderlinstr 12, D-72070 Tubingen, Germany.	martin.cotte@uni-tuebingen.de; protocyon@hotmail.com; hajdas@phys.ethz.ch; mmcnp.marchiquita@yahoo.com.ar; lsoibelzon@fcnym.unlp.edu.ar; herve.bocherens@uni-tuebingen.de	BOCHERENS, Herve/F-3580-2011; Hajdas, Irka/C-6696-2011	BOCHERENS, Herve/0000-0002-0494-0126; Prevosti, Francisco/0000-0003-0511-4720; Hajdas, Irka/0000-0003-2373-2725	DFG [BO 3487/4-1]; CONICET [PIP 2011-164, PICT 2015-966]; ANPCyT [PIP 2011-164, PICT 2015-966]	DFG(German Research Foundation (DFG)); CONICET(Consejo Nacional de Investigaciones Cientificas y Tecnicas (CONICET)); ANPCyT(ANPCyT)	Financial support was provided by Project # BO 3487/4-1 of the DFG: Paleoecology and evolution of the carnivorous mammalian faunas of South america from the Late Miocene to the Pleistocene: insights from stable isotopic signatures (13C, 15N, 18O) in fossil bones and teeth. We thank Sirwan ali, Dorothee Drucker, ann-Katrin Fetzer, Bernd Steinhilber, Heinrich Taubald and Christoph Wissing for their…	37	0	0	0	4	ASOCIACION PALEONTOLOGICA ARGENTINA	BUENOS AIRES	MAIPU 645, 1ER PISO, 1006 BUENOS AIRES, ARGENTINA	0002-7014	1851-8044		AMEGHINIANA	Ameghiniana		2018	55	1	126	133		10.5710/AMGH.31.03.2017.3072	http://dx.doi.org/10.5710/AMGH.31.03.2017.3072			8
J	Crees, JJ; Turvey, ST	Crees, Jennifer J.; Turvey, Samuel T.							Holocene extinction dynamics of Equus hydruntinus, a late-surviving European megafaunal mammal	Quaternary Science Reviews	English	Article	European wild ass; Holocene; extinction; megafauna; refugia; Eurasia	Late Pleistocene; glacial refugia; pollen data; history; climate; conservation; mammoths; phylogeography; fragmentation; colonization	The European wild ass (Equus hydruntinus) is a globally extinct Eurasian equid. This species was widespread in Europe and southwest Asia during the Late Pleistocene, but its distribution became restricted to southern Europe and adjacent geographic regions in the Holocene. Previous research on E. hydruntinus has focused predominantly on its taxonomy and Late Pleistocene distribution. However, its …	[Crees, Jennifer J.; Turvey, Samuel T.] Zool Soc London, Inst Zool, London NW1 4RY, England	Zoological Society of London	Crees, JJ (corresponding author), Zool Soc London, Inst Zool, Regents Pk, London NW1 4RY, England.	jennifer.crees@ioz.ac.uk		Crees, Jennifer/0000-0001-9240-1204	Natural Environment Research Council Grant [NE/G011745/1]; Royal Society University Research Fellowship [UF080320]; NERC [NE/G011745/1] Funding Source: UKRI	Natural Environment Research Council Grant(UK Research & Innovation (UKRI)Natural Environment Research Council (NERC)); Royal Society University Research Fellowship(Royal Society); NERC(UK Research & Innovation (UKRI)Natural Environment Research Council (NERC))	We thank Ninna Manaserian for access to Armenian institutional Holocene mammal collections and literature. Funding for this study was provided by a Natural Environment Research Council Grant (NE/G011745/1, Dynamics of large mammal range collapse and extinction: evidence from the Holocene record of Europe) and a Royal Society University Research Fellowship (UF080320, Quaternary mammal extinction d…	131	43	48	1	42	PERGAMON-ELSEVIER SCIENCE LTD	OXFORD	THE BOULEVARD, LANGFORD LANE, KIDLINGTON, OXFORD OX5 1GB, ENGLAND	0277-3791			QUATERNARY SCI REV	Quat. Sci. Rev.	2001-05-01	2014	91		16	29		10.1016/j.quascirev.2014.03.003	http://dx.doi.org/10.1016/j.quascirev.2014.03.003			14
J	Crowley, BE	Crowley, Brooke E.							A refined chronology of prehistoric Madagascar and the demise of the megafauna	Quaternary Science Reviews	English	Article		environmental changes; age calibration; extinct lemurs; diatom record; ancient DNA; forest; cave; Ankilitelo; evolution; Malagasy	The vertebrate community of Madagascar is one of the most unique and diverse on Earth, yet faunal diversity today is just a fraction of that present in the Pleistocene and Early Holocene. An understanding of the chronology of extinction relative to climate change and anthropogenic factors is essential to test hypotheses for extinction. Here, I combine over 200 new radiocarbon dates with published…	[Crowley, Brooke E.] Univ Calif Santa Cruz, Dept Ecol & Evolutionary Biol, Santa Cruz, CA 95064 USA; [Crowley, Brooke E.] Univ Toronto, Dept Anthropol, Toronto, ON M5S 2S2, Canada	University of California System; University of California Santa Cruz; University of Toronto	Crowley, BE (corresponding author), Univ Toronto, Dept Anthropol, 19 Russell St, Toronto, ON M5S 2S2, Canada.	bcrowley@pmc.ucsc.edu		Crowley, Brooke/0000-0002-8462-6806	UCOP/Labs [09-LR-07-115818-DOMN SC 20081267]; NSF [BCS-0129185, BCS-0237388]	UCOP/Labs; NSF(National Science Foundation (NSF))	I thank D.A. Burney and L.R. Godfrey for help in acquiring subfossil samples and for guidance with the palynology and paleontology of Madagascar. Specimens were sampled under collaborative agreements between D.A. Burney, L.R. Godfrey, W.L. Jungers, and the Departement de Paleontologie et d'Anthropologie Biologique, Universite d'Antananarivo (A. Rasoamiaramanana, G. Randria). Additional specimens …	94	118	136	0	56	PERGAMON-ELSEVIER SCIENCE LTD	OXFORD	THE BOULEVARD, LANGFORD LANE, KIDLINGTON, OXFORD OX5 1GB, ENGLAND	0277-3791			QUATERNARY SCI REV	Quat. Sci. Rev.	SEP	2010	29	19-20	2591	2603		10.1016/j.quascirev.2010.06.030	http://dx.doi.org/10.1016/j.quascirev.2010.06.030			13
J	Crowley, BE; Godfrey, LR; Bankoff, RJ; Perry, GH; Culleton, BJ; Kennett, DJ; Sutherland, MR; Samonds, KE; Burney, DA	Crowley, Brooke E.; Godfrey, Laurie R.; Bankoff, Richard J.; Perry, George H.; Culleton, Brendan J.; Kennett, Douglas J.; Sutherland, Michael R.; Samonds, Karen E.; Burney, David A.							Island-wide aridity did not trigger recent megafaunal extinctions in Madagascar	Ecography	English	Article		small mammals; environmental-change; collagen extraction; natural-abundance; stable isotopes; global patterns; giant lemurs; nitrogen; delta N15; forest	Researchers are divided about the relative importance of people versus climate in triggering the Late Holocene extinctions of the endemic large-bodied fauna on the island of Madagascar. Specifically, a dramatic and synchronous decline in arboreal pollen and increase in grass pollen ca 1000 yr ago has been alternatively interpreted as evidence for aridification, increased human activity, or both. …	[Crowley, Brooke E.] Univ Cincinnati, Dept Geog & Anthropol, 500 Geology Phys Bldg, Cincinnati, OH 45220 USA; [Godfrey, Laurie R.] Univ Massachusetts, Dept Anthropol, Amherst, MA 01003 USA; [Bankoff, Richard J.; Perry, George H.; Culleton, Brendan J.; Kennett, Douglas J.] Penn State Univ, Dept Anthropol, University Pk, PA 16802 USA; [Sutherland, Michael R.] New Coll Florida, Data Sci Program, Sar…	University System of Ohio; University of Cincinnati; University of Massachusetts System; University of Massachusetts Amherst; Pennsylvania Commonwealth System of Higher Education (PCSHE); Pennsylvania State University; Pennsylvania State University - University Park; State University System of Florida; New College Florida; Northern Illinois University	Crowley, BE (corresponding author), Univ Cincinnati, Dept Geog & Anthropol, 500 Geology Phys Bldg, Cincinnati, OH 45220 USA.	brooke.crowley@uc.edu	Samonds, Karen/AAL-1766-2021	Bankoff, Richard/0000-0003-4573-9290; Crowley, Brooke/0000-0002-8462-6806; Samonds, Karen/0000-0003-3597-9215	NSF [BCS-1317163, BCS-1460369]; Direct For Social, Behav & Economic Scie; Division Of Behavioral and Cognitive Sci [1317163] Funding Source: National Science Foundation	NSF(National Science Foundation (NSF)); Direct For Social, Behav & Economic Scie; Division Of Behavioral and Cognitive Sci(National Science Foundation (NSF)NSF - Directorate for Social, Behavioral & Economic Sciences (SBE))	We thank G. Gunnell at The Division of Fossil Primates at the Duke Univ. Lemur Center, UMass Amherst Natural History Collections (Anthropology), and the Dept of Paleontology and Biological Anthropology and Laboratory of Vertebrate Paleontology at the Univ. of Antananarivo for providing subfossil material. Thanks also to the late G. Randria and L. Ranivoharimanana for facilitating sample export, a…	91	46	53	1	26	WILEY	HOBOKEN	111 RIVER ST, HOBOKEN 07030-5774, NJ USA	0906-7590	1600-0587		ECOGRAPHY	Ecography	AUG	2017	40	8	901	912		10.1111/ecog.02376	http://dx.doi.org/10.1111/ecog.02376			12
J	Cupper, ML; Duncan, J	Cupper, Matthew L.; Duncan, Jacqui							Last glacial megafaunal death assemblage and early human occupation at Lake Menindee, southeastern Australia	Quaternary Research	English	Article	aeolian dunes; AMS radiocarbon dating; archaeology; Australia; climate change; geomorphology; last glacial aridity; megataunal extinction; Murray-Darling Basin; optically stimulated luminescence dating	Late Pleistocene; Riverine Plain; extinction; quartz; luminescence; single; grains; chronology; drought; history	The Tedford subfossil locality at Lake Menindee preserves a diverse assemblage of marsupials, monotremes and placental rodents. Of the 38 mammal taxa recorded at the site, almost a third are of extinct megafauna. Some of the bones are articulated or semi-articulated and include almost complete skeletons, indicating that aeolian sediments rapidly buried the animals following death. New optical age…	Univ Melbourne, Sch Earth Sci, Melbourne, Vic 3010, Australia; La Trobe Univ, Dept Archaeol, Bundoora, Vic 3086, Australia	University of Melbourne; La Trobe University	Cupper, ML (corresponding author), Univ Melbourne, Sch Earth Sci, Melbourne, Vic 3010, Australia.	cupper@unimelb.edu.au						66	34	37	1	15	CAMBRIDGE UNIV PRESS	NEW YORK	32 AVENUE OF THE AMERICAS, NEW YORK, NY 10013-2473 USA	0033-5894	1096-0287		QUATERNARY RES	Quat. Res.	SEP	2006	66	2	332	341		10.1016/j.yqres.2006.06.004	http://dx.doi.org/10.1016/j.yqres.2006.06.004			10
J	Dantas, MAT; Pansani, TR; Asevedo, L; Araújo, T; França, LD; de Aragao, WS; Santos, FD; Cravo, E; Waldherr, FR; Ximenes, CL	Dantas, Mario Andre Trindade; Pansani, Thais Rabito; Asevedo, Lidiane; Araujo, Thaisa; de Melo Franca, Lucas; de Aragao, Wilcilene Santos; da Silva Santos, Franciely; Cravo, Elisa; Waldherr, Felipe Rodrigues; Ximenes, Celso Lira							Potential historically intertropical stable areas during the Late Quaternary of South America	Journal of Quaternary Science	English	Article	biogeography; BIR; dry seasonal forests; Late Pleistocene; megafauna	ancient feeding ecology; dry tropical forests; Late Pleistocene; nice; paleoecology; megamammals; history; climate; mammals; paleobiogeography	South America is a pivotal paleontological setting for Late Quaternary megafaunal research. Nonetheless, its paleobiogeography and paleoecology, and the causes for the recent extinction of megafauna in the Late Pleistocene/Early Holocene are not yet fully understood. This study aimed to investigate the potential geographical distribution and historically intertropical stable areas (HISAs) of Sout…	[Dantas, Mario Andre Trindade; Asevedo, Lidiane; de Melo Franca, Lucas] Univ Fed Bahia IMS CAT, Lab Ecol & Geociencias, Vitoria Da Conquista, BA, Brazil; [Dantas, Mario Andre Trindade; Asevedo, Lidiane; de Melo Franca, Lucas] Univ Fed Sergipe, Programa Posgrad Ecol & Conservacao, Sao Cristovao, SE, Brazil; [Pansani, Thais Rabito] Smithsonian Inst, Dept Anthropol, Natl Museum Nat Hist, Washington,…	Universidade Federal de Sergipe; Smithsonian Institution; Smithsonian National Museum of Natural History; Universidade Federal do Rio de Janeiro; Universidade Federal de Sergipe; Universidade Federal do Ceara; Universidade Federal do Rio de Janeiro; Universidade do Estado do Rio de Janeiro	Dantas, MAT (corresponding author), Univ Fed Bahia IMS CAT, Lab Ecol & Geociencias, Vitoria Da Conquista, BA, Brazil.;Dantas, MAT (corresponding author), Univ Fed Sergipe, Programa Posgrad Ecol & Conservacao, Sao Cristovao, SE, Brazil.	matdantas@yahoo.com.br	Asevedo, Lidiane/JBI-8221-2023; Santos, Filipe/M-7709-2013; Pansani, Thaís/IYT-1321-2023; Dantas, Mario/X-9757-2019	Rabito Pansani, Thais/0000-0001-5218-8904; , Lidiane/0000-0001-8638-0494; Franca, Lucas/0000-0001-6307-6860	Conselho Nacional de Desenvolvimento Cientfico e Tecnolgico; CNPq	Conselho Nacional de Desenvolvimento Cientfico e Tecnolgico; CNPq(Conselho Nacional de Desenvolvimento Cientifico e Tecnologico (CNPQ))	We thank CNPq for financial support through a research fellowship granted to M.A.T.D.	50	3	3	0	0	WILEY	HOBOKEN	111 RIVER ST, HOBOKEN 07030-5774, NJ USA	0267-8179	1099-1417		J QUATERNARY SCI	J. Quat. Sci.	NOV	2024	39	8	1154	1159		10.1002/jqs.3624	http://dx.doi.org/10.1002/jqs.3624		2024-05-01	6
J	Dantas, VL; Pausas, JG	Dantas, Vinicius L.; Pausas, Juli G.							The legacy of the extinct Neotropical megafauna on plants and biomes	Nature Communications	English	Article		Late Pleistocene; African; herbivores; savanna; availability; consequences; disturbance; diversity; dynamics; impacts	Large mammal herbivores are important drivers of plant evolution and vegetation patterns, but the extent to which plant trait and ecosystem geography currently reflect the historical distribution of extinct megafauna is unknown. We address this question for South and Central America (Neotropical biogeographic realm) by compiling data on plant defence traits, climate, soil, and fire, as well as on…	[Dantas, Vinicius L.] Fed Univ Uberlandia UFU, Inst Geog, Ave Joao Naves de Avila 2121, BR-38400902 Uberlandia, MG, Brazil; [Pausas, Juli G.] Spanish Natl Res Council CIDE CSIC, Ctr Invest Desertificac, Ctra Naquera Km 4-5 IVIA, Valencia 46113, Spain	Consejo Superior de Investigaciones Cientificas (CSIC); University of Valencia; CSIC-GV-UV - Centro de Investigaciones sobre Desertificacion (CIDE)	Dantas, VL (corresponding author), Fed Univ Uberlandia UFU, Inst Geog, Ave Joao Naves de Avila 2121, BR-38400902 Uberlandia, MG, Brazil.	viniciusldantas@gmail.com	Pausas, Juli/C-5794-2008; Dantas, Vinicius/Q-1143-2015	Dantas, Vinicius/0000-0002-6934-3277				60	21	23	2	11	NATURE PORTFOLIO	BERLIN	HEIDELBERGER PLATZ 3, BERLIN, 14197, GERMANY		2041-1723		NAT COMMUN	Nat. Commun.	2010-01-01	2022	13	1			129	10.1038/s41467-021-27749-9	http://dx.doi.org/10.1038/s41467-021-27749-9			13
J	Davis, M	Davis, Matt							What North America's skeleton crew of megafauna tells us about community disassembly	Proceedings of the Royal Society B-Biological Sciences	English	Article	functional diversity; Rancholabrean; community disassembly; extinction; megafauna; Pleistocene	functional diversity indexes; ecosystem-function; biodiversity loss; assemblages; extinctions; bird; Pleistocene; divergence; components; framework	Functional trait diversity is increasingly used to model future changes in community structure despite a poor understanding of community disassembly's effects on functional diversity. By tracking the functional diversity of the North American large mammal fauna through the End-Pleistocene megafaunal extinction and up to the present, I show that contrary to expectations, functionally unique specie…	[Davis, Matt] Aarhus Univ, Dept Biosci, Aarhus, Denmark; [Davis, Matt] Yale Univ, Dept Geol & Geophys, New Haven, CT 06520 USA; [Davis, Matt] Smithsonian Inst, Dept Paleobiol, Natl Museum Nat Hist, Washington, DC 20560 USA	Aarhus University; Yale University; Smithsonian Institution; Smithsonian National Museum of Natural History	Davis, M (corresponding author), Aarhus Univ, Dept Biosci, Aarhus, Denmark.;Davis, M (corresponding author), Yale Univ, Dept Geol & Geophys, New Haven, CT 06520 USA.;Davis, M (corresponding author), Smithsonian Inst, Dept Paleobiol, Natl Museum Nat Hist, Washington, DC 20560 USA.	matt.davis@bios.au.dk			Yale Institute for Biospheric Studies; Geological Society of America; American Society of Mammalogists; Smithsonian Institution Predoctoral Fellowship; Division Of Environmental Biology; Direct For Biological Sciences [1257625] Funding Source: National Science Foundation	Yale Institute for Biospheric Studies; Geological Society of America; American Society of Mammalogists; Smithsonian Institution Predoctoral Fellowship(Smithsonian Institution); Division Of Environmental Biology; Direct For Biological Sciences(National Science Foundation (NSF)NSF - Directorate for Biological Sciences (BIO))	Partial funding for this project came from the Yale Institute for Biospheric Studies, the Geological Society of America, The American Society of Mammalogists and a Smithsonian Institution Predoctoral Fellowship.	51	19	19	1	24	ROYAL SOC	LONDON	6-9 CARLTON HOUSE TERRACE, LONDON SW1Y 5AG, ENGLAND	0962-8452	1471-2954		P ROY SOC B-BIOL SCI	Proc. R. Soc. B-Biol. Sci.	2011-01-01	2017	284	1846			20162116	10.1098/rspb.2016.2116	http://dx.doi.org/10.1098/rspb.2016.2116			7
J	Davoli, M; Monsarrat, S; Pedersen, RO; Scussolini, P; Karger, DN; Normand, S; Svenning, JC	Davoli, Marco; Monsarrat, Sophie; Pedersen, Rasmus Ostergaard; Scussolini, Paolo; Karger, Dirk Nikolaus; Normand, Signe; Svenning, Jens-Christian							Megafauna diversity and functional declines in Europe from the Last Interglacial to the present	Global Ecology and Biogeography	English	Article		large herbivores; extinctions; Pleistocene; plants; size	Aim: Reconstructing megafauna diversity in the past before anthropogenic impacts is crucial for developing targeted restoration strategies. We estimated the diversity and functional decline of European megafauna in the present compared with the nearest in-time climate period analogue to the present but prior to the worldwide diffusion of Homo sapiens.Location: Europe.Time Period: Last Interglacia…	[Davoli, Marco; Monsarrat, Sophie; Pedersen, Rasmus Ostergaard; Normand, Signe; Svenning, Jens-Christian] Aarhus Univ, Ctr Ecol Dynam Novel Biosphere ECONOVO, Dept Biol, DK-8000 Aarhus C, Denmark; [Davoli, Marco; Monsarrat, Sophie; Pedersen, Rasmus Ostergaard; Normand, Signe; Svenning, Jens-Christian] Aarhus Univ, Ctr Biodivers Dynam Changing World BIOCHANGE, Dept Biol, DK-8000 Aarhus C, Denmark;…	Aarhus University; Aarhus University; Sapienza University Rome; Vrije Universiteit Amsterdam; Swiss Federal Institutes of Technology Domain; Swiss Federal Institute for Forest, Snow & Landscape Research	Davoli, M (corresponding author), Aarhus Univ, Ctr Ecol Dynam Novel Biosphere ECONOVO, Dept Biol, DK-8000 Aarhus C, Denmark.;Davoli, M (corresponding author), Aarhus Univ, Ctr Biodivers Dynam Changing World BIOCHANGE, Dept Biol, DK-8000 Aarhus C, Denmark.	marco.davoli@hotmail.com	Scussolini, Paolo/AAA-8133-2019; Pedersen, Rasmus/AAA-2520-2020; Svenning, Jens-Christian/C-8977-2012; Normand, Signe/A-1561-2012; Karger, Dirk Nikolaus/ABD-5181-2021	Scussolini, Paolo/0000-0001-6208-2169; Davoli, Marco/0000-0001-5926-130X; Pedersen, Rasmus/0000-0001-8538-8646; Monsarrat, Sophie/0000-0002-6220-5306; Svenning, Jens-Christian/0000-0002-3415-0862; Normand, Signe/0000-0002-8782-4154; Karger, Dirk Nikolaus/0000-0001-7770-6229	Danish National Research Foundation; European Union's Horizon 2020 research and innovation programme under the Marie Sklodowska-Curie grant agreement; VILLUM FONDEN; ClimEx; BiodivClim ERA-Net COFUND program; Swiss National Science Foundation SNF; [DNRF173]; [813904]; [16549]; [193907]	Danish National Research Foundation(Danmarks Grundforskningsfond); European Union's Horizon 2020 research and innovation programme under the Marie Sklodowska-Curie grant agreement(Marie Curie Actions); VILLUM FONDEN(Villum Fonden); ClimEx; BiodivClim ERA-Net COFUND program; Swiss National Science Foundation SNF(Swiss National Science Foundation (SNSF)); ; ; ;	Danish National Research Foundation, Grant/Award Number: DNRF173; European Union's Horizon 2020 research and innovation programme under the Marie Sklodowska-Curie grant agreement, Grant/Award Number: 813904; VILLUM FONDEN, Grant/Award Number: 16549; WSL internal grant exCHELSA, and ClimEx, and the 2019-2020 BiodivERsA joint call for research proposals, under the BiodivClim ERA-Net COFUND program,…	83	7	7	10	21	WILEY	HOBOKEN	111 RIVER ST, HOBOKEN 07030-5774, NJ USA	1466-822X	1466-8238		GLOBAL ECOL BIOGEOGR	Glob. Ecol. Biogeogr.	JAN	2024	33	1	34	47		10.1111/geb.13778	http://dx.doi.org/10.1111/geb.13778		2023-11-01	14
J	de Carvalho, CN; Figueiredo, S; Muniz, F; Belo, J; Cunha, PP; Baucon, A; Caceres, LM; Rodriguez-Vidal, J	de Carvalho, Carlos Neto; Figueiredo, Silverio; Muniz, Fernando; Belo, Joao; Cunha, Pedro P.; Baucon, Andrea; Caceres, Luis M.; Rodriguez-Vidal, Joaquin							Tracking the last elephants in Europe during the Wurm Pleniglacial: the importance of the Late Pleistocene aeolianite record in SW Iberia	Ichnos-an International Journal for Plant and Animal Traces	English	Article	coastal aeolianites; tracks; straight-tusked elephant; Neanderthals; Iberia	vertebrate tracks; ancient DNA; Neanderthals; eolianites; Gibraltar; site	In his short joint ventures across the world of vertebrate tracks, Richard Bromley recognized the aeolian sands as unsuitable soft substrates for their preservation. Only after his work in the Balearic Islands, a more systematic study of coastal aeolianites worldwide revealed that these depositional systems could preserve a highly important record of behavioural trace fossils for the evolution of…	[de Carvalho, Carlos Neto; Baucon, Andrea] UNESCO Naturtejo Geopk Geol Off Municipal Idanha, Ctr Cultural Raiano, Av Joaquim Morao, P-6060101 Idanha A Nova, Portugal; [de Carvalho, Carlos Neto] Univ Lisbon, Inst D Luiz, FCUL Campo Grande Edificio C1,Piso 1, Lisbon, Portugal; [Figueiredo, Silverio] Polytech Inst Tomar, Estr Serra Tomar, Tomar, Portugal; [Figueiredo, Silverio] Portuguese Ctr Geohis…	Universidade de Lisboa; Instituto Politecnico de Tomar; Universidade de Coimbra; University of Sevilla; Universidade de Coimbra; University of Genoa; Universidad de Huelva; Universidad de Huelva	de Carvalho, CN (corresponding author), UNESCO Naturtejo Geopk Geol Off Municipal Idanha, Ctr Cultural Raiano, Av Joaquim Morao, P-6060101 Idanha A Nova, Portugal.	carlos.praedichnia@gmail.com	Baucon, Andrea/KCY-0773-2024; Cunha, Pedro/O-6959-2015; Caceres, Luis Miguel/C-7111-2015	Cunha, Pedro/0000-0002-9956-4652; Neto de Carvalho, Carlos/0000-0002-3365-6626; Rodriguez-Vidal, Joaquin/0000-0002-9475-3307; Baucon, Andrea/0000-0001-8207-4860; Figueiredo, Silverio/0000-0002-6197-375X; Caceres, Luis Miguel/0000-0002-1381-2476				54	7	7	0	9	TAYLOR & FRANCIS INC	PHILADELPHIA	530 WALNUT STREET, STE 850, PHILADELPHIA, PA 19106 USA	1042-0940	1563-5236		ICHNOS	Ichnos	2002-07-01	2020	27	3	352	360		10.1080/10420940.2020.1744586	http://dx.doi.org/10.1080/10420940.2020.1744586			9
J	de Oliveira, K; Araújo, T; Rotti, A; Mothé, D; Rivals, F; Avilla, LS	de Oliveira, Karoliny; Araujo, Thaisa; Rotti, Alline; Mothe, Dimila; Rivals, Florent; Avilla, Leonardo S.							Fantastic beasts and what they ate: Revealing feeding habits and ecological niche of late Quaternary Macraucheniidae from South America	Quaternary Science Reviews	English	Article	Last Glacial Maximum; Middle Holocene; species niche modeling; enamel microwear; occlusal enamel complexity; Macraucheniidae; Pleistocene; paleogeography; South America; stable isotopes	Last Glacial Maximum; Buenos-Aires Province; carbon-isotope fractionation; occlusal enamel complexity; Patachonica Owen Mammalia; Late Pleistocene-Holocene; environmental history; stable isotopes; Argentina; climate	The extinction of the Quaternary megafauna stands out among the evolutionary history of Cenozoic mammals. In South America, nearly 80% of the megamammals went extinct, including the native ungulates Macrauchenia patachonica and Xenorhinotherium bahiense. Little is known about the causes of the macraucheniids' extinction and their paleobiology. Here, we have reconstructed the dietary habits of M. …	[de Oliveira, Karoliny; Araujo, Thaisa; Rotti, Alline; Mothe, Dimila; Avilla, Leonardo S.] Univ Fed Estado Rio de Janeiro, Lab Mastozool, Inst Biociencias, Ave Pasteur 458,Sala 501, BR-22290240 Rio De Janeiro, RJ, Brazil; [de Oliveira, Karoliny; Avilla, Leonardo S.] Univ Fed Estado Rio de Janeiro, Programa Posgrad Biodiversidade Neotrop, Ave Pasteur 458,Sala 506A, BR-22290240 Rio De Janeiro, RJ, …	Universidade Federal do Estado do Rio de Janeiro; Universidade Federal do Estado do Rio de Janeiro; Universidade Federal do Rio de Janeiro; ICREA; Universitat Rovira i Virgili; Catalan Institute of Human Paleo-Ecology & Social Evolution (IPHES); Universitat Rovira i Virgili	de Oliveira, K (corresponding author), Univ Fed Estado Rio de Janeiro, Lab Mastozool, Inst Biociencias, Ave Pasteur 458,Sala 501, BR-22290240 Rio De Janeiro, RJ, Brazil.	karololiveiranascimento@outlook.com; thaisa.souza@hotmail.com; allinerotti@gmail.com; dimothe@hotmail.com; florent.rivals@icrea.cat; leonardo.avilla@gmail.com	Mothé, Dimila/ABE-8262-2020; Rivals, Florent/B-7962-2014	Mothe, Dimila/0000-0002-4073-5963; de Oliveira, Karoliny/0000-0001-8009-4024; Araujo, Thaisa/0000-0001-7809-6266	Conselho Nacional de Desenvolvimento Cientifico e Tecnologico (CNPq) [PDJ 153536/2016-0]; Fundacao de Amparo a Pesquisa do Estado do Rio de Janeiro (FAPERJ) [202.375/2018, 202.376/2018, E-26/203.086/2019]; Coordenacao de Aperfeicoamento de Pessoal de Nivel Superior (CAPES) [001]	Conselho Nacional de Desenvolvimento Cientifico e Tecnologico (CNPq)(Conselho Nacional de Desenvolvimento Cientifico e Tecnologico (CNPQ)); Fundacao de Amparo a Pesquisa do Estado do Rio de Janeiro (FAPERJ)(Fundacao Carlos Chagas Filho de Amparo a Pesquisa do Estado do Rio De Janeiro (FAPERJ)); Coordenacao de Aperfeicoamento de Pessoal de Nivel Superior (CAPES)(Coordenacao de Aperfeicoamento de P…	The authors thank all curators of the collections who allowed access to the specimens studied here during 2017 and 2018: A. Kramarz (Museo Argentino de Ciencias Naturales 'Bernardino Rivadavia', Buenos Aires), M.A. Reguero (Museo de La Plata, La Plata), C. Cartelle (Museu de Ciencias Naturais of PUC-MINAS, Minas Gerais), U. Cabral (Museu Nacional/UFRJ, Rio de Janeiro) and R. da Silva (Servico Geo…	99	9	9	0	11	PERGAMON-ELSEVIER SCIENCE LTD	OXFORD	THE BOULEVARD, LANGFORD LANE, KIDLINGTON, OXFORD OX5 1GB, ENGLAND	0277-3791			QUATERNARY SCI REV	Quat. Sci. Rev.	2001-03-01	2020	231				106178	10.1016/j.quascirev.2020.106178	http://dx.doi.org/10.1016/j.quascirev.2020.106178			12
J	de Thoisy, B; da Silva, AG; Ruiz-García, M; Tapia, A; Ramirez, O; Arana, M; Quse, V; Paz-Y-Miño, C; Tobler, M; Pedraza, C; Lavergne, A	de Thoisy, Benoit; da Silva, Anders Goncalves; Ruiz-Garcia, Manuel; Tapia, Andres; Ramirez, Oswaldo; Arana, Margarita; Quse, Viviana; Paz-y-Mino, Cesar; Tobler, Mathias; Pedraza, Carlos; Lavergne, Anne							Population history, phylogeography, and conservation genetics of the last Neotropical mega-herbivore, the lowland tapir (Tapirus terrestris)	BMC Evolutionary Biology	English	Article		molecular phylogeography; cytochroma B; speciation; evolution; patterns; diversification; mammals; forest; biogeography; inference	Background: Understanding the forces that shaped Neotropical diversity is central issue to explain tropical biodiversity and inform conservation action; yet few studies have examined large, widespread species. Lowland tapir (Tapirus terrrestris, Perissodactyla, Tapiridae) is the largest Neotropical herbivore whose ancestors arrived in South America during the Great American Biotic Interchange. A …	[de Thoisy, Benoit] Assoc Kwata, Cayenne 97335, French Guiana; [de Thoisy, Benoit; Lavergne, Anne] Inst Pasteur, Lab Interact Virus Hotes, Cayenne, French Guiana; [da Silva, Anders Goncalves] CSIRO Marine & Atmospher Res, Hobart, Tas, Australia; [Ruiz-Garcia, Manuel] Pontificia Univ Javeriana, Lab Genet Poblac Mol Biol Evolut, Fac Ciencias, Bogota, Colombia; [Tapia, Andres] Ctr Fatima, Ctr Tecnol…	Universite Paris Cite; Commonwealth Scientific & Industrial Research Organisation (CSIRO); Pontificia Universidad Javeriana; Universidad Central del Ecuador; Universidad Peruana Cayetano Heredia; National University of the Littoral; Universidad de Las Americas - Ecuador; Universidad de los Andes (Colombia)	de Thoisy, B (corresponding author), Assoc Kwata, BP 672, Cayenne 97335, French Guiana.	benoit@kwata.net	Ruiz-Garcia, Manuel/AAF-8191-2019; da Silva, Anders/A-5172-2010; Tobler, Mathias/AFN-0051-2022; Ramirez, Oswaldo/KPY-2287-2024; Pedraza, Carlos/C-3779-2019	Goncalves da Silva, Anders/0000-0002-2257-8781; Ramirez Baca, Oswaldo/0009-0009-2028-7727; Pedraza, Carlos/0000-0001-7900-903X; Tobler, Mathias/0000-0002-8587-0560; Ruiz-Garcia, Manuel/0000-0003-2820-2950	SPECIES; WWF Network; European Funds (FEDER); FFEM; DGIS; French Ministry of Higher Education and Research; ODEPLAN-UC-PUCE project	SPECIES; WWF Network; European Funds (FEDER)(European Union (EU)); FFEM; DGIS; French Ministry of Higher Education and Research; ODEPLAN-UC-PUCE project	The study was funded by the project SPECIES, funded by WWF Network, European Funds (FEDER), FFEM, the DGIS and the French Ministry of Higher Education and Research andd by the ODEPLAN-UC-PUCE project. Argentinean samples were kindly provided by Zoologico de Roque Saenz Pena; Granja La Esmeralda, and Centro de Rescate de Fauna Autoctona. A. Tapia performed this work to fulfill partial requirements…	121	42	47	2	74	BMC	LONDON	CAMPUS, 4 CRINAN ST, LONDON N1 9XW, ENGLAND	1471-2148			BMC EVOL BIOL	BMC Evol. Biol.	2014-09-01	2010	10				278	10.1186/1471-2148-10-278	http://dx.doi.org/10.1186/1471-2148-10-278			16
J	DeAngelis, JA; Lyman, RL	DeAngelis, Joseph A.; Lyman, R. Lee							Evaluation of the Early Paleo-Indian zooarchaeological record as evidence of diet breadth	Archaeological and Anthropological Sciences	English	Article	early Paleo-Indians; zooarchaeology; megafauna specialist; dietary generalist; taxonomic diversity	Clovis hunting strategies; Late-Pleistocene; Paleoindian exploitation; Great-Plains; body-mass; mammoth; site; variability; extinction; remains	Early Paleo-Indians in North America are historically hypothesized to have been large-game specialists. Despite decades of research, Early Paleo-Indian diets are alternately portrayed as of either specialist or generalist. Though some suggest that these terms are not useful, debate over the nature of these diets continues. Authors who have studied Early Paleo-Indian archaeofaunas from North Ameri…	[DeAngelis, Joseph A.; Lyman, R. Lee] Univ Missouri, Dept Anthropol, 107 Swallow Hall, Columbia, MO 65211 USA; [DeAngelis, Joseph A.] S&ME Inc, 134 Suber Rd, Columbia, SC 29210 USA	University of Missouri System; University of Missouri Columbia	DeAngelis, JA (corresponding author), Univ Missouri, Dept Anthropol, 107 Swallow Hall, Columbia, MO 65211 USA.;DeAngelis, JA (corresponding author), S&ME Inc, 134 Suber Rd, Columbia, SC 29210 USA.	jadeangelis@smeinc.com						98	8	12	0	14	SPRINGER HEIDELBERG	HEIDELBERG	TIERGARTENSTRASSE 17, D-69121 HEIDELBERG, GERMANY	1866-9557	1866-9565		ARCHAEOL ANTHROP SCI	Archaeol. Anthropol. Sci.	APR	2018	10	3	555	570		10.1007/s12520-016-0377-1	http://dx.doi.org/10.1007/s12520-016-0377-1			16
J	Debruyne, R; Chu, G; King, CE; Bos, K; Kuch, M; Schwarz, C; Szpak, P; Gröcke, DR; Matheus, P; Zazula, G; Guthrie, D; Froese, D; Buigues, B; de Marliave, C; Flemming, C; Poinar, D; Fisher, D; Southon, J; Tikhonov, AN; MacPhee, RDE; Poinar, HN	Debruyne, Regis; Chu, Genevieve; King, Christine E.; Bos, Kirsti; Kuch, Melanie; Schwarz, Carsten; Szpak, Paul; Groecke, Darren R.; Matheus, Paul; Zazula, Grant; Guthrie, Dale; Froese, Duane; Buigues, Bernard; de Marliave, Christian; Flemming, Clare; Poinar, Debi; Fisher, Daniel; Southon, John; Tikhonov, Alexei N.; MacPhee, Ross D. E.; Poinar, Hendrik N.							Out of America:: Ancient DNA evidence for a new world origin of late quaternary woolly mammoths	Current Biology	English	Article		Mammuthus primigenius; mitochondrial genome; evolution; extinction; inference; dynamics; steppe	Although the iconic mammoth of the Late Pleistocene, the woolly mammoth (Mammuthus primigenius), has traditionally been regarded as the end point of a single anagenetically evolving lineage, recent paleontological and molecular studies have shown that successive allopatric speciation events must have occurred within Pleistocene Mammuthus in Asia, with subsequent expansion and hybridization betwee…	[Debruyne, Regis; Chu, Genevieve; King, Christine E.; Bos, Kirsti; Kuch, Melanie; Schwarz, Carsten; Szpak, Paul; Poinar, Debi; Poinar, Hendrik N.] McMaster Univ, McMaster Ancient DNA Ctr, Dept Anthropol, Hamilton, ON L8S 4L9, Canada; [Groecke, Darren R.] Univ Durham, Sci Labs, Dept Earth Sci, Durham DH1 3LE, England; [Matheus, Paul] Univ Alaska Fairbanks, Alaska Quaternary Ctr, Fairbanks, AK 9977…	McMaster University; Durham University; University of Alaska System; University of Alaska Fairbanks; University of Alaska System; University of Alaska Fairbanks; University of Alberta; American Museum of Natural History (AMNH); University of Michigan System; University of Michigan; University of California System; University of California Irvine; Russian Academy of Sciences; Zoological Institute …	Poinar, HN (corresponding author), McMaster Univ, McMaster Ancient DNA Ctr, Dept Anthropol, 1280 Main St W, Hamilton, ON L8S 4L9, Canada.	poinarh@mcmaster.ca	Tikhonov, Alexei/G-7478-2016; Debruyne, Régis/G-7839-2011; Froese, Duane/B-6038-2009; Grocke, Darren R./F-4799-2015	Tikhonov, Alexei/0000-0002-7227-5797; Grocke, Darren R./0000-0003-2296-7530; Bos, Kirsten/0000-0003-2937-3006	Human Science Frontier Program, HFSP [00285C/2005]; Natural Science and Engineering Research Council [299103-2004, 288321]; Social Sciences and Humanities Research Council [410-20040579]; National Science Foundation [OPP 0117400]	Human Science Frontier Program, HFSP(Human Frontier Science Program); Natural Science and Engineering Research Council(Natural Sciences and Engineering Research Council of Canada (NSERC)); Social Sciences and Humanities Research Council(Social Sciences & Humanities Research Council of Canada (SSHRC)); National Science Foundation(National Science Foundation (NSF))	We thank the Vuntut Gwitchin Government of Old Crow for their support of this research, D. Liberles and A. Devault for constructive criticism, and J. Christmas and A. Sekuler for institutional support. We thank A. Lister, P. Tassy, and an anonymous reviewer for constructive criticism on an earlier version of this manuscript. R.D. was supported by a fellowship from the Human Science Frontier Progr…	29	106	113	0	30	CELL PRESS	CAMBRIDGE	600 TECHNOLOGY SQUARE, 5TH FLOOR, CAMBRIDGE, MA 02139 USA	0960-9822			CURR BIOL	Curr. Biol.	2009-09-01	2008	18	17	1320	1326		10.1016/j.cub.2008.07.061	http://dx.doi.org/10.1016/j.cub.2008.07.061			7
J	Del Papa, M; De Los Reyes, M; Poiré, DG; Rascovan, N; Jofré, G; Delgado, M	Del Papa, Mariano; De Los Reyes, Martin; Poire, Daniel G.; Rascovan, Nicolas; Jofre, Guillermo; Delgado, Miguel							Anthropic cut marks in extinct megafauna bones from the Pampean region (Argentina) at the last glacial maximum	Plos ONE	English	Article		Archaeofauna; Criteria; Mammalia; America; North; Site; Age	The initial peopling of South America is a topic of intense archaeological debate. Among the most contentious issues remain the nature of the human-megafauna interaction and the possible role of humans, along with climatic change, in the extinction of several megamammal genera at the end of the Pleistocene. In this study, we present the analysis of fossil remains with cutmarks belonging to a spec…	[Del Papa, Mariano; Delgado, Miguel] Univ Nacl La Plata, Fac Ciencias Nat & Museo, Div Antropol, La Plata, Argentina; [De Los Reyes, Martin] Univ Nacl La Plata, Fac Ciencias Nat & Museo, Div Paleontol Vertebrados, La Plata, Argentina; [De Los Reyes, Martin] Inst Antartico Argentino IAA, 25 Mayo 1143, San Martin, Buenos Aires, Argentina; [Poire, Daniel G.; Delgado, Miguel] Consejo Nacl Invest Cien…	National University of La Plata; Museo La Plata; National University of La Plata; Museo La Plata; Consejo Nacional de Investigaciones Cientificas y Tecnicas (CONICET); Consejo Nacional de Investigaciones Cientificas y Tecnicas (CONICET); Centre National de la Recherche Scientifique (CNRS); Pasteur Network; Universite Paris Cite; Institut Pasteur Paris; Fudan University; Fudan University; Fudan Un…	Delgado, M (corresponding author), Univ Nacl La Plata, Fac Ciencias Nat & Museo, Div Antropol, La Plata, Argentina.;Delgado, M (corresponding author), Consejo Nacl Invest Cient & Tecn CONICET, Buenos Aires, Argentina.;Delgado, M (corresponding author), Fudan Univ, Sch Life Sci, Minist Educ, Key Lab Contemporary Anthropol, Shanghai, Peoples R China.;Delgado, M (corresponding author), Fudan Univ, S…	medelgado@fcnym.unlp.edu.ar	Calvo-Flores, Miguel/B-1842-2012	Poire, Daniel G./0000-0003-0966-122X; Delgado, Miguel/0000-0001-6221-1186	National Natural Science Foundation of China [31771393]; Wenner-Gren Foundation for Anthropological Research (USA) [9391]; Consejo Nacional de Investigaciones Cientificas y Tecnicas (CONICET); Facultad de Ciencias Naturales y Museo Universidad Nacional de La Plata (FCNyM, UNLP); INCEPTION program (Investissement d'Avenir grant) [ANR-16-CONV-0005]; ERC-2020-STG - PaleoMetAmerica [948800]; European…	National Natural Science Foundation of China(National Natural Science Foundation of China (NSFC)); Wenner-Gren Foundation for Anthropological Research (USA); Consejo Nacional de Investigaciones Cientificas y Tecnicas (CONICET)(Consejo Nacional de Investigaciones Cientificas y Tecnicas (CONICET)); Facultad de Ciencias Naturales y Museo Universidad Nacional de La Plata (FCNyM, UNLP); INCEPTION prog…	Work leading to this publication was funded by grants from National Natural Science Foundation of China (#31771393), Wenner-Gren Foundation for Anthropological Research (USA) Grant/Award number 9391, Consejo Nacional de Investigaciones Cientificas y Tecnicas (CONICET), Facultad de Ciencias Naturales y Museo Universidad Nacional de La Plata (FCNyM, UNLP), INCEPTION program (Investissement d'Avenir…	110	1	1	2	2	PUBLIC LIBRARY SCIENCE	SAN FRANCISCO	1160 BATTERY STREET, STE 100, SAN FRANCISCO, CA 94111 USA	1932-6203			PLOS ONE	PLoS One	2017-07-01	2024	19	7			e0304956	10.1371/journal.pone.0304956	http://dx.doi.org/10.1371/journal.pone.0304956			32
J	Dembitzer, J; Barkai, R; Ben-Dor, M; Meiri, S	Dembitzer, Jacob; Barkai, Ran; Ben-Dor, Miki; Meiri, Shai							Levantine overkill: 1.5 million years of hunting down the body size distribution	Quaternary Science Reviews	English	Article	Levant; megafauna; early humans; hunting; Pleistocene; Quaternary; climate	open-air site; mortality profiles; Acheulean site; faunal remains; climate-change; Cape Province; Qesem cave; Pleistocene; extinction; humans	Multiple large-bodied species went extinct during the Pleistocene. Changing climates and/or human hunting are the main hypotheses used to explain these extinctions. We studied the causes of Pleistocene extinctions in the Southern Levant, and their subsequent effect on local hominin food spectra, by examining faunal remains in archaeological sites across the last 1.5 million years. We examined whe…	[Dembitzer, Jacob; Meiri, Shai] Tel Aviv Univ, Sch Zool, IL-6997801 Tel Aviv, Israel; [Barkai, Ran; Ben-Dor, Miki] Tel Aviv Univ, Dept Archaeol & Near Eastern Cultures, IL-6997801 Tel Aviv, Israel; [Meiri, Shai] Tel Aviv Univ, Steinhardt Museum Nat Hist, IL-6997801 Tel Aviv, Israel	Tel Aviv University; Tel Aviv University; Tel Aviv University	Dembitzer, J (corresponding author), Tel Aviv Univ, Sch Zool, IL-6997801 Tel Aviv, Israel.	jacobd@mail.tau.ac.il; barkaran@tauex.tau.ac.il; bendor.michael@gmail.com; uncshai@gmail.com	Dembitzer, Jacob/KHT-3850-2024; Meiri, Shai/D-2403-2010	Meiri, Shai/0000-0003-3839-6330; Dembitzer, Jacob/0000-0003-0893-4361; Ben-Dor, Miki/0000-0001-9512-1160				84	27	27	7	39	PERGAMON-ELSEVIER SCIENCE LTD	OXFORD	THE BOULEVARD, LANGFORD LANE, KIDLINGTON, OXFORD OX5 1GB, ENGLAND	0277-3791	1873-457X		QUATERNARY SCI REV	Quat. Sci. Rev.	2015-01-01	2022	276				107316	10.1016/j.quascirev.2021.107316	http://dx.doi.org/10.1016/j.quascirev.2021.107316		2021-12-01	10
J	Dembitzer, J; Castiglione, S; Raia, P; Meiri, S	Dembitzer, Jacob; Castiglione, Silvia; Raia, Pasquale; Meiri, Shai							Small brains predisposed Late Quaternary mammals to extinction	Scientific Reports	English	Article		climate change; ice-age; size; overkill; history; encephalization; determinants; megafauna; behavior; America	The Late Quaternary witnessed a dramatic wave of large mammal extinctions, that are usually attributed to either human hunting or climatic change. We hypothesized that the large mammals that survived the extinctions might have been endowed with larger brain sizes than their relatives, which could have conferred enhanced behavioral plasticity and the ability to cope with the rapidly changing Late …	[Dembitzer, Jacob; Meiri, Shai] Tel Aviv Univ, Sch Zool, IL-6997801 Tel Aviv, Israel; [Castiglione, Silvia; Raia, Pasquale] Univ Napoli Federico II, Dipartimento Sci Terra Ambiente & Risorse, I-80126 Naples, Italy; [Meiri, Shai] Tel Aviv Univ, Steinhardt Museum Nat Hist, IL-6997801 Tel Aviv, Israel	Tel Aviv University; University of Naples Federico II; Tel Aviv University	Dembitzer, J (corresponding author), Tel Aviv Univ, Sch Zool, IL-6997801 Tel Aviv, Israel.	jacobd@mail.tau.ac.il	Dembitzer, Jacob/KHT-3850-2024; Castiglione, Silvia/F-6840-2017; Meiri, Shai/D-2403-2010; Raia, Pasquale/I-8600-2012	Castiglione, Silvia/0000-0002-6140-1495; Meiri, Shai/0000-0003-3839-6330; Raia, Pasquale/0000-0002-4593-8006				73	6	7	1	14	NATURE PORTFOLIO	BERLIN	HEIDELBERGER PLATZ 3, BERLIN, 14197, GERMANY	2045-2322			SCI REP-UK	Sci Rep	1931-03-01	2022	12	1			3453	10.1038/s41598-022-07327-9	http://dx.doi.org/10.1038/s41598-022-07327-9			8
J	DeSantis, LRG; Field, JH; Wroe, S; Dodson, JR	DeSantis, Larisa R. G.; Field, Judith H.; Wroe, Stephen; Dodson, John R.							Dietary responses of Sahul (Pleistocene Australia-New Guinea) megafauna to climate and environmental change	Paleobiology	English	Article		dental microwear texture; stable isotope; southwestern Australia; eastern Australia; human occupation; Cuddie Springs; Lake Mungo; extinction; carbon; variability	Throughout the late Quaternary, the Sahul (Pleistocene Australia-New Guinea) vertebrate fauna was dominated by a diversity of large mammals, birds, and reptiles, commonly referred to as megafauna. Since ca. 450-400Ka, approximately 88 species disappeared in Sahul, including kangaroos exceeding 200kg in size, wombat-like animals the size of hippopotamuses, flightless birds, and giant monitor lizar…	[DeSantis, Larisa R. G.] Vanderbilt Univ, Dept Earth & Environm Sci, 221 Kirkland Hall, Nashville, TN 37235 USA; [Field, Judith H.; Wroe, Stephen; Dodson, John R.] Univ New South Wales, Sch Biol Earth & Environm Sci, Sydney, NSW 2052, Australia; [Wroe, Stephen] Univ New England, Sch Environm & Rural Sci, Dept Zool, Armidale, NSW 2351, Australia; [Dodson, John R.] Chinese Acad Sci, Inst Earth Envi…	Vanderbilt University; University of New South Wales Sydney; University of New England; Chinese Academy of Sciences; Institute of Earth Environment, CAS	DeSantis, LRG (corresponding author), Vanderbilt Univ, Dept Earth & Environm Sci, 221 Kirkland Hall, Nashville, TN 37235 USA.	larisa.desantis@vanderbilt.edu	Wroe, Stephen/A-4462-2010; Field, Judith/C-7677-2011	DeSantis, Larisa/0000-0003-1159-9154; Wroe, Stephen/0000-0002-6365-5915; Field, Judith/0000-0001-6807-1858	National Science Foundation [EAR1053839, FAIN1455198]; Australian Research Council [ARC LP211430, DP05579230]; University of New South Wales; University of Sydney; Oak Ridge Associated Universities Ralph E. Powe Junior Faculty Enhancement Award; Vanderbilt University; Directorate For Geosciences; Division Of Earth Sciences [1455198] Funding Source: National Science Foundation	National Science Foundation(National Science Foundation (NSF)); Australian Research Council(Australian Research Council); University of New South Wales; University of Sydney(University of Sydney); Oak Ridge Associated Universities Ralph E. Powe Junior Faculty Enhancement Award; Vanderbilt University; Directorate For Geosciences; Division Of Earth Sciences(National Science Foundation (NSF)NSF - Di…	This work was supported by the National Science Foundation (EAR1053839 and FAIN1455198), the Australian Research Council (ARC LP211430 and DP05579230), the University of New South Wales, the University of Sydney, Oak Ridge Associated Universities Ralph E. Powe Junior Faculty Enhancement Award, and Vanderbilt University (including the Discovery Grant Program). We thank M. Fillios, J. Garvey, R. Ho…	82	38	41	0	71	CAMBRIDGE UNIV PRESS	NEW YORK	32 AVENUE OF THE AMERICAS, NEW YORK, NY 10013-2473 USA	0094-8373	1938-5331		PALEOBIOLOGY	Paleobiology	MAY	2017	43	2	181	195		10.1017/pab.2016.50	http://dx.doi.org/10.1017/pab.2016.50			15
J	DeSantis, LRG; Schubert, BW; Scott, JR; Ungar, PS	DeSantis, Larisa R. G.; Schubert, Blaine W.; Scott, Jessica R.; Ungar, Peter S.							Implications of Diet for the Extinction of Saber-Toothed Cats and American Lions	Plos ONE	English	Article		Rancho La Brea; microwear texture analysis; scanning electron microscopy; dental microwear; large carnivores; feeding behavior; Smilodon fatalis; predatory behavior; killing behavior; Late Pleisotcene	The saber-toothed cat, Smilodon fatalis, and American lion, Panthera atrox, were among the largest terrestrial carnivores that lived during the Pleistocene, going extinct along with other megafauna,12,000 years ago. Previous work suggests that times were difficult at La Brea (California) during the late Pleistocene, as nearly all carnivores have greater incidences of tooth breakage (used to infer…	[DeSantis, Larisa R. G.] Vanderbilt Univ, Dept Earth & Environm Sci, Nashville, TN 37235 USA; [Schubert, Blaine W.] E Tennessee State Univ, Don Sundquist Ctr Excellence Paleontol, Johnson City, TN 37614 USA; [Schubert, Blaine W.] E Tennessee State Univ, Dept Geosci, Johnson City, TN 37614 USA; [Scott, Jessica R.] Univ Arkansas, Dept Sociol & Anthropol, Little Rock, AR 72204 USA; [Ungar, Peter S.]…	Vanderbilt University; East Tennessee State University; East Tennessee State University; University of Arkansas System; University of Arkansas Little Rock; University of Arkansas Fayetteville; University of Arkansas System; University of Arkansas Fayetteville	DeSantis, LRG (corresponding author), Vanderbilt Univ, Dept Earth & Environm Sci, Nashville, TN 37235 USA.	larisa.desantis@vanderbilt.edu		DeSantis, Larisa/0000-0003-1159-9154	Vanderbilt University; East Tennessee State University; University of Arkansas	Vanderbilt University; East Tennessee State University; University of Arkansas	Funding was provided by Vanderbilt University, East Tennessee State University, and the University of Arkansas. The funders had no role in study design, data collection and analysis, decision to publish, or preparation of the manuscript.	57	70	76	0	100	PUBLIC LIBRARY SCIENCE	SAN FRANCISCO	1160 BATTERY STREET, STE 100, SAN FRANCISCO, CA 94111 USA	1932-6203			PLOS ONE	PLoS One	2026-12-01	2012	7	12			e52453	10.1371/journal.pone.0052453	http://dx.doi.org/10.1371/journal.pone.0052453			9
J	DeSantis, LRG; Tracy, RAB; Koontz, CS; Roseberry, JC; Velasco, MC	DeSantis, Larisa R. G.; Tracy, Rachel A. Beavins; Koontz, Cassandra S.; Roseberry, John C.; Velasco, Matthew C.							Mammalian Niche Conservation through Deep Time	Plos ONE	English	Article		Pleistocene extinctions; fossil horses; range shifts; heritability; evolution; size	Climate change alters species distributions, causing plants and animals to move north or to higher elevations with current warming. Bioclimatic models predict species distributions based on extant realized niches and assume niche conservation. Here, we evaluate if proxies for niches (i.e., range areas) are conserved at the family level through deep time, from the Eocene to the Pleistocene. We ana…	[DeSantis, Larisa R. G.; Tracy, Rachel A. Beavins; Roseberry, John C.] Vanderbilt Univ, Dept Earth & Environm Sci, Nashville, TN 37235 USA; [Koontz, Cassandra S.; Velasco, Matthew C.] Vanderbilt Univ, Dept Anthropol, Nashville, TN USA	Vanderbilt University; Vanderbilt University	DeSantis, LRG (corresponding author), Vanderbilt Univ, Dept Earth & Environm Sci, Nashville, TN 37235 USA.	larisa.desantis@vanderbilt.edu		Velasco, Matthew/0000-0001-8784-7076; DeSantis, Larisa/0000-0003-1159-9154	Vanderbilt University	Vanderbilt University	Funding was provided by Vanderbilt University. The funders had no role in study design, data collection and analysis, decision to publish, or preparation of the manuscript.	42	17	20	1	32	PUBLIC LIBRARY SCIENCE	SAN FRANCISCO	1160 BATTERY STREET, STE 100, SAN FRANCISCO, CA 94111 USA	1932-6203			PLOS ONE	PLoS One	2023-04-01	2012	7	4			e35624	10.1371/journal.pone.0035624	http://dx.doi.org/10.1371/journal.pone.0035624			13
J	Di Febbraro, M; Carotenuto, F; Castiglione, S; Russo, D; Loy, A; Maiorano, L; Raia, P	Di Febbraro, Mirko; Carotenuto, Francesco; Castiglione, Silvia; Russo, Danilo; Loy, Anna; Maiorano, Luigi; Raia, Pasquale							Does the jack of all trades fare best? Survival and niche width in Late Pleistocene megafauna	Journal of Biogeography	English	Article	climate change; co-occurrence analysis; global circulation models; megafauna extinction; niche shift; Quaternary mammals; species distribution models	mitochondrial DNA; extinction; mammoths; evolution; overkill; fossils; models; infer; risk	AimWe sought to assess different megafaunal species responses to the intense climatic changes that characterized the end of the Quaternary. LocationEurasia. MethodsWe used species distribution modelling, niche overlap tests and co-occurrence analysis to model climatic niche evolution and change in six different megafauna species, including three extinct (woolly mammoth, woolly rhino and steppe bi…	[Di Febbraro, Mirko; Loy, Anna] Univ Molise, Dipartimento Biosci & Terr DiBT, Pesche, Isernia, Italy; [Carotenuto, Francesco; Castiglione, Silvia; Raia, Pasquale] Univ Napoli Federico II, Dipartimento Sci Terra Ambiente & Risorse DiSTAR, Naples, Italy; [Russo, Danilo] Univ Napoli Federico II, Dipartimento Agr, Sez Biol & Protez Sistemi Agr & Forestali, Wildlife Res Unit,Lab Ecol Appl, Naples, Ita…	University of Molise; University of Naples Federico II; University of Naples Federico II; Sapienza University Rome	Raia, P (corresponding author), Univ Napoli Federico II, Dipartimento Sci Terra Ambiente & Risorse DiSTAR, Naples, Italy.	pasquale.raia@unina.it	Di Febbraro, Mirko/GQA-4462-2022; Carotenuto, Francesco/HPD-2187-2023; Raia, Pasquale/I-8600-2012; Castiglione, Silvia/F-6840-2017; Maiorano, Luigi/A-8637-2008	Di Febbraro, Mirko/0000-0001-8898-7046; Raia, Pasquale/0000-0002-4593-8006; Castiglione, Silvia/0000-0002-6140-1495; Maiorano, Luigi/0000-0002-2957-8979; Carotenuto, Francesco/0000-0001-8343-723X				73	28	28	0	55	WILEY	HOBOKEN	111 RIVER ST, HOBOKEN 07030-5774, NJ USA	0305-0270	1365-2699		J BIOGEOGR	J. Biogeogr.	DEC	2017	44	12	2828	2838		10.1111/jbi.13078	http://dx.doi.org/10.1111/jbi.13078			11
J	Domic, AI; Hixon, SW; Velez, MI; Ivory, SJ; Douglass, KG; Brenner, M; Curtis, JH; Culleton, BJ; Kennett, DJ	Domic, Alejandra I.; Hixon, Sean W.; Velez, Maria I.; Ivory, Sarah J.; Douglass, Kristina G.; Brenner, Mark; Curtis, Jason H.; Culleton, Brendan J.; Kennett, Douglas J.							Influence of Late Holocene Climate Change and Human Land Use on Terrestrial and Aquatic Ecosystems in Southwest Madagascar	Frontiers in Ecology and Evolution	English	Article	agro-pastoralists; environmental change; dry deciduous forest; aquatic ecosystems; herbivore introductions; socio-ecological systems	diatom ecological guilds; megafaunal extinctions; Mikea forest; pollen; level; conservation; variability; archaeology; chronology; management	Madagascar's biota underwent substantial change following human colonization of the island in the Late Holocene. The timing of human arrival and its role in the extinction of megafauna have received considerable attention. However, the impacts of human activities on regional ecosystems remain poorly studied. Here, we focus on reconstructing changes in the composition of terrestrial and aquatic ec…	[Domic, Alejandra I.; Ivory, Sarah J.] Penn State Univ, Dept Geosci, University Pk, PA USA; [Domic, Alejandra I.; Douglass, Kristina G.] Penn State Univ, Dept Anthropol, University Pk, PA USA; [Domic, Alejandra I.; Ivory, Sarah J.] Penn State Univ, Earth & Environm Syst Inst, University Pk, PA USA; [Hixon, Sean W.; Kennett, Douglas J.] Univ Calif Santa Barbara, Dept Anthropol, Santa Barbara, CA 9…	Pennsylvania Commonwealth System of Higher Education (PCSHE); Pennsylvania State University; Pennsylvania State University - University Park; Pennsylvania Commonwealth System of Higher Education (PCSHE); Pennsylvania State University; Pennsylvania State University - University Park; Pennsylvania Commonwealth System of Higher Education (PCSHE); Pennsylvania State University; Pennsylvania State Uni…	Hixon, SW (corresponding author), Univ Calif Santa Barbara, Dept Anthropol, Santa Barbara, CA 93106 USA.	hixon@ucsb.edu		Hixon, Sean/0000-0001-6147-7118; Brenner, Mark/0000-0001-9837-012X; Domic Rivadeneira, Alejandra Iboya/0000-0003-0762-3967	National Science Foundation [GRFP -2015213455, Archaeology DDRI -1838393, NSF-IES 1840968]	National Science Foundation(National Science Foundation (NSF))	Funding of this study was facilitated by National Science Foundation grants GRFP -2015213455 (SH), Archaeology DDRI -1838393 (DK and SH), and NSF-IES 1840968 SI).	118	12	12	1	15	FRONTIERS MEDIA SA	LAUSANNE	AVENUE DU TRIBUNAL FEDERAL 34, LAUSANNE, CH-1015, SWITZERLAND	2296-701X			FRONT ECOL EVOL	Front. Ecol. Evol.	2007-12-01	2021	9				688512	10.3389/fevo.2021.688512	http://dx.doi.org/10.3389/fevo.2021.688512			17
J	Donlan, CJ; Berger, J; Bock, CE; Bock, JH; Burney, DA; Estes, JA; Foreman, D; Martin, PS; Roemer, GW; Smith, FA; Soulé, ME; Greene, HW	Donlan, C. Josh; Berger, Joel; Bock, Carl E.; Bock, Jane H.; Burney, David A.; Estes, James A.; Foreman, Dave; Martin, Paul S.; Roemer, Gary W.; Smith, Felisa A.; Soule, Michael E.; Greene, Harry W.							Pleistocene rewilding:: An optimistic agenda for twenty-first century conservation	American Antiquity	English	Review	carnivores; ecological history; megafauna; predation; reintroduction; taxon substitutions	Late Quaternary extinction; Yellowstone National Park; Lion panthera leo; mitochondrial genome; global extinction; Acinony -jubatus; Asian elephants; feral horses; bold plan; evolution	Large vertebrates are strong interactors in food webs, yet they were lost from most ecosystems after the dispersal of modern humans from Africa and Eurasia. We call for restoration of missing ecological functions and evolutionary potential of lost North American megafauna using extant conspecifics and related taxa. We refer to this restoration as Pleistocene rewilding; it is conceived as carefull…	Cornell Univ, Dept Ecol & Evolutionary Biol, Ithaca, NY 14853 USA; Wildlife Conservat Soc, Teton Field Off, N Amer Program, Teton Valley, ID 83455 USA; Univ Colorado, Dept Ecol & Evolutionary Biol, Boulder, CO 80309 USA; Fordham Univ, Dept Biol Sci, Bronx, NY 10458 USA; Natl Trop Bot Garden, Kalaheo, HI 96741 USA; Univ Calif Santa Cruz, US Geol Survey, Santa Cruz, CA 95060 USA; Rewilding Inst, Al…	Cornell University; Wildlife Conservation Society; University of Colorado System; University of Colorado Boulder; Fordham University; United States Department of the Interior; United States Geological Survey; University of California System; University of California Santa Cruz; University of Arizona; New Mexico State University; University of New Mexico	Donlan, CJ (corresponding author), Cornell Univ, Dept Ecol & Evolutionary Biol, Ithaca, NY 14853 USA.	cjd34@cornell.edu; jberger@wcs.org; carl.bock@colorado.edu; jane.bock@colorado.edu; dburney@ntbg.org; jestes@ucsc.edu; eltigredave@comcast.net; pmartin@geo.arizona.edu; groemer@nmsu.edu; fasmith@unm.edu; rewild@co.tds.net; hwg5@cornell.edu	Smith, Felisa/ABE-6160-2021; Bock, Jane/KSI-8437-2024	Smith, Felisa/0000-0001-6262-436X				263	242	279	6	702	UNIV CHICAGO PRESS	CHICAGO	1427 E 60TH ST, CHICAGO, IL 60637-2954 USA	0003-0147	1537-5323		AM NAT	Am. Nat.	NOV	2006	168	5	660	681		10.1086/508027	http://dx.doi.org/10.1086/508027			22
J	Dortch, J; Cupper, M; Grün, R; Harpley, B; Lee, K; Field, J	Dortch, Joe; Cupper, Matt; Grun, Rainer; Harpley, Bernice; Lee, Kerrie; Field, Judith							The timing and cause of megafauna mass deaths at Lancefield Swamp, south-eastern Australia	Quaternary Science Reviews	English	Article	megafauna; macropods; extinctions; Pleistocene; OSL; ESR; taphonomy; Lancefield Swamp	Late Pleistocene; Late Quaternary; human occupation; climate-change; Lake Mungo; New-Guinea; extinction; quartz; kangaroos; single	Lancefield Swamp, south-eastern Australia, was one of the earliest sites to provoke interest in Pleistocene faunal extinctions in Sahul (Pleistocene Australia-New Guinea). The systematic investigation of the deposit in the early 1970s identified megafaunal remains dominated by the 100-200 kg kangaroo Macropus giganteus titan. Associated radiocarbon ages indicated that the species was extant until…	[Dortch, Joe; Harpley, Bernice; Lee, Kerrie; Field, Judith] Univ Sydney, Dept Archaeol, A22, Sydney, NSW 2006, Australia; [Cupper, Matt] Univ Melbourne, Sch Earth Sci, Melbourne, Vic 3010, Australia; [Grun, Rainer] Australian Natl Univ, Res Sch Earth Sci, Earth Environm, Canberra, ACT 0200, Australia; [Dortch, Joe] Univ Western Australia, Ctr Rock Art Res Management, M257,35 Stirling Highway, Cra…	University of Sydney; University of Melbourne; Australian National University; University of Western Australia; Curtin University; Griffith University; La Trobe University; University of New South Wales Sydney	Dortch, J (corresponding author), Univ Sydney, Dept Archaeol, A22, Sydney, NSW 2006, Australia.;Dortch, J (corresponding author), Univ Western Australia, Ctr Rock Art Res Management, M257,35 Stirling Highway, Crawley, WA 6009, Australia.;Dortch, J (corresponding author), Curtin Univ, TrEnD Lab, Bentley, WA 6101, Australia.	joe.dortch@uwa.edu.au; cupper@unimelb.edu.au; rainer.grun@anu.edu.au; bernicen07@gmail.com; kerrielee35@gmail.com; judith.field@unsw.edu.au	Grun, Rainer/A-1437-2012; Field, Judith/C-7677-2011; Dortch, Joe/C-6296-2014	Field, Judith/0000-0001-6807-1858; Dortch, Joe/0000-0002-0510-5456	Australian Research Council (ARC) [DP0342843]; University of Sydney Sesquicentenary RD Grant; Carlyle Greenwell Bequest; Lancefield Park Management Committee, Office of Aboriginal Affairs Victoria, Department of Environment, Land, Water and Planning (Vic.); Shire of Macedon Ranges; Australian Research Council [DP0342843] Funding Source: Australian Research Council	Australian Research Council (ARC)(Australian Research Council); University of Sydney Sesquicentenary RD Grant; Carlyle Greenwell Bequest; Lancefield Park Management Committee, Office of Aboriginal Affairs Victoria, Department of Environment, Land, Water and Planning (Vic.); Shire of Macedon Ranges; Australian Research Council(Australian Research Council)	We thank members of the Wurundjeri Tribe Land and Heritage Council for the endorsement of our research, which was funded by the Australian Research Council (ARC DP0342843), a University of Sydney Sesquicentenary R&D Grant held by JD, and a Carlyle Greenwell Bequest to BN. We are grateful for the support of the Lancefield Park Management Committee, Office of Aboriginal Affairs Victoria, Department…	124	8	9	3	56	PERGAMON-ELSEVIER SCIENCE LTD	OXFORD	THE BOULEVARD, LANGFORD LANE, KIDLINGTON, OXFORD OX5 1GB, ENGLAND	0277-3791			QUATERNARY SCI REV	Quat. Sci. Rev.	2001-08-01	2016	145		161	182		10.1016/j.quascirev.2016.05.042	http://dx.doi.org/10.1016/j.quascirev.2016.05.042			22
J	dos Santos, RAL; De Deckker, P; Hopmans, EC; Magee, JW; Mets, A; Damsté, JSS; Schouten, S	dos Santos, Raquel A. Lopes; De Deckker, Patrick; Hopmans, Ellen C.; Magee, John W.; Mets, Anchelique; Damste, Jaap S. Sinninghe; Schouten, Stefan							Abrupt vegetation change after the Late Quaternary megafaunal extinction in southeastern Australia	Nature Geoscience	English	Article		climate; ages	A substantial extinction of megafauna occurred in Australia between 50 and 45 kyr ago(1,2), a period that coincides with human colonization of Australia(3). Large shifts in vegetation also occurred around this time, but it is unclear whether the vegetation changes were driven by the human use of fire(4)-and thus contributed to the extinction event-or were a consequence of the loss of megafaunal g…	[dos Santos, Raquel A. Lopes; Hopmans, Ellen C.; Mets, Anchelique; Damste, Jaap S. Sinninghe; Schouten, Stefan] NIOZ Royal Netherlands Inst Sea Res, Dept Marine Organ Biogeochem, NL-1790 AB Den Burg, Netherlands; [De Deckker, Patrick; Magee, John W.] Australian Natl Univ, Res Sch Earth Sci, Canberra, ACT 0200, Australia	Utrecht University; Royal Netherlands Institute for Sea Research (NIOZ); Australian National University	dos Santos, RAL (corresponding author), NIOZ Royal Netherlands Inst Sea Res, Dept Marine Organ Biogeochem, POB 59, NL-1790 AB Den Burg, Netherlands.	stefan.schouten@nioz.nl	Schouten, Stefan/P-4380-2016; Sinninghe Damste, Jaap/F-6128-2011	Hopmans, Ellen/0000-0002-8209-1334; Sinninghe Damste, Jaap/0000-0002-8683-1854	Netherlands Organization of Scientific Research; AINSE [07036]; National Oceans Office and Australian Research Council [MD03-2607]	Netherlands Organization of Scientific Research(Netherlands Organization for Scientific Research (NWO)); AINSE; National Oceans Office and Australian Research Council	We thank J-B. Stuut for assistance in the field and J. Ossebaar, M. Kienhuis, M. Baas, M. Verweij and W. I. C. Rijpstra for analytical assistance. Research funding was provided by a VICI grant to S. S. from the Netherlands Organization of Scientific Research. Core MD03-2607 was obtained with a National Oceans Office and Australian Research Council Discovery grant, both awarded to P. D. D. Y. Balu…	30	45	49	1	122	NATURE PUBLISHING GROUP	NEW YORK	75 VARICK ST, 9TH FLR, NEW YORK, NY 10013-1917 USA	1752-0894	1752-0908		NAT GEOSCI	Nat. Geosci.	AUG	2013	6	8	627	631		10.1038/NGEO1856	http://dx.doi.org/10.1038/NGEO1856			5
S	Doughty, CE	Doughty, Christopher E.							Preindustrial Human Impacts on Global and Regional Environment	Annual Review of Environment and Resources	English	Review; Book Chapter	Anthropocene; fire; Pleistocene megafauna; extinctions; nutrients; early Anthropocene hypothesis	Last Glacial Maximum; fire regimes; climate-change; land use; megafaunal extinction; atmospheric CO2; human appropriation; seed dispersal; cover changes; Holocene	Humans have had an impact on regional and global environments even prior to the Industrial Revolution through anthropogenic fire, agriculture, and the extinction of the Pleistocene megafauna. The preindustrial impact of anthropogenic fire to modify ecosystems and affect climate may have been small because in regions where impacts were once thought to be large, such as in Australia, the evidence n…	Univ Oxford, Environm Change Inst, Sch Geog & Environm, Oxford OX1 3QY, England	University of Oxford	Doughty, CE (corresponding author), Univ Oxford, Environm Change Inst, Sch Geog & Environm, S Parks Rd, Oxford OX1 3QY, England.	chris.doughty@ouce.ox.ac.uk		Doughty, Christopher/0000-0003-3985-7960				142	37	40	2	126	ANNUAL REVIEWS	PALO ALTO	4139 EL CAMINO WAY, PO BOX 10139, PALO ALTO, CA 94303-0897 USA	1543-5938		978-0-8243-2338-7	ANNU REV ENV RESOUR	Annu. Rev. Environ. Resour		2013	38		503	527		10.1146/annurev-environ-032012-095147	http://dx.doi.org/10.1146/annurev-environ-032012-095147			25
J	Doughty, CE; Faurby, S; Svenning, JC	Doughty, Christopher E.; Faurby, Soren; Svenning, Jens-Christian							The impact of the megafauna extinctions on savanna woody cover in South America	Ecography	English	Article		Late Pleistocene; fire regimes; Quaternary; herbivores; diversity; dynamics; forest; north; encroachment; determinants	Has land surface cover in South America been impacted by the loss of most large herbivores following the severe Pleistocene and Early Holocene megafauna extinctions on this continent? Here, we estimate how mean savanna woody biomass may have changed in the Americas following these extinctions by creating an empirical model to understand how large herbivores impact savanna woody biomass. To create…	[Doughty, Christopher E.] Univ Oxford, Environm Change Inst, Sch Geog & Environm, S Parks Rd, Oxford OX1 3QY, England; [Faurby, Soren; Svenning, Jens-Christian] Aarhus Univ, Dept Biosci, Sect Ecoinformat & Biodivers, Ny Munkegade 114, DK-8000 Aarhus C, Denmark	University of Oxford; Aarhus University	Doughty, CE (corresponding author), Univ Oxford, Environm Change Inst, Sch Geog & Environm, S Parks Rd, Oxford OX1 3QY, England.	chris.doughty@ouce.ox.ac.uk	Svenning, Jens-Christian/C-8977-2012	Doughty, Christopher/0000-0003-3985-7960; Faurby, Soren/0000-0002-2974-2628	European Research Council [ERC-2012-StG-310886-HISTFUNC]; John Fell Fund	European Research Council(European Research Council (ERC)); John Fell Fund	JCS was supported by the European Research Council (ERC-2012-StG-310886-HISTFUNC). CED acknowledges funding from the John Fell Fund.	57	59	67	1	66	WILEY	HOBOKEN	111 RIVER ST, HOBOKEN 07030-5774, NJ USA	0906-7590	1600-0587		ECOGRAPHY	Ecography	FEB	2016	39	2	213	222		10.1111/ecog.01593	http://dx.doi.org/10.1111/ecog.01593			10
J	Doughty, CE; Faurby, S; Wolf, A; Malhi, Y; Svenning, JC	Doughty, Christopher E.; Faurby, Soren; Wolf, Adam; Malhi, Yadvinder; Svenning, Jens-Christian							Changing NPP consumption patterns in the Holocene: From megafauna-'liberated' NPP to 'ecological bankruptcy'	Anthropocene Review	English	Article	Anthropocene; ecological bankruptcy; extinctions; HANPP; Holocene; NPP	net primary production; human appropriation; extinctions; terrestrial	There have been vast changes in how net primary production (NPP) has been consumed by humans and animals through the Holocene. Here we ask: how much NPP energy may have become available following the megafauna extinctions? When did humans, through agriculture and livestock, consume more NPP than wild mammals? When did humans and wild mammals use more energy than was available in total NPP in each…	[Doughty, Christopher E.] No Arizona Univ, Flagstaff, AZ USA; [Doughty, Christopher E.; Malhi, Yadvinder] Univ Oxford, Oxford, England; [Faurby, Soren; Svenning, Jens-Christian] Aarhus Univ, Aarhus, Denmark; [Faurby, Soren] Museo Nacl Ciencias Nat, Madrid, Spain; [Wolf, Adam] Princeton Univ, Princeton, NJ 08544 USA	Northern Arizona University; University of Oxford; Aarhus University; Consejo Superior de Investigaciones Cientificas (CSIC); CSIC - Museo Nacional de Ciencias Naturales (MNCN); Princeton University	Doughty, CE (corresponding author), Environm Change Inst, South Parks Rd, Oxford OX1 3QY, England.	chris.doughty@ouce.ox.ac.uk	Malhi, Yadvinder/I-4668-2012; Svenning, Jens-Christian/C-8977-2012	Faurby, Soren/0000-0002-2974-2628				37	8	10	7	30	SAGE PUBLICATIONS INC	THOUSAND OAKS	2455 TELLER RD, THOUSAND OAKS, CA 91320 USA	2053-0196	2053-020X		ANTHROPOCENE REV	Anthr. Rev.	DEC	2016	3	3	174	187		10.1177/2053019616650466	http://dx.doi.org/10.1177/2053019616650466			14
J	Doughty, CE; Prys-Jones, TO; Faurby, S; Abraham, AJ; Hepp, C; Leshyk, V; Fofanov, VY; Nieto, NC; Svenning, JC; Galetti, M	Doughty, Christopher E.; Prys-Jones, Tomos O.; Faurby, Soren; Abraham, Andrew J.; Hepp, Crystal; Leshyk, Victor; Fofanov, Viacheslav Y.; Nieto, Nathan C.; Svenning, Jens-Christian; Galetti, Mauro							Megafauna decline have reduced pathogen dispersal which may have increased emergent infectious diseases	Ecography	English	Article	emergent infectious diseases; extinctions; megafauna	body size; biodiversity; explanation; Quaternary; landscape; diversity; patterns; ecology; range	The Late Quaternary extinctions of megafauna (defined as animal species > 44.5 kg) reduced the dispersal of seeds and nutrients, and likely also microbes and parasites. Here we use body-mass based scaling and range maps for extinct and extant mammal species to show that these extinctions led to an almost seven-fold reduction in the movement of gut-transported microbes, such as Escherichia coli (3…	[Doughty, Christopher E.; Prys-Jones, Tomos O.; Abraham, Andrew J.; Hepp, Crystal; Fofanov, Viacheslav Y.] No Arizona Univ, Sch Informat Comp & Cyber Syst, Flagstaff, AZ 86011 USA; [Faurby, Soren] Univ Gothenburg, Dept Biol & Environm Sci, Gothenburg, Sweden; [Faurby, Soren] Gothenburg Global Biodivers Ctr, Gothenburg, Sweden; [Leshyk, Victor; Nieto, Nathan C.] No Arizona Univ, Dept Biol Sci, Fla…	Northern Arizona University; University of Gothenburg; University of Gothenburg; Northern Arizona University; Aarhus University; Aarhus University; Universidade Estadual Paulista; University of Miami	Doughty, CE (corresponding author), No Arizona Univ, Sch Informat Comp & Cyber Syst, Flagstaff, AZ 86011 USA.	chris.doughty@nau.edu	Svenning, Jens-Christian/C-8977-2012; Galetti, Mauro/M-8751-2013	Doughty, Christopher/0000-0003-3985-7960; Galetti, Mauro/0000-0002-8187-8696; Abraham, Andrew/0000-0001-8625-8851; Faurby, Soren/0000-0002-2974-2628	NASA biodiversity grant [80NSSC19K0206]; Carlsberg Foundation Semper Ardens project MegaPast2Future [CF16-0005]; VILLUM FONDEN [16549]	NASA biodiversity grant; Carlsberg Foundation Semper Ardens project MegaPast2Future; VILLUM FONDEN(Villum Fonden)	We acknowledge support for this work from a NASA biodiversity grant (#80NSSC19K0206). JCS considers this work a contribution to his Carlsberg Foundation Semper Ardens project MegaPast2Future (grant CF16-0005) and to his VILLUM Investigator project 'Biodiversity Dynamics in a Changing World' funded by VILLUM FONDEN (grant 16549).	44	14	18	1	19	WILEY	HOBOKEN	111 RIVER ST, HOBOKEN 07030-5774, NJ USA	0906-7590	1600-0587		ECOGRAPHY	Ecography	AUG	2020	43	8	1107	1117		10.1111/ecog.05209	http://dx.doi.org/10.1111/ecog.05209		2020-04-01	11
J	Doughty, CE; Roman, J; Faurby, S; Wolf, A; Haque, A; Bakker, ES; Malhi, Y; Dunning, JB; Svenning, JC	Doughty, Christopher E.; Roman, Joe; Faurby, Soren; Wolf, Adam; Haque, Alifa; Bakker, Elisabeth S.; Malhi, Yadvinder; Dunning, John B., Jr.; Svenning, Jens-Christian							Global nutrient transport in a world of giants	Proceedings of the National Academy of Sciences of the United States of America	English	Article	biogeochemical cycling; extinctions; megafauna; whales; anadromous fish	Late Pleistocene; whales; extinctions; marine; ecosystems; inlands	The past was a world of giants, with abundant whales in the sea and large animals roaming the land. However, that world came to an end following massive late-Quaternary megafauna extinctions on land and widespread population reductions in great whale populations over the past few centuries. These losses are likely to have had important consequences for broad-scale nutrient cycling, because recent…	[Doughty, Christopher E.; Haque, Alifa; Malhi, Yadvinder] Univ Oxford, Sch Geog & Environm, Environm Change Inst, S Parks Rd, Oxford OX1 3QY, England; [Roman, Joe] Harvard Univ, Organism & Evolutionary Biol, Cambridge, MA 02138 USA; [Roman, Joe] Univ Vermont, Gund Inst Ecol Econ, Burlington, VT 05445 USA; [Faurby, Soren; Svenning, Jens-Christian] Aarhus Univ, Dept Biosci, Sect Ecoinformat & Biodi…	University of Oxford; Harvard University; University of Vermont; Aarhus University; Princeton University; Royal Netherlands Academy of Arts & Sciences; Netherlands Institute of Ecology (NIOO-KNAW); Purdue University System; Purdue University	Doughty, CE (corresponding author), Univ Oxford, Sch Geog & Environm, Environm Change Inst, S Parks Rd, Oxford OX1 3QY, England.	chris.doughty@ouce.ox.ac.uk	Malhi, Yadvinder/I-4668-2012; KNAW, NIOO-KNAW/A-4320-2012; Svenning, Jens-Christian/C-8977-2012; Bakker, Elisabeth/B-7185-2008	Doughty, Christopher/0000-0003-3985-7960; KNAW, NIOO-KNAW/0000-0002-3835-159X; Svenning, Jens-Christian/0000-0002-3415-0862; Faurby, Soren/0000-0002-2974-2628; Bakker, Elisabeth/0000-0002-5900-9136	European Research Council (ERC) [ERC-2012-StG-310886-HISTFUNC]; ERC; Jackson Foundation; Sarah and Daniel Hrdy Visiting Fellowship in Conservation Biology at Harvard University; John Fell Fund	European Research Council (ERC)(European Research Council (ERC)); ERC(European Research Council (ERC)); Jackson Foundation; Sarah and Daniel Hrdy Visiting Fellowship in Conservation Biology at Harvard University; John Fell Fund	A. Zerbini provided helpful comments on whale populations. J.-C.S. was supported by Grant ERC-2012-StG-310886-HISTFUNC from the European Research Council (ERC). Additionally, we consider this article to be a contribution to the Danish National Research Foundation Niels Bohr Professorship Project, Aarhus University Research on the Anthropocene. Y.M. was supported by an ERC Advanced Investigator Aw…	48	307	340	10	217	NATL ACAD SCIENCES	WASHINGTON	2101 CONSTITUTION AVE NW, WASHINGTON, DC 20418 USA	0027-8424			P NATL ACAD SCI USA	Proc. Natl. Acad. Sci. U. S. A.	2026-01-01	2016	113	4	868	873		10.1073/pnas.1502549112	http://dx.doi.org/10.1073/pnas.1502549112			6
J	Doughty, CE; Wolf, A; Field, CB	Doughty, Christopher E.; Wolf, Adam; Field, Christopher B.							Biophysical feedbacks between the Pleistocene megafauna extinction and climate: The first human-induced global warming?	Geophysical Research Letters	English	Article		North America; vegetation; savannas; Holocene; reveals; pollen; cycles; biomes; plant; dates	A large increase in Betula during a narrow 1000 year window, similar to 13,800 years before present (YBP) in Alaska and Yukon corresponded in time with the extinction of mammoths and the arrival of humans. Pollen data indicate the increase in Betula during this time was widespread across Siberia and Beringia. We hypothesize that Betula increased due to a combination of a warming climate and reduc…	[Doughty, Christopher E.; Wolf, Adam; Field, Christopher B.] Carnegie Inst Sci, Dept Global Ecol, Stanford, CA 94305 USA	Carnegie Institution for Science	Doughty, CE (corresponding author), Carnegie Inst Sci, Dept Global Ecol, 260 Panama St, Stanford, CA 94305 USA.	cdoughty@stanford.edu	Field, Christopher/AEN-8826-2022	Doughty, Christopher/0000-0003-3985-7960	Carnegie fellowship; NASA ESS	Carnegie fellowship; NASA ESS(National Aeronautics & Space Administration (NASA))	This work is funded by a Carnegie fellowship (CED) and a NASA ESS fellowship (AW). We thank Julia Pongratz for comments on the manuscript and Joe Berry for advice.	30	80	93	1	69	AMER GEOPHYSICAL UNION	WASHINGTON	2000 FLORIDA AVE NW, WASHINGTON, DC 20009 USA	0094-8276			GEOPHYS RES LETT	Geophys. Res. Lett.	2007-08-01	2010	37				L15703	10.1029/2010GL043985	http://dx.doi.org/10.1029/2010GL043985			5
J	Doughty, CE; Wolf, A; Morueta-Holme, N; Jorgensen, PM; Sandel, B; Violle, C; Boyle, B; Kraft, NJB; Peet, RK; Enquist, BJ; Svenning, JC; Blake, S; Galetti, M	Doughty, Christopher E.; Wolf, Adam; Morueta-Holme, Naia; Jorgensen, Peter M.; Sandel, Brody; Violle, Cyrille; Boyle, Brad; Kraft, Nathan J. B.; Peet, Robert K.; Enquist, Brian J.; Svenning, Jens-Christian; Blake, Stephen; Galetti, Mauro							Megafauna extinction, tree species range reduction, and carbon storage in Amazonian forests	Ecography	English	Article		Janzen Connell model; seed dispersal; feeding ecology; survival; south; diet; consequences; recruitment; herbivores; elephants	During the Late Pleistocene and early Holocene 59 species of South American megafauna went extinct. Their extinction potentially triggered population declines of large-seeded tree species dispersed by the large-bodied frugivores with which they co-evolved, a theory first proposed by Janzen and Martin (1982). We tested this hypothesis using species range maps for 257 South American tree species, c…	[Doughty, Christopher E.] Univ Oxford, Sch Geog & Environm, Environm Change Inst, S Parks Rd, Oxford OX1 3QY, England; [Wolf, Adam] Princeton Univ, Dept Ecol & Evolutionary Biol, Princeton, NJ 08544 USA; [Morueta-Holme, Naia] Univ Calif Berkeley, Dept Integrat Biol, Berkeley, CA 94720 USA; [Morueta-Holme, Naia; Sandel, Brody; Svenning, Jens-Christian] Aarhus Univ, Dept Biosci, Sect Ecoinformat & …	University of Oxford; Princeton University; University of California System; University of California Berkeley; Aarhus University; Missouri Botanical Gardens; Universite PSL; Ecole Pratique des Hautes Etudes (EPHE); Centre National de la Recherche Scientifique (CNRS); CNRS - Institute of Ecology & Environment (INEE); Universite de Montpellier; Universite Paul-Valery; University of Arizona; Univer…	Doughty, CE (corresponding author), Univ Oxford, Sch Geog & Environm, Environm Change Inst, S Parks Rd, Oxford OX1 3QY, England.	chris.doughty@ouce.ox.ac.uk	Sandel, Brody/I-8009-2013; Galetti, Mauro/M-8751-2013; Blake, Stephen/HPE-0562-2023; Morueta-Holme, Naia/J-4952-2013; Enquist, Brian/B-6436-2008; Kraft, Nathan Jared Boardman/A-2817-2012; Svenning, Jens-Christian/C-8977-2012	Morueta-Holme, Naia/0000-0002-0776-4092; Enquist, Brian/0000-0002-6124-7096; Kraft, Nathan Jared Boardman/0000-0001-8867-7806; Galetti, Mauro/0000-0002-8187-8696; Peet, Robert/0000-0003-2823-6587; Svenning, Jens-Christian/0000-0002-3415-0862; Doughty, Christopher/0000-0003-3985-7960	National Centre for Ecological Analysis and Synthesis, a center - National Science Foundation (NSF) [EF-0553768]; Univ. of California, Santa Barbara; State of California; iPlant (NSF) [DBI-0735191]; European Research Council [ERC-2012-StG-310886-HISTFUNC]; Villum Foundation; EliteForsk Award; Aarhus Univ. Research Foundation; John Fell fund; Marie Curie International Outgoing Fellowship within th…	National Centre for Ecological Analysis and Synthesis, a center - National Science Foundation (NSF); Univ. of California, Santa Barbara(University of California System); State of California; iPlant (NSF)(National Science Foundation (NSF)NSF - Directorate for Biological Sciences (BIO)); European Research Council(European Research Council (ERC)); Villum Foundation(Villum Fonden); EliteForsk Award; …	This study was conducted as a part of the BIEN Working Group (principal investigators: BJE, Rick Condit, BB, Steve Dolins, and RKP) supported by the National Centre for Ecological Analysis and Synthesis, a center funded by the National Science Foundation (NSF) (Grant EF-0553768); the Univ. of California, Santa Barbara; and the State of California. The BIEN Working Group was also supported by iPla…	59	88	97	1	104	WILEY	HOBOKEN	111 RIVER ST, HOBOKEN 07030-5774, NJ USA	0906-7590	1600-0587		ECOGRAPHY	Ecography	FEB	2016	39	2	194	203		10.1111/ecog.01587	http://dx.doi.org/10.1111/ecog.01587			10
J	Douglas, K.	Douglas, Kirsty							Skeletons in the cabinet: popular palaeontology and the Pleistocene extinction debate in historical perspective	Alcheringa	English	Article	extinction; debate; knowledge; Australia; megafauna		How can historical examination of the Pleistocene extinction question in Australia shed light on ways that scientific debate is influenced by the cultures of science and extra-scientific concerns? In Europe, investigation of the antiquity of man occurred against the background of the invention of glaciology and its incorporation into Charles Lyell's gradualist paradigm, and speculation about foss…										4														2006	30		115	128		10.1080/03115510609506858				13
J	Drucker, DG	Drucker, Dorothee G.							The Isotopic Ecology of the Mammoth Steppe	Annual Review of Earth and Planetary Sciences	English	Review		Late Quaternary extinctions; Pleistocene bone-collagen; nitrogen stable isotopes; antelope Saiga tatarica; N15 natural-abundance; cave bears; global patterns; woolly mammoth; tracking C13; ancient DNA	The Mammoth Steppe was the dominant terrestrial biome of the Northern Hemisphere during the late Pleistocene. It encompassed a nonanalog community of animals living in a cold and treeless steppe-tundra landscape. The high diversity of species, including megafauna, could be supported by a productive environment. The carbon-13 and nitrogen-15 abundances in bone collagen confirmed that the coexisten…	[Drucker, Dorothee G.] Univ Tubingen, Senckenberg Ctr Human Evolut & Palaeoenvironm, Tubingen, Germany	Eberhard Karls University of Tubingen; Leibniz Association; Senckenberg Gesellschaft fur Naturforschung (SGN)	Drucker, DG (corresponding author), Univ Tubingen, Senckenberg Ctr Human Evolut & Palaeoenvironm, Tubingen, Germany.	dorothee.drucker@ifu.uni-tuebingen.de	Drucker, Dorothee G./E-8900-2011	Drucker, Dorothee G./0000-0003-0854-4371	National Museum of Prehistory at Les Eyzies-de-Tayac; working group of Biogeology at the University of Tubingen; Environmental Archaeology of ArScAn-CNRS UM7041 at Nanterre; Department of Prehistory of the National History Museum of Paris; Department of Early Prehistory and Quaternary Ecology at the University of Tubingen; ZBSA Centre for Baltic and Scandinavian Archaeology at Schleswig; Senckenb…	National Museum of Prehistory at Les Eyzies-de-Tayac; working group of Biogeology at the University of Tubingen; Environmental Archaeology of ArScAn-CNRS UM7041 at Nanterre; Department of Prehistory of the National History Museum of Paris; Department of Early Prehistory and Quaternary Ecology at the University of Tubingen; ZBSA Centre for Baltic and Scandinavian Archaeology at Schleswig; Senckenb…	I am indebted to many colleagues and coauthors, including H. Bocherens, T. Stuart, L. Arppe, M. Germonpre, J. van der Plicht, I. Hajdas, C. Baumann, C. Wi ss ing, J.-J. Cleyet-Merle, S. Madelaine, K. Hobson, A. Bridault, C. Cupillard, T. Ducrocq, Y. Naito, C. Vercoutere, T. Higham, S. Munzel, N. Conard, J. Fellows Yates, B. Starkovich, S. Wolf, M. Krajcarz, M.T. Krajcarz, F. Rivals, G. Wong, J. M…	149	13	13	3	17	ANNUAL REVIEWS	PALO ALTO	4139 EL CAMINO WAY, PO BOX 10139, PALO ALTO, CA 94303-0139 USA	0084-6597	1545-4495		ANNU REV EARTH PL SC	Annu. Rev. Earth Planet. Sci.		2022	50		395	418		10.1146/annurev-earth-100821-081832	http://dx.doi.org/10.1146/annurev-earth-100821-081832			24
J	Emslie, S.D.	Emslie, S.D.							Age and diet of fossil California condors in Grand-Canyon, Arizona	Science	English	Article			A dozen new radiocarbon dates, together with a thorough review of its fossil distribution, shed new light on the time and probable cause of extinction of the California condor, Gymnogyps californianus, in Grand Canyon, Arizona. The radiocarbon data indicate that this species became extinct in Grand Canyon, and other parts of the inland West, more than 10,000 years ago in coincidence with the exti…	UNIV FLORIDA, DEPT ZOOL, GAINESVILLE, FL 32611 USA	State University System of Florida; University of Florida								29	51	59	0	24	AMER ASSOC ADVANCEMENT SCIENCE	WASHINGTON	1200 NEW YORK AVE, NW, WASHINGTON, DC 20005 USA	0036-8075	1095-9203		SCIENCE	Science	2014-08-01	1987	237	4816	768	770		10.1126/science.237.4816.768	http://dx.doi.org/10.1126/science.237.4816.768			3
J	Faith, JT	Faith, J. Tyler							Ungulate community richness, grazer extinctions, and human subsistence behavior in southern Africa's Cape Floral Region	Palaeogeography Palaeoclimatology Palaeoecology	English	Article	Quaternary extinctions; Middle Stone Age; Later Stone Age; environmental change; South Africa; megafauna	Middle Stone Age; Kelders Cave 1; Western Cape; Pinnacle Point; Quaternary glaciation; White Mountains; plant diversity; adaptive change; Klasies River; diet breadth	Precipitation, primary productivity, and herbivore biomass are linked to ungulate richness (the number of species) in African ecosystems. This study compares the richness of late-middle to late Pleistocene and Holocene ungulate assemblages in southern Africa's Cape Floral Region (CFR). Regression analysis demonstrates that Pleistocene ungulate assemblages are significantly richer than their Holoc…	George Washington Univ, Dept Anthropol, Ctr Adv Study Hominid Paleobiol, Washington, DC 20052 USA	George Washington University	Faith, JT (corresponding author), George Washington Univ, Dept Anthropol, Ctr Adv Study Hominid Paleobiol, 2110 G St NW, Washington, DC 20052 USA.	tfaith@gwu.edu	Faith, J./E-7146-2015	Faith, J. Tyler/0000-0002-1101-7161	National Science Foundation [BCS-0824717]	National Science Foundation(National Science Foundation (NSF))	I thank Kay Behrensmeyer, Alison Brooks, Donald Grayson, Curtis Marean, Mindy Zeder, and the anonymous reviewers for their helpful comments on previous versions of this manuscript. I also thank Lewis Owen for pointing out useful references. This study was supported by a National Science Foundation Doctoral Dissertation Improvement Grant (BCS-0824717).	99	42	47	0	31	ELSEVIER	AMSTERDAM	RADARWEG 29, 1043 NX AMSTERDAM, NETHERLANDS	0031-0182	1872-616X		PALAEOGEOGR PALAEOCL	Paleogeogr. Paleoclimatol. Paleoecol.	2015-06-01	2011	306	2025-04-03	219	227		10.1016/j.palaeo.2011.04.025	http://dx.doi.org/10.1016/j.palaeo.2011.04.025			9
J	Faith, JT; O'Connell, JF	Faith, J. Tyler; O'Connell, James F.							Revisiting the late Pleistocene mammal extinction record at Tight Entrance Cave, southwestern Australia	Quaternary Research	English	Article	Quaternary extinctions; megafauna; cimate change; fire; overkill; Sahul	taphonomic analysis; New Guinea; megafauna; continent; humans; variability; impact; fauna, size	Tight Entrance Cave (TEC) in southwestern Australia provides a Pleistocene sequence documenting the extinction of 14 large mammal species. This record has been interpreted as indicating that extinctions did not occur during or before the penultimate glacial maximum (PGM) and that humans played a primary role in the extinctions. However, it remains possible that the majority of extinct megafauna p…	[Faith, J. Tyler] George Washington Univ, Ctr Adv Study Hominid Paleobiol, Dept Anthropol, Washington, DC 20052 USA; [O'Connell, James F.] Univ Utah, Dept Anthropol, Salt Lake City, UT 84112 USA	George Washington University; Utah System of Higher Education; University of Utah	Faith, JT (corresponding author), George Washington Univ, Ctr Adv Study Hominid Paleobiol, Dept Anthropol, 2110 G St NW, Washington, DC 20052 USA.	tfaith@gwu.edu	Faith, J./E-7146-2015	Faith, J. Tyler/0000-0002-1101-7161				40	12	14	1	53	ACADEMIC PRESS INC ELSEVIER SCIENCE	SAN DIEGO	525 B ST, STE 1900, SAN DIEGO, CA 92101-4495 USA	0033-5894			QUATERNARY RES	Quat. Res.	NOV	2011	76	3	397	400		10.1016/j.yqres.2011.08.001	http://dx.doi.org/10.1016/j.yqres.2011.08.001			4
J	Fariña, RA	Farina, Richard A.							Bone surface modifications, reasonable certainty, and human antiquity in the Americas: the case of the Arroyo del Vizcaino site	American Antiquity	English	Article		butchery; marks	Modifications on bone surfaces are taphonomic features that allow, among other aspects of environmental reconstruction, the assessment of human presence. The agents that cause such marks are diverse and of both biotic and abiotic origin. Among the former, marks made by human tools are of paramount importance for archaeologists and paleontologists to identify. Although it is possible to erroneousl…	Fac Ciencias, Secc Paleontol, Montevideo 11400, Uruguay	Universidad de la Republica, Uruguay	Fariña, RA (corresponding author), Fac Ciencias, Secc Paleontol, Igua 4225, Montevideo 11400, Uruguay.	fari-a@fcien.edu.uy	Fariña, Richard/GRF-6009-2022		CSIC, Universidad de la Republica	CSIC, Universidad de la Republica	This is a contribution to the project Prospeccion de nuevos sitios fosiliferos y arqueologicos en el area del Arroyo del Vizcaino, funded by CSIC, Universidad de la Republica. Roberto Bracco was an important influence in developing the ideas conveyed here. Angeles Bert, Patricia Grigny, Christine Lucas, and Luciano Varela read previous versions of this manuscript. I received substantial help with…	26	21	21	0	8	CAMBRIDGE UNIV PRESS	NEW YORK	32 AVENUE OF THE AMERICAS, NEW YORK, NY 10013-2473 USA	0002-7316	2325-5064		AM ANTIQUITY	Am. Antiq.	JAN	2015	80	1	193	200		10.7183/0002-7316.79.4.193	http://dx.doi.org/10.7183/0002-7316.79.4.193			8
J	Fariña, RA; Vizcaíno, SF	Farina, Richard A.; Vizcaino, Sergio F.							Giants beasts updated: A review of new knowledge about the South American megafauna	Journal of Quaternary Science	English	Review; Early Access	extinction; megafauna; palaeobiology; palaeocology; Pleistocene; South America	ground sloths Xenarthra; Late Pleistocene; vertibular system; isotopic insight; stable-isotopes; mass estimation; body mass; Mammalia; site; extinctions	Since the publication of Megafauna: Giant Beasts of Pleistocene South America by Fari & ntilde;a et al. in 2013, much has been published on this fascinating subject. Here, we sum up those contributions according to their aim: taxonomic, geographical and phylogenetic novelty, new approaches to the natural history of those species, and extinction and its aftermath. The traditional centres of intere…	[Farina, Richard A.] Univ Republica, Fac Ciencias, Dept Paleontol, Montevideo, Uruguay; [Farina, Richard A.] Dept Canelones, Serv Acad Univ & Ctr Estudio Paleontol SAUCE P, Santa Isabel S-N, Sauce, Uruguay; [Vizcaino, Sergio F.] Museo La Plata, Div Paleontol Vertebrados, Unidades Invest Anexo Museo, La Plata, Argentina; [Vizcaino, Sergio F.] Consejo Nacl Invest Cient & Tecn CONICET, Buenos Aires,…	Universidad de la Republica, Uruguay; National University of La Plata; Museo La Plata; Consejo Nacional de Investigaciones Cientificas y Tecnicas (CONICET)	Fariña, RA (corresponding author), Univ Republica, Fac Ciencias, Dept Paleontol, Montevideo, Uruguay.;Fariña, RA (corresponding author), Dept Canelones, Serv Acad Univ & Ctr Estudio Paleontol SAUCE P, Santa Isabel S-N, Sauce, Uruguay.	dogor@netgate.com.uy	Fariña, Richard/GRF-6009-2022	Farina, Richard/0000-0003-0898-0333				165	0	0	2	2	WILEY	HOBOKEN	111 RIVER ST, HOBOKEN 07030-5774, NJ USA	0267-8179	1099-1417		J QUATERNARY SCI	J. Quat. Sci.	2024 NOV 10	2024						10.1002/jqs.3663	http://dx.doi.org/10.1002/jqs.3663		2024-11-01	15
J	Faurby, S; Svenning, JC	Faurby, S.; Svenning, J. -C.							Historic and prehistoric human-driven extinctions have reshaped global mammal diversity patterns	Diversity and Distributions	English	Article	extinction; functional diversity; macroecology; mammals; megafauna; phylogenetic diversity	Late Pleistocene; conservation; faunas; continents; strategies; carnivores; constraint; megafauna; support; worlds	AimTo assess the extent to which humans have reshaped Earth's biodiversity, by estimating natural ranges of all late Quaternary mammalian species, and to compare diversity patterns based on these with diversity patterns based on current distributions. LocationGlobally. MethodsWe estimated species, functional and phylogenetic diversity patterns based on natural ranges of all mammalian species (n=5…	[Faurby, S.; Svenning, J. -C.] Aarhus Univ, Dept Biosci, Sect Ecoinformat & Biodivers, DK-8000 Aarhus C, Denmark	Aarhus University	Faurby, S (corresponding author), Aarhus Univ, Dept Biosci, Sect Ecoinformat & Biodivers, Ny Munkegade 114, DK-8000 Aarhus C, Denmark.	faurby@mncn.csic.es	Svenning, Jens-Christian/C-8977-2012	Svenning, Jens-Christian/0000-0002-3415-0862; Faurby, Soren/0000-0002-2974-2628	European Research Council [ERC-2012-StG-310886-HISTFUNC]; Danish Natural Science Research Council [11-115750, 4090-00227]	European Research Council(European Research Council (ERC)); Danish Natural Science Research Council(Danish Natural Science Research Council)	JCS was supported by the European Research Council (ERC-2012-StG-310886-HISTFUNC). SF was supported by the Danish Natural Science Research Council (#11-115750 and #4090-00227). SF estimated the natural distributions of all species with input from JCS. SF performed the analyses. SF and JCS wrote the manuscript.	67	168	177	6	162	WILEY	HOBOKEN	111 RIVER ST, HOBOKEN 07030-5774, NJ USA	1366-9516	1472-4642		DIVERS DISTRIB	Divers. Distrib.	OCT	2015	21	10	1155	1166		10.1111/ddi.12369	http://dx.doi.org/10.1111/ddi.12369			12
J	Faurby, S; Svenning, JC	Faurby, Soren; Svenning, Jens-Christian							The asymmetry in the Great American Biotic Interchange in mammals is consistent with differential susceptibility to mammalian predation	Global Ecology and Biogeography	English	Article	competition; GABI; macroecology; mammals; megafauna extinction; predation	Late Pleistocene; South America; extinctions; diversity; patterns; land; constraint; origin; record; birds	AimOne of the most widely cited natural experiments in biogeography is the Great American Biotic Interchange (GABI). Here, we re-assess the famous asymmetry in the exchange for mammals, with North American clades being much more successful in South America than vice versa. We investigate if this directionality could reflect higher susceptibility to predation in South American mammals rather than …	[Faurby, Soren] CSIC, Museo Nacl Ciencias Nat, Dept Biogeog & Global Change, Calle Jose Gutierrez Abascal 2, E-28006 Madrid, Spain; [Svenning, Jens-Christian] Aarhus Univ, Dept Biosci, Sect Ecoinformat & Biodivers, DK-8000 Aarhus C, Denmark; [Faurby, Soren] Univ Gothenburg, Dept Biol & Environm Sci, Gothenburg, Sweden	Consejo Superior de Investigaciones Cientificas (CSIC); CSIC - Museo Nacional de Ciencias Naturales (MNCN); Aarhus University; University of Gothenburg	Faurby, S (corresponding author), CSIC, Museo Nacl Ciencias Nat, Dept Biogeog & Global Change, Calle Jose Gutierrez Abascal 2, E-28006 Madrid, Spain.	soren.faurby@bioenv.gu.se	Svenning, Jens-Christian/C-8977-2012	Faurby, Soren/0000-0002-2974-2628	Danish Natural Science Research Council [4090-00227]; European Research Council [ERC-2012-StG-310886-HISTFUNC]	Danish Natural Science Research Council(Danish Natural Science Research Council); European Research Council(European Research Council (ERC))	S.F. was supported by the Danish Natural Science Research Council (no. 4090-00227). J.C.S. was supported by the European Research Council (ERC-2012-StG-310886-HISTFUNC). We thank the editor Kathleen Lyons and two anonymous referees for their helpful suggestions on an earlier version of the manuscript.	49	17	18	1	58	WILEY	HOBOKEN	111 RIVER ST, HOBOKEN 07030-5774, NJ USA	1466-822X	1466-8238		GLOBAL ECOL BIOGEOGR	Glob. Ecol. Biogeogr.	DEC	2016	25	12	1443	1453		10.1111/geb.12504	http://dx.doi.org/10.1111/geb.12504			11
J	Ficcarelli, G; Azzaroli, A; Bertini, A; Coltorti, M; Mazza, P; Mezzabotta, C; Espinosa, MM; Rook, L; Torre, D	Ficcarelli, G; Azzaroli, A; Bertini, A; Coltorti, M; Mazza, P; Mezzabotta, C; Espinosa, MM; Rook, L; Torre, D							Hypothesis on the cause of extinction of the South American mastodonts	Journal of South American Earth Sciences		Article			Paleontological, geomorphological and sedimentological investigations on the Cangahua Formation in the Interandean depression of Northern and Central Ecuador have provided information on the evolution of the Andean paleoenvironment during the Late Pleistocene. Pyroclastic and windblown sediments were deposited during cold and dry phases of the last glaciation, interrupted many times by the develo…					Bertini, Adele/KFQ-7894-2024; Mazza, Paul/K-5430-2015; Rook, Lorenzo/AAA-5014-2019	BERTINI, Adele/0000-0002-9332-6725; Mazza, Paul/0000-0002-7664-3307; Rook, Lorenzo/0000-0001-8923-5428				44	27	32						0895-9811					JAN	1997	10	1	29	38		10.1016/S0895-9811(97)00003-5
J	Ficcarelli, G; Coltorti, M; Moreno-Espinosa, M; Pieruccini, PL; Rook, L; Torre, D	Ficcarelli, G; Coltorti, M; Moreno-Espinosa, M; Pieruccini, PL; Rook, L; Torre, D							A model for the Holocene extinction of the mammal megafauna in Ecuador	Journal of South American Earth Sciences		Article	mammal; megafauna; extinctions; latest Pleistocene; earliest Holocene; South America		This paper presents the results of multidisciplinary research in the Ecuadorian coastal regions, with particular emphasis on the Santa Elena Peninsula. The new evidence, together with previous data gathered on the Ecuadorian cordillera during the last 12 years, allows us to formulate a model that accounts for most of the mammal megafauna extinction at the Pleistocene/Holocene transition. After th…					Rook, Lorenzo/AAA-5014-2019; Pieruccini, Pierluigi/ABT-8376-2022	PIERUCCINI, PIERLUIGI/0000-0002-8994-2867; Rook, Lorenzo/0000-0001-8923-5428				46								0895-9811					MAR	2003	15	8	835	845	PII S0895-9811(02)00145-1	10.1016/S0895-9811(02)00145-1
J	Fiedel, SJ	Fiedel, Stuart J.							The spore conundrum: Does a dung fungus decline signal humans' arrival in the Eastern United States?	Quaternary International	English	Article		Late Pleistocene human; AMS radiocarbon-dates; Great Lakes Region; New York State; North-America; megafaunal extinction; pre-Clovis; chronology; mastodon; Sporormiella	Sporormiella is a fungus that grows on animal dung as part of its life cycle. A decline of Sporormiella reproductive spores in stratified Late Glacial pond sediments in Ohio, northern Indiana, and New York has been interpreted as a signal of regional extinction of megafauna due to human predation between 14,800 and 13,900 cal BP. However, this interpretation is undermined by two salient evidentia…			Fiedel, SJ (corresponding author), 11 Indian Pipe Lane, Amherst, MA 01002 USA.	sfiedel@louisberger.com						83	11	14	0	5	PERGAMON-ELSEVIER SCIENCE LTD	OXFORD	THE BOULEVARD, LANGFORD LANE, KIDLINGTON, OXFORD OX5 1GB, ENGLAND	1040-6182	1873-4553		QUATERN INT	Quat. Int.	2018-02-01	2018	466		247	255		10.1016/j.quaint.2015.11.130	http://dx.doi.org/10.1016/j.quaint.2015.11.130			9
J	Fiedel, SJ	Fiedel, Stuart J.							INITIAL HUMAN COLONIZATION OF THE AMERICAS, REDUX	Radiocarbon	English	Article	Americas; colonization; Paleoindian chronology	Western stemmed tradition; Pleistocene human occupation; Younger Dryas boundary; Coopers Ferry site; Upper Paleolithic occupation; elephant butchery site; Laacher See eruption; ice-free corridor; North-America; pre-Clovis	The study of the peopling of the Americas has been transformed in the past decade by astonishing progress in paleogenomic research. Ancient genomes now show that Native American ancestors were formed in Siberia or the Amur region by admixture of ca. 15-30% Ancient North Eurasian genes with those of East Asians. The Anzick infant, buried with Clovis bifaces at 12,900 cal BP, belonged to a group th…	[Fiedel, Stuart J.] 11 Indian Pipe Lane, Amherst, MA 01002 USA		Fiedel, SJ (corresponding author), 11 Indian Pipe Lane, Amherst, MA 01002 USA.	stuart.fiedel@wsp.com						434	10	10	9	47	CAMBRIDGE UNIV PRESS	NEW YORK	32 AVENUE OF THE AMERICAS, NEW YORK, NY 10013-2473 USA	0033-8222	1945-5755		RADIOCARBON	Radiocarbon	AUG	2022	64	4	845	897	PII S003382222100103X	10.1017/RDC.2021.103	http://dx.doi.org/10.1017/RDC.2021.103		2022-01-01	53
J	Field, J; Fillios, M; Wroe, S	Field, Judith; Fillios, Melanie; Wroe, Stephen							Chronological overlap between humans and megafauna in Sahul (Pleistocene Australia-New Guinea): A review of the evidence	Earth-Science Reviews	English	Review	Sahul; Australia; megafauna; extinctions; archaeology; climate change	New South Wales; Late Quaternary; human occupation; climate change; Cuddie-Springs; rock shelter; arid zone; extinctions; vegetation; ka	Over 60 faunal species disappeared from the Australian continent during the Middle-Late Pleistocene. Most of these animals were large to gigantic marsupials, birds and reptiles. A terminal extinction date of 46.4 kyr has been proposed for the megafauna, with all sites containing younger fossil megafauna dismissed by some researchers because of questions over stratigraphic integrity or chronologie…	[Field, Judith; Fillios, Melanie] Univ Sydney, Australian Key Ctr Microscopy & Microanal F09, Sydney, NSW 2006, Australia; [Field, Judith] Univ Sydney, Sch Philosoph & Hist Inquiry, Sydney, NSW 2006, Australia; [Wroe, Stephen] Univ New S Wales, Kensington, NSW 2052, Australia	University of Sydney; University of Sydney; University of New South Wales Sydney	Field, J (corresponding author), Univ Sydney, Australian Key Ctr Microscopy & Microanal F09, Sydney, NSW 2006, Australia.	j.field@usyd.edu.au	Wroe, Stephen/A-4462-2010; Field, Judith/C-7677-2011; Fillios, Melanie/D-7473-2018	Fillios, Melanie/0000-0002-7889-0061; Wroe, Stephen/0000-0002-6365-5915; Field, Judith/0000-0001-6807-1858	Australian Research Council; University of Sydney; Australian Museum; Brewarrina Local Aboriginal Land Council	Australian Research Council(Australian Research Council); University of Sydney(University of Sydney); Australian Museum; Brewarrina Local Aboriginal Land Council	The research is supported by an Australian Research Council Discovery Project grant, the University of Sydney and the Australian Museum. We are grateful to Jim Allen.Jacqui Duncan, Josephine Flood, Richard Fullagar, Lyndall Dawson, Joe Dortch, Mary-Jane Mountain and Jim O'Connell for comments on the manuscript. Thanks also to Gavin Prideaux for discussions and sharing of information. As ever, JF …	138	63	65	5	84	ELSEVIER SCIENCE BV	AMSTERDAM	PO BOX 211, 1000 AE AMSTERDAM, NETHERLANDS	0012-8252	1872-6828		EARTH-SCI REV	Earth-Sci. Rev.	AUG	2008	89	2025-04-03	97	115		10.1016/j.earscirev.2008.04.006	http://dx.doi.org/10.1016/j.earscirev.2008.04.006			19
J	Field, J; Fullagar, R; Lord, G	Field, J; Fullagar, R; Lord, G							A large area archaeological excavation at Cuddie Springs	Antiquity	English	Article	megafauna; Cuddie Springs; stone artefacts; environmental change	Pleistocene extinction; megafauna; Australia	Large area excavation at Cuddie Springs has revealed that the Pleistocene sediments have remained undisturbed. This eliminates the possibility that stone artefacts found in association with megafauna may have been introduced by disturbance from higher levels and indicates an overlap of megafauna with humans of at least 10,000 years.	Univ Sydney, Sydney, NSW 2006, Australia; Univ Wollongong, Wollongong, NSW 2522, Australia; Brewarrina Local Aboriginal Land Council, Brewarrina, NSW, Australia	University of Sydney; University of Wollongong	Univ Sydney, Sydney, NSW 2006, Australia.		Field, Judith/C-7677-2011; Fullagar, Richard/AAT-1155-2020	Field, Judith/0000-0001-6807-1858; Fullagar, Richard/0000-0003-1047-1466				29	21	21	1	10	CAMBRIDGE UNIV PRESS	CAMBRIDGE	EDINBURGH BLDG, SHAFTESBURY RD, CB2 8RU CAMBRIDGE, ENGLAND	0003-598X	1745-1744		ANTIQUITY	Antiquity	DEC	2001	75	290	696	702		10.1017/S0003598X00089195	http://dx.doi.org/10.1017/S0003598X00089195			7
J	Field, J; Wroe, S; Trueman, CN; Garvey, J; Wyatt-Spratt, S	Field, Judith; Wroe, Stephen; Trueman, Clive N.; Garvey, Jillian; Wyatt-Spratt, Simon							Looking for the archaeological signature in Australian Megafaunal extinctions	Quaternary International	English	Article		south-central Australia; early human occupation; Late Pleistocene; New Guinea; southwestern Australia; Late Quaternary; Cuddie Springs; climate-change; human arrival; land-use	The decline and disappearance of a range of giant marsupials, reptiles and birds from the Australian landscape during the last Glacial cycle continues to capture the imagination of both researchers and the general public. The events hinted at in the Australian fossil sequences appear to be mirrored on other continents through similar time periods, though the exact cause or sequence of extinctions…	[Field, Judith; Wroe, Stephen] Univ New S Wales, Sch Biol Earth & Environm Sci, Kensington, NSW 2052, Australia; [Trueman, Clive N.] Univ Southampton, Natl Oceanog Ctr, Southampton SO14 3ZH, Hants, England; [Garvey, Jillian] La Trobe Univ, Archaeol Program, Bundoora, Vic 3086, Australia	University of New South Wales Sydney; University of Southampton; NERC National Oceanography Centre; La Trobe University	Field, J (corresponding author), Univ New S Wales, Sch Biol Earth & Environm Sci, Kensington, NSW 2052, Australia.	judith.field@unsw.edu.au	Trueman, Clive/E-6925-2011; Field, Judith/C-7677-2011; Wroe, Stephen/A-4462-2010	Field, Judith/0000-0001-6807-1858; Wyatt-Spratt, Simon/0000-0002-5976-3614; Trueman, Clive N./0000-0002-4995-736X; Wroe, Stephen/0000-0002-6365-5915	Australian Research Council QEII Fellowship; ARC Discovery Project Grant [DP0557923]; University of Sydney; Australian Research Council [DP0557923] Funding Source: Australian Research Council	Australian Research Council QEII Fellowship(Australian Research Council); ARC Discovery Project Grant(Australian Research Council); University of Sydney(University of Sydney); Australian Research Council(Australian Research Council)	We are indebted to Jim Allen, Iain Davidson, David Horton and Richard Fullagar (and an anonymous referee) for comments on this manuscript and ongoing discussions. SW is the recipient of an Australian Research Council QEII Fellowship. Work at Cuddie Springs (including aspects of the ESR study) was funded by an ARC Discovery Project Grant (DP0557923), and the University of Sydney.	102	26	27	0	104	PERGAMON-ELSEVIER SCIENCE LTD	OXFORD	THE BOULEVARD, LANGFORD LANE, KIDLINGTON, OXFORD OX5 1GB, ENGLAND	1040-6182	1873-4553		QUATERN INT	Quat. Int.	2003-02-01	2013	285		76	88		10.1016/j.quaint.2011.04.013	http://dx.doi.org/10.1016/j.quaint.2011.04.013			13
J	Field, J.H.	Field, Judith							Trampling through the pleistocene: Does taphonomy matter at cuddie springs?	Australian Archaeology		Article			After 15 years of continuing investigation, analysis and publication of the sedimentary sequence at Cuddie Springs, the site and its contents continue to draw considerable attention from those investigating the timing and cause of the extinction of the megafauna. The archaeological record commences at Cuddie Springs around 36ka and overlaps with a record of a handful of megafauna species for up t…										17														2006	63		9	20		10.1080/03122417.2006.11681834				11
J	Fillios, M; Field, J; Charles, B	Fillios, Melanie; Field, Judith; Charles, Bethan							Investigating human and megafauna co-occurrence in Australian prehistory: Mode and causality in fossil accumulations at Cuddie Springs	Quaternary International	English	Review		Genyornis newtoni; Late Quaternary; bone-density; Grotte XVI; extinction; record; site; bioturbation; assemblages; transport	Human arrival in Sahul - Pleistocene Australia and New Guinea - has long been argued as the catalyst in the decline and disappearance of a suite of extinct animals referred to as megafauna. The debate concerning causality in Sahul is highly polarised, with climate change often cited as the alternative explanatory model. On continental Australia, there are few datasets available with which to expl…	[Fillios, Melanie; Field, Judith] Univ Sydney, Australian Key Ctr Microscopy & Microanal, Electron Microscope Unit F09, Sydney, NSW 2006, Australia; [Field, Judith] Univ Sydney, Sch Philosoph & Hist Inquiry, Sydney, NSW 2006, Australia; [Charles, Bethan] Univ Sydney, Dept Archaeol, Sydney, NSW 2006, Australia	University of Sydney; University of Sydney; University of Sydney	Field, J (corresponding author), Univ Sydney, Australian Key Ctr Microscopy & Microanal, Electron Microscope Unit F09, Sydney, NSW 2006, Australia.	m.fillios@usyd.edu.au; j.field@usyd.edu.au; bethan.charles@hotmail.com	Field, Judith/C-7677-2011; Fillios, Melanie/D-7473-2018	Fillios, Melanie/0000-0002-7889-0061; Field, Judith/0000-0001-6807-1858	Brewarrina Local Aboriginal Land Council; Ngemba Community Working Party; Johnstone, Currey and Green families; Walgett Shire Council; Australian Research Council; University of Sydney	Brewarrina Local Aboriginal Land Council; Ngemba Community Working Party; Johnstone, Currey and Green families; Walgett Shire Council; Australian Research Council(Australian Research Council); University of Sydney(University of Sydney)	We are indebted to the continuing support of the Brewarrina Local Aboriginal Land Council and the Ngemba Community Working Party. The field work could not have proceeded without the generous support and assistance of the Johnstone, Currey and Green families, the Walgett Shire Council and the many volunteers and colleagues involved in the work. Garry Lord, Brett Cochrane, Tom Cochrane, Chris Boney…	101	28	28	0	41	PERGAMON-ELSEVIER SCIENCE LTD	OXFORD	THE BOULEVARD, LANGFORD LANE, KIDLINGTON, OXFORD OX5 1GB, ENGLAND	1040-6182	1873-4553		QUATERN INT	Quat. Int.	2001-01-01	2010	211	2025-02-01	123	143		10.1016/j.quaint.2009.04.003	http://dx.doi.org/10.1016/j.quaint.2009.04.003			21
J	Firestone, RB; West, A; Kennett, JP; Becker, L; Bunch, TE; Revay, ZS; Schultz, PH; Belgya, T; Kennett, DJ; Erlandson, JM; Dickenson, OJ; Goodyear, AC; Harris, RS; Howard, GA; Kloosterman, JB; Lechler, P; Mayewski, PA; Montgomery, J; Poreda, R; Darrah, T; Hee, SSQ; Smitha, AR; Stich, A; Topping, W; Wittke, JH; Wolbach, WS	Firestone, R. B.; West, A.; Kennett, J. P.; Becker, L.; Bunch, T. E.; Revay, Z. S.; Schultz, P. H.; Belgya, T.; Kennett, D. J.; Erlandson, J. M.; Dickenson, O. J.; Goodyear, A. C.; Harris, R. S.; Howard, G. A.; Kloosterman, J. B.; Lechler, P.; Mayewski, P. A.; Montgomery, J.; Poreda, R.; Darrah, T.; Hee, S. S. Que; Smitha, A. R.; Stich, A.; Topping, W.; Wittke, J. H.; Wolbach, W. S.							Evidence for an extraterrestrial impact 12,900 years ago that contributed to the megafaunal extinctions and the Younger Dryas cooling	Proceedings of the National Academy of Sciences of the United States of America	English	Article	comet; iridium; micrometeorites; nanodiamonds; spheruies	Cretaceous-Tertiary boundary; folsom; Greenland; wildfires; Carolina; overkill; iridium; context; Clovis; carbon	A carbon-rich black layer, dating to approximate to 12.9 ka, has been previously identified at approximate to 50 Clovis-age sites across North America and appears contemporaneous with the abrupt onset of Younger Dryas (YD) cooling. The in situ bones of extinct Pleistocene megafauna, along with Clovis tool assemblages, occur below this black layer but not within or above it. Causes for the extinct…	Lawrence Berkeley Natl Lab, Berkeley, CA 94720 USA; Geosci Consulting, Dewey, AZ 86327 USA; Univ Calif Santa Barbara, Dept Earth Sci, Santa Barbara, CA 93106 USA; Univ Calif Santa Barbara, Inst Crustal Studies, Santa Barbara, CA 93106 USA; No Arizona Univ, Flagstaff, AZ 86011 USA; Inst Isotopes & Surface Chem, H-1525 Budapest, Hungary; Brown Univ, Dept Geol Sci, Providence, RI 02912 USA; Univ Ore…	United States Department of Energy (DOE); Lawrence Berkeley National Laboratory; University of California System; University of California Santa Barbara; University of California System; University of California Santa Barbara; Northern Arizona University; Brown University; University of Oregon; University of Oregon; Eastern New Mexico University; Nevada System of Higher Education (NSHE); Universi…	Firestone, RB (corresponding author), Lawrence Berkeley Natl Lab, Berkeley, CA 94720 USA.	rbfirestone@lbl.gov	Erlandson, Jon/ITV-0032-2023; Mayewski, Paul/HRD-6969-2023; Belgya, Tamás/GYU-5859-2022; Kennett, Douglas/I-7613-2015; Darrah, Tom/I-2253-2016; Belgya, Tamas/K-5356-2012	Firestone, Richard/0000-0003-3833-5546; Erlandson, Jon/0000-0002-4705-4319; West, Allen/0000-0003-3576-4847; Belgya, Tamas/0000-0003-4281-5470				57	404	476	54	531	NATL ACAD SCIENCES	WASHINGTON	2101 CONSTITUTION AVE NW, WASHINGTON, DC 20418 USA	0027-8424			P NATL ACAD SCI USA	Proc. Natl. Acad. Sci. U. S. A.	2009-10-01	2007	104	41	16016	16021		10.1073/pnas.0706977104	http://dx.doi.org/10.1073/pnas.0706977104			6
J	Flores, JC	Flores, J. C.							Modelling Late Pleistocene megafaunal extinction and critical cases: A simple prey-predator perspective	Ecological Modelling	English	Article	population dynamics; coupled nonlinear; prey-predator; megafauna extinction	population growth rate; modern humans; human colonization; radiocarbon dates; North America; body size; hypothesis; overkill; fire; Neanderthals	Using a nonlinear prey-predator model, we establish the extinction threshold for megafauna in the Late Pleistocene and predict extinction times since the arrival of hunters. The threshold is related to growth and depredation rates. From archaeological data, ecological findings, and the overkill hypothesis, the elapsed extinction times in Australia and North America are roughly estimated as 4800 a…	Univ Tarapaca, Inst Alta Invest IAI, Arica, Chile	Universidad de Tarapaca	Flores, JC (corresponding author), Univ Tarapaca, Inst Alta Invest IAI, Casilla 7-D, Arica, Chile.	cflores@uta.cl		Flores, J. C./0000-0002-5717-5317	FONDECYT [1120344]	FONDECYT(Comision Nacional de Investigacion Cientifica y Tecnologica (CONICYT)CONICYT FONDECYT)	This work was supported by FONDECYT 1120344. Valuable discussions were carried-out with H. Cortes (ULS), M. Bologna (UTA) and K. Chandia (UTA).	54	8	8	2	130	ELSEVIER SCIENCE BV	AMSTERDAM	PO BOX 211, 1000 AE AMSTERDAM, NETHERLANDS	0304-3800	1872-7026		ECOL MODEL	Ecol. Model.	2010-11-01	2014	291		218	223		10.1016/j.ecolmodel.2014.08.004	http://dx.doi.org/10.1016/j.ecolmodel.2014.08.004			6
J	Fordham, DA; Brown, SC; Akçakaya, HR; Brook, BW; Haythorne, S; Manica, A; Shoemaker, KT; Austin, JJ; Blonder, B; Pilowsky, J; Rahbek, C; Nogues-Bravo, D	Fordham, Damien A.; Brown, Stuart C.; Akcakaya, H. Resit; Brook, Barry W.; Haythorne, Sean; Manica, Andrea; Shoemaker, Kevin T.; Austin, Jeremy J.; Blonder, Benjamin; Pilowsky, Julia; Rahbek, Carsten; Nogues-Bravo, David							Process-explicit models reveal pathway to extinction for woolly mammoth using pattern-oriented validation	Ecology Letters	English	Article	climate change; ecological process; extinction dynamics; mechanistic model; megafauna; metapopulation; Pleistocene-Holocene transition; population model; range dynamics; synergistic threats	environmental stochasticity; population dynamics; climate change; Pleistocene; conservation; sensitivity; genetics; maximum; risk; size	Pathways to extinction start long before the death of the last individual. However, causes of early stage population declines and the susceptibility of small residual populations to extirpation are typically studied in isolation. Using validated process-explicit models, we disentangle the ecological mechanisms and threats that were integral in the initial decline and later extinction of the wooll…	[Fordham, Damien A.; Brown, Stuart C.; Haythorne, Sean; Austin, Jeremy J.; Pilowsky, Julia] Univ Adelaide, Environm Inst, Adelaide, SA, Australia; [Fordham, Damien A.; Brown, Stuart C.; Haythorne, Sean; Austin, Jeremy J.; Pilowsky, Julia] Univ Adelaide, Sch Biol Sci, Adelaide, SA, Australia; [Fordham, Damien A.; Pilowsky, Julia; Rahbek, Carsten; Nogues-Bravo, David] Univ Copenhagen, Ctr Macroecol…	University of Adelaide; University of Adelaide; University of Copenhagen; State University of New York (SUNY) System; Stony Brook University; University of Tasmania; University of Tasmania; University of Cambridge; Nevada System of Higher Education (NSHE); University of Nevada Reno; University of California System; University of California Berkeley; Imperial College London; University of Southern…	Fordham, DA (corresponding author), Univ Adelaide, Adelaide, SA 5005, Australia.	damien.fordham@adelaide.edu.au	Rahbek, Carsten/GVQ-0752-2022; Brown, Stuart/AAC-7472-2020; Pilowsky, July/IWU-9781-2023; Shoemaker, Kevin/IZD-8166-2023; Manica, Andrea/N-9013-2019; Austin, Jeremy/F-8729-2010; Brook, Barry/G-2686-2011; Manica, Andrea/B-5497-2008; Rahbek, Carsten/L-1129-2013; Fordham, Damien/E-9255-2013	Austin, Jeremy/0000-0003-4244-2942; Brook, Barry/0000-0002-2491-1517; Nogues-Bravo, David/0000-0002-4060-0153; Manica, Andrea/0000-0003-1895-450X; Shoemaker, Kevin/0000-0002-3789-3856; Pilowsky, July/0000-0002-6376-2585; Brown, Stuart/0000-0002-0669-1418; Rahbek, Carsten/0000-0003-4585-0300; Fordham, Damien/0000-0003-2137-5592	Australian Research Council [DP180102392, FT140101192]; Danish Research Foundation [DNRF96]; Australian Research Council [FT140101192] Funding Source: Australian Research Council	Australian Research Council(Australian Research Council); Danish Research Foundation; Australian Research Council(Australian Research Council)	Australian Research Council, Grant/Award Number: DP180102392 and FT140101192; Danish Research Foundation, Grant/Award Number: DNRF96	59	24	26	3	29	WILEY	HOBOKEN	111 RIVER ST, HOBOKEN 07030-5774, NJ USA	1461-023X	1461-0248		ECOL LETT	Ecol. Lett.	JAN	2022	25	1	125	137		10.1111/ele.13911	http://dx.doi.org/10.1111/ele.13911		2021-11-01	13
J	Fordham, DA; Brown, SC; Canteri, E; Austin, JJ; Lomolino, M; Haythorne, S; Armstrong, E; Bocherens, H; Manica, A; Rey-Iglesia, A; Rahbek, C; Nogués-Bravo, D; Lorenzen, ED	Fordham, Damien A.; Brown, Stuart C.; Canteri, Elisabetta; Austin, Jeremy J.; Lomolino, Mark, V; Haythorne, Sean; Armstrong, Edward; Bocherens, Herve; Manica, Andrea; Rey-Iglesia, Alba; Rahbek, Carsten; Nogues-Bravo, David; Lorenzen, Eline D.							52,000 years of woolly rhinoceros population dynamics reveal extinction mechanisms	Proceedings of the National Academy of Sciences of the United States of America	English	Article	megafauna; metapopulation dynamics; ecological mechanisms; synergistic interactions; reconstructing extinctions	climate change; body size; ice core; Pleistocene; megafauna; vegetation; history; events; models	The extinction of the woolly rhinoceros ( Coelodonta antiquitatis ) at the onset of the Holocene remains an enigma, with conflicting evidence regarding its cause and spatiotemporal dynamics. This partly reflects challenges in determining demographic responses of late Quaternary megafauna to climatic and anthropogenic causal drivers with available genetic and paleontological techniques. Here, we s…	[Fordham, Damien A.; Brown, Stuart C.; Canteri, Elisabetta; Austin, Jeremy J.; Haythorne, Sean] Univ Adelaide, Environm Inst, Sch Biol Sci, Adelaide, SA 5005, Australia; [Fordham, Damien A.; Canteri, Elisabetta; Rahbek, Carsten; Nogues-Bravo, David] Univ Copenhagen, Globe Inst, Ctr Macroecol Evolut & Climate, DK-2100 Copenhagen, Denmark; [Fordham, Damien A.; Rahbek, Carsten] Univ Copenhagen, Glob…	University of Adelaide; University of Copenhagen; University of Copenhagen; University of Copenhagen; State University of New York (SUNY) System; State University of New York (SUNY) College of Environmental Science & Forestry; University of Melbourne; University of Helsinki; Leibniz Association; Senckenberg Gesellschaft fur Naturforschung (SGN); Eberhard Karls University of Tubingen; University o…	Fordham, DA (corresponding author), Univ Adelaide, Environm Inst, Sch Biol Sci, Adelaide, SA 5005, Australia.;Fordham, DA (corresponding author), Univ Copenhagen, Globe Inst, Ctr Macroecol Evolut & Climate, DK-2100 Copenhagen, Denmark.;Fordham, DA (corresponding author), Univ Copenhagen, Globe Inst, Ctr Global Mt Biodivers, DK-2100 Copenhagen, Denmark.	damien.formdham@adelaide.edu.au	Lorenzen, Eline/D-1442-2012; Rahbek, Carsten/GVQ-0752-2022; Manica, Andrea/N-9013-2019; Austin, Jeremy/F-8729-2010; Rahbek, Carsten/L-1129-2013; Manica, Andrea/B-5497-2008; BOCHERENS, Herve/F-3580-2011; Fordham, Damien/E-9255-2013	Rahbek, Carsten/0000-0003-4585-0300; Lomolino, Mark/0000-0001-6937-4762; Manica, Andrea/0000-0003-1895-450X; Canteri, Elisabetta/0000-0001-9867-8247; BOCHERENS, Herve/0000-0002-0494-0126; Fordham, Damien/0000-0003-2137-5592; Armstrong, Edward/0000-0001-9561-0159	Australian Research Council [DP180102392]; Phoenix HPC service at the University	Australian Research Council(Australian Research Council); Phoenix HPC service at the University	ACKNOWLEDGMENTS. This work was funded by the Australian Research Council (DP180102392) . Computing was supported by the Phoenix HPC service at the University ofAdelaide.J.A. Pilowsky assisted with the collation and interrogation of fossil records.	56	3	3	38	43	NATL ACAD SCIENCES	WASHINGTON	2101 CONSTITUTION AVE NW, WASHINGTON, DC 20418 USA	0027-8424	1091-6490		P NATL ACAD SCI USA	Proc. Natl. Acad. Sci. U. S. A.	2011-06-01	2024	121	24			e2316419121	10.1073/pnas.2316419121	http://dx.doi.org/10.1073/pnas.2316419121			9
J	Fuller, BT; Southon, JR; Fahrni, SM; Farrell, AB; Takeuchi, GT; Nehlich, O; Guiry, EJ; Richards, MP; Lindsey, EL; Harris, JM	Fuller, Benjamin T.; Southon, John R.; Fahrni, Simon M.; Farrell, Aisling B.; Takeuchi, Gary T.; Nehlich, Olaf; Guiry, Eric J.; Richards, Michael P.; Lindsey, Emily L.; Harris, John M.							Pleistocene paleoecology and feeding behavior of terrestrial vertebrates recorded in a pre-LGM asphaltic deposit at Rancho La Brea, California	Palaeogeography Palaeoclimatology Palaeoecology	English	Article	stable isotopes; radiocarbon dating; megafauna; climate change; extinction	stable isotopes; bone collagen; tar pits; southern Caroline; carbon; nitrogen; ecology; megafauna; insights; reveal	Sixteen taxa comprising extinct megafauna and extant species from a single asphalt deposit (Project 23, Deposit 1) at Rancho La Brea were isotopically analyzed (delta C-13, delta N-15, delta S-34) and C-14 dated to investigate paleoecology and feeding behavior of terrestrial vertebrates in southern California during the late Pleistocene. The large majority of the C-14 dates cluster between simila…	[Fuller, Benjamin T.; Southon, John R.; Fahrni, Simon M.] Univ Calif Irvine, Dept Earth Syst Sci, Keck CCAMS Grp, B321 Croul Hall, Irvine, CA 92697 USA; [Fuller, Benjamin T.; Farrell, Aisling B.; Takeuchi, Gary T.; Lindsey, Emily L.; Harris, John M.] La Brea Tar Pits & Museum, 5801 Wilshire Blvd, Los Angeles, CA 90036 USA; [Fuller, Benjamin T.] Aarhus Univ, Sch Culture & Soc, Dept Archaeol & Heri…	University of California System; University of California Irvine; Aarhus University; University of British Columbia; Simon Fraser University	Fuller, BT (corresponding author), Univ Calif Irvine, Dept Earth Syst Sci, Keck CCAMS Grp, B321 Croul Hall, Irvine, CA 92697 USA.	fuller@cas.au.dk	Richards, Michael/O-3717-2016; Richards, Michael/A-9374-2008; Nehlich, Olaf/A-3767-2010	Lindsey, Emily/0000-0003-0845-8545; Richards, Michael/0000-0001-5274-8887; Nehlich, Olaf/0000-0002-4993-5013	DEDiT (Danish and European Diets in Time) start-up project - Aarhus University Research Foundation (Aarhus Universitets Forskningsfond) [21276]	DEDiT (Danish and European Diets in Time) start-up project - Aarhus University Research Foundation (Aarhus Universitets Forskningsfond)	Chanda Bertrand, Hector Martinez and Shari Bush are thanked for assistance with collagen preparation. Bryn Letham is thanked for creating the map in Fig. 1. BTF acknowledges the support of Marcello Mannino and the DEDiT (Danish and European Diets in Time) start-up project (n. 21276) funded by the Aarhus University Research Foundation (Aarhus Universitets Forskningsfond). Declarations of interest:…	54	11	12	1	18	ELSEVIER	AMSTERDAM	RADARWEG 29, 1043 NX AMSTERDAM, NETHERLANDS	0031-0182	1872-616X		PALAEOGEOGR PALAEOCL	Paleogeogr. Paleoclimatol. Paleoecol.	2001-01-01	2020	537				109383	10.1016/j.palaeo.2019.109383	http://dx.doi.org/10.1016/j.palaeo.2019.109383			8
J	Fusco, DA; Arnold, LJ; Gully, GA; Levchenko, VA; Jacobsen, GE; Prideaux, GJ	Fusco, Diana A.; Arnold, Lee J.; Gully, Grant A.; Levchenko, Vladimir A.; Jacobsen, Geraldine E.; Prideaux, Gavin J.							Revisiting the late Quaternary fossiliferous infills of Cathedral Cave, Wellington Caves (central eastern New South Wales, Australia)	Journal of Quaternary Science	English	Article	cave sediments; geochronology; palaeontology; Quaternary; Wellington Caves	perenially frozen deposits; Late Pleistocene; multiple grains; radiocarbon chronologies; OSL characteristics; dose distributions; northern Australia; human occupation; single; luminescence	The Wellington Caves were the first Australian locality from which Europeans collected and analysed vertebrate fossils. Within this system, Cathedral Cave contains Australia's stratigraphically deepest sequence of fossil-bearing infill sediments, the age and depositional history of which has been poorly understood. Here we present results from a new excavation of the upper 4.2 m of the deposit, r…	[Fusco, Diana A.; Gully, Grant A.; Prideaux, Gavin J.] Flinders Univ S Australia, Coll Sci & Engn, Bedford Pk, SA 5042, Australia; [Arnold, Lee J.] Univ Adelaide, Environm Inst, Sch Phys Sci, North Terrace Campus, Adelaide, SA 5005, Australia; [Arnold, Lee J.] Univ Adelaide, Inst Photon & Adv Sensing IPAS, North Terrace Campus, Adelaide, SA 5005, Australia; [Levchenko, Vladimir A.; Jacobsen, Gera…	Flinders University South Australia; University of Adelaide; University of Adelaide; Australian Nuclear Science & Technology Organisation	Fusco, DA (corresponding author), Flinders Univ S Australia, Coll Sci & Engn, Bedford Pk, SA 5042, Australia.	diana.fusco@flinders.edu.au	Fusco, Diana/O-6960-2019; Arnold, Lee/J-4356-2018	Fusco, Diana/0000-0002-3893-7304; Arnold, Lee/0000-0001-9603-3824	Australian Research Council (ARC) [DP150100264]; Maxim Foundation; Royal Society of South Australia; ARC [FT130100195]; Australian Institute of Nuclear Science and Engineering grant [ALNGRA14514]; Australian Government Research Training Program Scholarship; Flinders University Research Scholarship; ANSTO Research grant [AP10991]	Australian Research Council (ARC)(Australian Research Council); Maxim Foundation; Royal Society of South Australia; ARC(Australian Research Council); Australian Institute of Nuclear Science and Engineering grant; Australian Government Research Training Program Scholarship(Australian GovernmentDepartment of Industry, Innovation and Science); Flinders University Research Scholarship; ANSTO Research…	The research presented here was undertaken at the Wellington Caves and Flinders University on unceded traditional lands of the Wiradjuri and Kaurna people. We pay respect to the Elders past, present and emerging. We thank the staff and management of the Wellington Caves for their support and interest in this research and the numerous volunteers who assisted with excavations. We also thank Henri G…	109	4	4	1	5	WILEY	HOBOKEN	111 RIVER ST, HOBOKEN 07030-5774, NJ USA	0267-8179	1099-1417		J QUATERNARY SCI	J. Quat. Sci.	MAY	2023	38	4	505	525		10.1002/jqs.3497	http://dx.doi.org/10.1002/jqs.3497		2023-01-01	21
J	Galetti, M; Moleón, M; Jordano, P; Pires, MM; Guimaraes, PR; Pape, T; Nichols, E; Hansen, D; Olesen, JM; Munk, M; de Mattos, JS; Schweiger, AH; Owen-Smith, N; Johnson, CN; Marquis, RJ; Svenning, JC	Galetti, Mauro; Moleon, Marcos; Jordano, Pedro; Pires, Mathias M.; Guimaraes, Paulo R., Jr.; Pape, Thomas; Nichols, Elizabeth; Hansen, Dennis; Olesen, Jens M.; Munk, Michael; de Mattos, Jacqueline S.; Schweiger, Andreas H.; Owen-Smith, Norman; Johnson, Christopher N.; Marquis, Robert J.; Svenning, Jens-Christian							Ecological and evolutionary legacy of megafauna extinctions	Biological Reviews	English	Review	anachronism; cerrado; botfly; seed dispersal; parasite-host interaction; dung beetles; plant defence; scavengers; megaherbivores; savanna	African dung beetle; seed-dispersal; Coleoptera Scarabeidae; vampire bats; body-size; Pleistocene megafauna; Loxodonta africana; feeding behavior; large herbivores; spotted hyena	For hundreds of millions of years, large vertebrates (megafauna) have inhabited most of the ecosystems on our planet. During the late Quaternary, notably during the Late Pleistocene and the early Holocene, Earth experienced a rapid extinction of large, terrestrial vertebrates. While much attention has been paid to understanding the causes of this massive megafauna extinction, less attention has b…	[Galetti, Mauro; de Mattos, Jacqueline S.] Univ Estadual Paulista, Inst Biociencias, Dept Ecol, UNESP, BR-13506900 Rio Claro, SP, Brazil; [Moleon, Marcos; Jordano, Pedro] CSIC, Estn Biol Donana, EBD SCIC, Seville, Spain; [Moleon, Marcos] Univ Granada, Dept Zool, Granada, Spain; [Pires, Mathias M.; Guimaraes, Paulo R., Jr.] Univ Sao Paulo, Dept Ecol, Sao Paulo, SP, Brazil; [Pape, Thomas] Univ Cope…	Universidade Estadual Paulista; Consejo Superior de Investigaciones Cientificas (CSIC); CSIC - Estacion Biologica de Donana (EBD); University of Granada; Universidade de Sao Paulo; University of Copenhagen; Swarthmore College; University of Zurich; Aarhus University; University of Witwatersrand; University of Tasmania; University of Tasmania; University of Missouri System; University of Missouri …	Galetti, M (corresponding author), Univ Estadual Paulista, Inst Biociencias, Dept Ecol, UNESP, BR-13506900 Rio Claro, SP, Brazil.;Galetti, M (corresponding author), Aarhus Univ, Sect Ecoinformat & Biodivers, Dept Biosci, DK-8000 Aarhus C, Denmark.	mgaletti@rc.unesp.br	Svenning, Jens-Christian/C-8977-2012; Nichols, Elizabeth/L-7484-2013; de Mattos, Jacqueline/AAY-5856-2020; Owen-Smith, Norman/ABI-5113-2020; Guimaraes, Paulo/E-1915-2016; Galetti, Mauro/M-8751-2013; Pape, Thomas/E-7520-2011; Olesen, Jens/A-3011-2009; Hansen, Dennis/A-3307-2008; Jordano, Pedro/A-5162-2008; Johnson, Chris/J-7894-2014; Moleon, Marcos/K-2875-2014; Mistretta Pires, Mathias/I-4489-2012…	Owen-Smith, Norman/0000-0001-8429-1201; Pape, Thomas/0000-0001-6609-0609; Munk, Michael/0000-0003-3281-9160; Olesen, Jens/0000-0003-1998-1083; Hansen, Dennis/0000-0002-9584-2766; Guimaraes Junior, Paulo Roberto/0000-0001-9161-8305; Jordano, Pedro/0000-0003-2142-9116; Galetti, Mauro/0000-0002-8187-8696; Johnson, Chris/0000-0002-9719-3771; Moleon, Marcos/0000-0002-3126-619X; Mistretta Pires, Mathia…	Aarhus University Research Foundation; VILLUM FONDEN [CF16-0005]; Severo Ochoa Program for Centres of Excellence in R+D+I [SEV-2012-0262]; Ramon y Cajal [RYC-2015-19231]; Conselho Nacional de Desenvolvimento Cientifico (CNPq) [300241/2010-0]; Sao Paulo Research Foundation (FAPESP) [2014/01986-0, 2013/22016-6]; Fundacao de Amparo a Pesquisa do Estado de Sao Paulo (FAPESP) [13/22016-6] Funding Sour…	Aarhus University Research Foundation; VILLUM FONDEN(Villum Fonden); Severo Ochoa Program for Centres of Excellence in R+D+I; Ramon y Cajal(Spanish Government); Conselho Nacional de Desenvolvimento Cientifico (CNPq)(Conselho Nacional de Desenvolvimento Cientifico e Tecnologico (CNPQ)); Sao Paulo Research Foundation (FAPESP)(Fundacao de Amparo a Pesquisa do Estado de Sao Paulo (FAPESP)); Fundacao …	M.G. and J-C.S. thank the Aarhus University Research Foundation for a guest researcher grant to sponsor M.G. at Aarhus University. J-C.S. considers this work a contribution to his Carlsberg Foundation Semper Ardens project MegaPast2Future (CF16-0005) and to his VILLUM Investigator project 'Biodiversity Dynamics in a Changing World' funded by VILLUM FONDEN. N. Garcia provided useful information on…	220	182	198	8	318	WILEY	HOBOKEN	111 RIVER ST, HOBOKEN 07030-5774, NJ USA	1464-7931	1469-185X		BIOL REV	Biol. Rev.	MAY	2018	93	2	845	862		10.1111/brv.12374	http://dx.doi.org/10.1111/brv.12374			18
J	Gallo, V; Avilla, LS; Pereira, RCL; Absolon, BA	Gallo, Valeria; Avilla, Leonardo S.; Pereira, Rodrigo C. L.; Absolon, Bruno A.							Distributional patterns of herbivore megamammals during the Late Pleistocene of South America	Anais da Academia Brasileira de Ciencas	English	Article	distributional patterns; historical biogeography; panbiogeography; megafauna; Late Pleistocene; South America	panbiogeographical analysis; Late Quaternary; generalized tracks; climate; biogeography; extinctions; croizat; forest; Brazil; areas	The geographic distribution of 27 species of the South American megafauna of herbivore mammals during the Late Pleistocene was analyzed in order to identify their distributional patterns. The distribution of the species was studied using the panbiogeographical method of track analysis. Six generalized tracks (GTs) and two biogeographic nodes were obtained. The GTs did not completely superpose wit…	[Gallo, Valeria; Pereira, Rodrigo C. L.; Absolon, Bruno A.] Univ Estado Rio de Janeiro, Inst Biol, Dept Zool, Lab Sistemat & Biogeog, BR-20550013 Rio De Janeiro, RJ, Brazil; [Avilla, Leonardo S.; Pereira, Rodrigo C. L.; Absolon, Bruno A.] Univ Fed Estado Rio de Janeiro, Inst Biociencias, Dept Zool, Lab Mastozool, BR-22290240 Rio De Janeiro, RJ, Brazil	Universidade do Estado do Rio de Janeiro; Universidade Federal do Estado do Rio de Janeiro	Gallo, V (corresponding author), Univ Estado Rio de Janeiro, Inst Biol, Dept Zool, Lab Sistemat & Biogeog, Rua Sao Francisco Xavier 524, BR-20550013 Rio De Janeiro, RJ, Brazil.	gallo@uerj.br	GALLO, VALÉRIA/B-3466-2013; Avilla, Leonardo/AAH-1112-2019	Avilla, LEONARDO/0000-0001-5547-5757; GALLO, VALERIA/0000-0003-1766-4084	Fundacao Carlos Chagas de Amparo a Pesquisa do Estado do Rio de Janeiro [FAPERJ E-26/111.104/2008, E-26/111.558/2008]; Conselho Nacional de Desenvolvimento Cientifico e Tecnologico (CNPq - Brazil); 'PROCIENCIA' (Rio de Janeiro State Government); Coordenacao de Aperfeicoamento de Pessoal de Nivel Superior-CAPES (Brazilian Federal Government); CNPq (Brazilian Federal Government)	Fundacao Carlos Chagas de Amparo a Pesquisa do Estado do Rio de Janeiro; Conselho Nacional de Desenvolvimento Cientifico e Tecnologico (CNPq - Brazil)(Conselho Nacional de Desenvolvimento Cientifico e Tecnologico (CNPQ)); 'PROCIENCIA' (Rio de Janeiro State Government); Coordenacao de Aperfeicoamento de Pessoal de Nivel Superior-CAPES (Brazilian Federal Government); CNPq (Brazilian Federal Governm…	This research was supported by grants from the Fundacao Carlos Chagas de Amparo a Pesquisa do Estado do Rio de Janeiro (FAPERJ E-26/111.104/2008 and E-26/111.558/2008). V.G. has research fellowship grants from the Conselho Nacional de Desenvolvimento Cientifico e Tecnologico (CNPq - Brazil) and from the 'PROCIENCIA' (Rio de Janeiro State Government). B.A.A. has fellowship from Coordenacao de Aper…	51	21	24	0	14	ACAD BRASILEIRA DE CIENCIAS	RIO JANEIRO	RUA ANFILOFIO DE CARVALHO, 29, 3 ANDAR, 20030-060 RIO JANEIRO, BRAZIL	0001-3765	1678-2690		AN ACAD BRAS CIENC	An. Acad. Bras. Cienc.	JUN	2013	85	2	533	546		10.1590/S0001-37652013000200005	http://dx.doi.org/10.1590/S0001-37652013000200005			14
J	Garvey, J; Cochrane, B; Field, J; Boney, C	Garvey, Jillian; Cochrane, Brett; Field, Judith; Boney, Chris							Modern emu (Dromaius novaehollandiae) butchery, economic utility and analogues for the Australian archaeological record	Environmental Archaeology	English	Article	Australia; Late Pleistocene; archaeology; Dromaius novaehollandiae; economic utility; fatty acid analysis; Genyornis newtoni	fatty acid composition; New Guinea; nutritional ecology; seasonal variation; Genyornis-newtoni; Late Pleistocene; bone marrow; meat; extinction; megafauna	Australia's largest flightless bird, the emu (Dromaius novaehollandiae), has been an important prey animal for Indigenous people for millennia, especially in arid/semi-arid areas where, along with large kangaroos, they can provide high economic returns from single kills. Understanding modern prey selection, butchering patterns and the relative nutritional value of the different body portions in t…	[Garvey, Jillian] La Trobe Univ, Archaeol Program, Bundoora, Vic 3086, Australia; [Field, Judith] Univ New S Wales, Sch Biol Earth & Environm Sci, Sydney, NSW 2052, Australia	La Trobe University; University of New South Wales Sydney	Garvey, J (corresponding author), La Trobe Univ, Archaeol Program, Bundoora, Vic 3086, Australia.	j.garvey@latrobe.edu.au	Field, Judith/C-7677-2011	Field, Judith/0000-0001-6807-1858				102	17	17	0	25	ROUTLEDGE JOURNALS, TAYLOR & FRANCIS LTD	ABINGDON	2-4 PARK SQUARE, MILTON PARK, ABINGDON OX14 4RN, OXON, ENGLAND	1461-4103	1749-6314		ENVIRON ARCHAEOL	Environ. Archaeol.	OCT	2011	16	2	97	112		10.1179/174963111X13110803260840	http://dx.doi.org/10.1179/174963111X13110803260840			16
J	Gill, JL	Gill, Jacquelyn L.							Ecological impacts of the late Quaternary megaherbivore extinctions	New Phytologist	English	Review	extinction; megafauna; palaeoecology; plant-herbivore interactions; pollen analysis; Quaternary; Sporormiella	megafaunal extinction; Pleistocene; Sporormiella; proxy; anachronisms; herbivores; dispersal; diversity; spores; seeds	As a result of the late Quaternary megafaunal extinctions (50 000-10 000 before present (BP)), most continents today are depauperate of megaherbivores. These extinctions were time-transgressive, size-and taxonomically selective, and were caused by climate change, human hunting, or both. The surviving megaherbivores often act as ecological keystones, which was likely true in the past. In spite of …	[Gill, Jacquelyn L.] Univ Wisconsin, Dept Geog, Madison, WI 53706 USA; [Gill, Jacquelyn L.] Brown Univ, Environm Change Initiat, Providence, RI 02912 USA	University of Wisconsin System; University of Wisconsin Madison; Brown University	Gill, JL (corresponding author), Univ Maine, Climate Change Inst, Sch Biol & Ecol, Bangor, ME 04469 USA.	jacquelyn.gill@maine.edu	Gill, Jacquelyn/HCH-8486-2022	Gill, Jacquelyn/0000-0003-0003-6620	NSF [DEB-0716471]; UW Madison Geography Whitbeck Dissertator Fellowship; Brown University's Environmental Change Initiative	NSF(National Science Foundation (NSF)); UW Madison Geography Whitbeck Dissertator Fellowship; Brown University's Environmental Change Initiative	I am very grateful to four anonymous reviewers, whose comments greatly improved this manuscript. This work was supported by NSF DEB-0716471, a UW Madison Geography Whitbeck Dissertator Fellowship and a Voss Postdoctoral Fellowship with Brown University's Environmental Change Initiative. I thank Jack Williams, Sara Hotchkiss, Joe Mason, Jim Burt, David Mladenoff, Warren Porter and Steve Jackson fo…	45	122	137	9	228	WILEY	HOBOKEN	111 RIVER ST, HOBOKEN 07030-5774, NJ USA	0028-646X	1469-8137		NEW PHYTOL	New Phytol.	MAR	2014	201	4	1163	1169		10.1111/nph.12576	http://dx.doi.org/10.1111/nph.12576			7
J	Gill, JL; McLauchlan, KK; Skibbe, AM; Goring, S; Zirbel, CR; Williams, JW	Gill, Jacquelyn L.; McLauchlan, Kendra K.; Skibbe, Adam M.; Goring, Simon; Zirbel, Chad R.; Williams, John W.							Linking abundances of the dung fungus Sporormiella to the density of bison: implications for assessing grazing by megaherbivores in palaeorecords	Journal of Ecology	English	Article	coprophilous fungi; extinction; grasslands; non-pollen palynomorphs; palaeoecology and land use history; palynology; plant-herbivore interactions; Pleistocene megafauna	Late Quaternary extinctions; northern Great Plains; megafaunal extinction; high resolution; source area; lake; pollen; diversity; herbivores; responses	1. Megaherbivores likely had important influences on past vegetation dynamics, just as they do in modern ecosystems. The exact nature of megaherbivores' role can be studied using a relatively new suite of palaeoecological techniques, including the quantification of fossil spores from Sporormiella and other coprophilous fungi as indicators of megafaunal biomass in sediment records. However, a quan…	[Gill, Jacquelyn L.; Goring, Simon; Zirbel, Chad R.; Williams, John W.] Univ Wisconsin, Dept Geog, Madison, WI 53706 USA; [McLauchlan, Kendra K.] Kansas State Univ, Dept Geog, Manhattan, KS 66506 USA; [Skibbe, Adam M.] Kansas State Univ, Div Biol, Konza Prairie LTER Program, Manhattan, KS 66506 USA; [Zirbel, Chad R.] Michigan State Univ, Dept Plant Biol, E Lansing, MI 48824 USA	University of Wisconsin System; University of Wisconsin Madison; Kansas State University; Kansas State University; Michigan State University	Gill, JL (corresponding author), Brown Univ, Environm Change Initiat, Box 1951, Providence, RI 02912 USA.	jacquelynlgill@gmail.com	Williams, John/KBC-5275-2024; Gill, Jacquelyn/HCH-8486-2022; Zirbel, Chad/J-7745-2019	McLauchlan, Kendra/0000-0002-6612-1097; Gill, Jacquelyn/0000-0003-0003-6620; Zirbel, Chad/0000-0002-9289-1722; Goring, Simon/0000-0002-2700-4605	NSF [DEB-0716471]; NSF LTER Program at Konza; University of Wisconsin Geography's Department Whitbeck Fellowship; Bryson Professorship of Climate, People, and the Environment; Direct For Biological Sciences; Division Of Environmental Biology [1020485] Funding Source: National Science Foundation; Direct For Biological Sciences; Division Of Environmental Biology [0823341] Funding Source: National S…	NSF(National Science Foundation (NSF)); NSF LTER Program at Konza; University of Wisconsin Geography's Department Whitbeck Fellowship; Bryson Professorship of Climate, People, and the Environment; Direct For Biological Sciences; Division Of Environmental Biology(National Science Foundation (NSF)NSF - Directorate for Biological Sciences (BIO)); Direct For Biological Sciences; Division Of Environme…	This work was supported by NSF DEB-0716471, the NSF LTER Program at Konza, the University of Wisconsin Geography's Department Whitbeck Fellowship and the Bryson Professorship of Climate, People, and the Environment. We thank the staff at Konza Prairie for logistical support and access to data; Eli Martinson, Nancy Parker and many KSU undergraduates for trap assistance; Guy Robinson for Sporormiel…	58	100	113	3	105	WILEY	HOBOKEN	111 RIVER ST, HOBOKEN 07030-5774, NJ USA	0022-0477	1365-2745		J ECOL	J. Ecol.	SEP	2013	101	5	1125	1136		10.1111/1365-2745.12130	http://dx.doi.org/10.1111/1365-2745.12130			12
J	Gill, JL; Williams, JW; Jackson, ST; Donnelly, JP; Schellinger, GC	Gill, Jacquelyn L.; Williams, John W.; Jackson, Stephen T.; Donnelly, Jeffrey P.; Schellinger, Grace C.							Climatic and megaherbivory controls on late-glacial vegetation dynamics: a new, high-resolution, multi-proxy record from Silver Lake, Ohio	Quaternary Science Reviews	English	Review	fire; Late-Glacial; megafauna; no-analog communities; Ohio; Pleistocene extinctions; pollen; Sporormiella; X-ray fluorescent spectroscopy	Late-Quaternary vegetation; megafaunal extinction; Bayesian analysis; North-American; fire regimes; source area; sediments; Sporormiella; charcoal; history	Novel plant assemblages are a long-recognized feature of late-glacial North America, but identifying their causes has been hampered by inaccurate radiocarbon chronologies and the multiplicity of ecological and climatic events during the late Pleistocene. Recently we reported that the formation of no-analog vegetation may have been linked to declines in Pleistocene megafaunal communities, based on…	[Gill, Jacquelyn L.; Williams, John W.; Schellinger, Grace C.] Univ Wisconsin, Dept Geog, Madison, WI 53713 USA; [Jackson, Stephen T.] Univ Wyoming, Dept Bot, Laramie, WY 82071 USA; [Donnelly, Jeffrey P.] Woods Hole Oceanog Inst, Woods Hole, MA 02543 USA	University of Wisconsin System; University of Wisconsin Madison; University of Wyoming; Woods Hole Oceanographic Institution	Gill, JL (corresponding author), Univ Wisconsin, Dept Geog, 550 N Pk St, Madison, WI 53713 USA.	jlgill@wisc.edu; jww@geography.wisc.edu; Jackson@uwyo.edu; jdonnelly@whoi.edu; schellinger@wisc.edu	Gill, Jacquelyn/HCH-8486-2022; Williams, John/KBC-5275-2024	Jackson, Stephen/0000-0002-1487-4652; Gill, Jacquelyn/0000-0003-0003-6620	NSF [DEB-0716471, DEB-0716951]; Geological Society of America; University of Wisconsin-Madison; Direct For Social, Behav & Economic Scie; Division Of Behavioral and Cognitive Sci [1022868] Funding Source: National Science Foundation	NSF(National Science Foundation (NSF)); Geological Society of America; University of Wisconsin-Madison; Direct For Social, Behav & Economic Scie; Division Of Behavioral and Cognitive Sci(National Science Foundation (NSF)NSF - Directorate for Social, Behavioral & Economic Sciences (SBE))	We are deeply grateful for the detailed comments of two anonymous reviewers, which greatly improved this manuscript. This work was supported by NSF Grants DEB-0716471 and DEB-0716951, a graduate student research grant from the Geological Society of America, and the Climate, People, and Environment Program at the University of Wisconsin-Madison. Initial core description and imaging were done at La…	120	107	129	2	95	PERGAMON-ELSEVIER SCIENCE LTD	OXFORD	THE BOULEVARD, LANGFORD LANE, KIDLINGTON, OXFORD OX5 1GB, ENGLAND	0277-3791	1873-457X		QUATERNARY SCI REV	Quat. Sci. Rev.	2021-02-01	2012	34		66	80		10.1016/j.quascirev.2011.12.008	http://dx.doi.org/10.1016/j.quascirev.2011.12.008			15
J	Gillespie, R; Camens, AB; Worthy, TH; Rawlence, NJ; Reid, C; Bertuch, F; Levchenko, V; Cooper, A	Gillespie, Richard; Camens, Aaron B.; Worthy, Trevor H.; Rawlence, Nicolas J.; Reid, Craig; Bertuch, Fiona; Levchenko, Vladimir; Cooper, Alan							Man and megafauna in Tasmania: closing the gap	Quaternary Science Reviews	English	Article	megafauna; radiocarbon; collagen; extinction; Australia	early human occupation; Australian megafauna; bone-collagen; Pleistocene Australia; climatic-change; extinction; carbon; kangaroos; cave; age	Recent discussion on the late Pleistocene extinction of the Australian megafauna has revolved around interpretation of several key fossil sites in Tasmania. It has been suggested that humans did not arrive in Tasmania until after the megafauna became extinct, or did not hunt now extinct megafauna, and therefore that humans cannot be implicated in the extinctions. Radiocarbon results from these si…	[Gillespie, Richard] Univ Wollongong, Ctr Archaeol Sci, Sch Earth & Environm Sci, Wollongong, NSW 2522, Australia; [Gillespie, Richard] Australian Natl Univ, Div Archaeol & Nat Hist, Sch Culture Hist & Language, Canberra, ACT 0200, Australia; [Rawlence, Nicolas J.; Cooper, Alan] Univ Adelaide, Sch Earth & Environm Sci, Australian Ctr Ancient DNA, Adelaide, SA 5005, Australia; [Worthy, Trevor H.] …	University of Wollongong; Australian National University; University of Adelaide; University of New South Wales Sydney; University of Waikato; Australian Nuclear Science & Technology Organisation	Gillespie, R (corresponding author), Univ Wollongong, Ctr Archaeol Sci, Sch Earth & Environm Sci, Wollongong, NSW 2522, Australia.	dizzy@better.net.au	Gillespie, Robyn/AFR-4963-2022; Cooper, Alan/E-8171-2012; Worthy, Trevor Henry/B-3781-2012	Gillespie, Richard/0000-0003-0555-2595; Worthy, Trevor Henry/0000-0001-7047-4680; Cooper, Alan/0000-0002-7738-7851	School of Earth and Environmental Sciences, University of Wollongong; AINSE [09/068, 10/143]; ARC [20101413]	School of Earth and Environmental Sciences, University of Wollongong; AINSE; ARC(Australian Research Council)	We thank P. Darby and L Gray for guiding us through the Mt. Cripps karst, for assistance in the field we thank J. Metcalf, B. Llamas, J. Wood, F. Salt, H. Geraldene and I. Houshold, and for assistance in identifying specimens we thank G. Medlin, G. Prideaux and W. Boles. For access to reference specimens we thank M. Binnie and B. McHenry at the South Australian Museum, and L Gershwin at QVMAG. We…	75	24	27	11	94	PERGAMON-ELSEVIER SCIENCE LTD	OXFORD	THE BOULEVARD, LANGFORD LANE, KIDLINGTON, OXFORD OX5 1GB, ENGLAND	0277-3791			QUATERNARY SCI REV	Quat. Sci. Rev.	2022-03-01	2012	37		38	47		10.1016/j.quascirev.2012.01.013	http://dx.doi.org/10.1016/j.quascirev.2012.01.013			10
J	Gillespie, R; Horton, D R; Ladd, P; Macumber, P G; Rich, T H; Thorne, R; Wright, R V								Lancefield swamp and the extinction of the Australian megafauna.	Science	English	Article			Excavations into the Australian swamp of Lancefield show that a bone bed dated at 26,000 years ago contains perhaps 10,000 giant extinct animals. Associated artifacts suggest that humans were in the area, but the direct cause of death of the animals is, on present evidence, not explicable. Such a recent date for the classic megafauna shows that it was living together with humans for at least 7000…										8		8											JUN	1978	200	4345	1044	1048		10.1126/science.200.4345.1044-a				5
J	Gillespie, R., Brook, B.W.								Is there a Pleistocene archaeological site at Cuddie Springs?	Archaeology in Oceania	English	Article	extinction; megafauna; Pleistocene; seed-grinding; palaeochannels		The juxtaposition of stone tools, charcoal and bones at Cuddie Springs has been used to support claims that people were butchering now-extinct animals, and grinding seeds about 30,000 BP. Statistical analysis of dates for the site shows significant sediment disturbance, and the anomalous presence of hair residues in the absence of bone collagen suggests that bones and stone tools are not the same…										37														2006	41	1	1	11		10.1002/j.1834-4453.2006.tb00600.x				11
J	Gillespie, R., Brook, B.W., Baynes, A.								Short overlap of humans and megafauna in Pleistocene Australia	Alcheringa	English	Article	Australia; megafauna; extinction; dating; archaeology		Reappraisal of the reliability of numerical dating results for Australian extinct megafauna and archaeology reveals that many still-quoted ages are incorrect and should be eliminated from databases and discussions. We estimate that the megafauna-human overlap period on mainland Australia was about 3900 years (95% confidence interval 3158 to 4642 years) centred ~44,000 calendar years ago. Our resu…										54														2006	30		163	186		10.1080/03115510609506861				23
J	Gilmour, DM; Butler, VL; O'Connor, JE; Davis, EB; Culleton, BJ; Kennett, DJ; Hodgins, G	Gilmour, Daniel M.; Butler, Virginia L.; O'Connor, Jim E.; Davis, Edward Byrd; Culleton, Brendan J.; Kennett, Douglas J.; Hodgins, Gregory							Chronology and ecology of late Pleistocene megafauna in the northern Willamette Valley, Oregon	Quaternary Research	English	Article	megafaunal extinctions; Pleistocene; Pacific Northwest; stable isotopes; Younger Dryas; overkill	Battle Ground Lake; collagen extraction; human coprolites; radiocarbon; Clovis; age; bone; climate; mammals; Jokulhlaups	Since the mid-19th century, western Oregon's Willamette Valley has been a source of remains from a wide variety of extinct megafauna. Few of these have been previously described or dated, but new chronologic and isotopic analyses in conjunction with updated evaluations of stratigraphic context provide substantial new information on the species present, timing of losses, and paleoenvironmental con…	[Gilmour, Daniel M.] Willamette Cultural Resources Associates Ltd, Portland, OR 97214 USA; [Gilmour, Daniel M.; Butler, Virginia L.] Portland State Univ, Dept Anthropol, Portland, OR 97202 USA; [O'Connor, Jim E.] US Geol Survey, Portland, OR 97201 USA; [Davis, Edward Byrd] Univ Oregon, Museum Nat & Cultural Hist, Eugene, OR 97403 USA; [Davis, Edward Byrd] 1272 Univ Oregon, Dept Geol Sci, Eugene, …	Portland State University; United States Department of the Interior; United States Geological Survey; University of Oregon; University of Oregon; Pennsylvania Commonwealth System of Higher Education (PCSHE); Pennsylvania State University; Pennsylvania State University - University Park; National Science Foundation (NSF); University of Arizona; University of Arizona	Gilmour, DM (corresponding author), Willamette Cultural Resources Associates Ltd, 623 SE Mill St, Portland, OR 97214 USA.	danny@willamettecra.com; virginia@pdx.edu; oconnor@usgs.gov; edavis@uoregon.edu; bjc23@psu.edu; djk23@psu.edu; ghodgins@physics.arizona.edu	Hodgins, Gregory/GVT-3022-2022; Kennett, Douglas/I-7613-2015	Hodgins, Gregory/0000-0002-6669-0396	Newman Grant of the Department of Anthropology at Portland State University; annual research grant of the Association of Oregon Archaeologists [2009-AOA]; annual research grant of the Oregon Archaeological Society [OAS-2009]	Newman Grant of the Department of Anthropology at Portland State University; annual research grant of the Association of Oregon Archaeologists; annual research grant of the Oregon Archaeological Society	We wish to thank Y. Addington, K. Ames, A. Farrell, D. Ellingson, M. Full, R. Graham, M. Madan, H. G. McDonald, B. Orr, E. Orr, H. Rutschman, J. Saunders, E. Scott, C. Shaw, and M. Wynne for their constant support and input over the course of this project. M. Adams and P. Solimano helped prepare graphics. Comments from D. Booth, G. Huckleberry, R. L. Lyman, D. Meltzer, and an anonymous reviewer i…	86	15	18	0	42	CAMBRIDGE UNIV PRESS	NEW YORK	32 AVENUE OF THE AMERICAS, NEW YORK, NY 10013-2473 USA	0033-5894	1096-0287		QUATERNARY RES	Quat. Res.	JAN	2015	83	1	127	136		10.1016/j.yqres.2014.09.003	http://dx.doi.org/10.1016/j.yqres.2014.09.003			10
J	González-Guarda, E; Petermann-Pichincura, A; Tornero, C; Domingo, L; Agustí, J; Pino, M; Abarzúa, AM; Capriles, JM; Villavicencio, NA; Labarca, R; Tolorza, V; Sevilla, P; Rivals, F	Gonzalez-Guarda, Erwin; Petermann-Pichincura, Alia; Tornero, Carlos; Domingo, Laura; Agusti, Jordi; Pino, Mario; Abarzua, Ana M.; Capriles, Jose M.; Villavicencio, Natalia A.; Labarca, Rafael; Tolorza, Violeta; Sevilla, Paloma; Rivals, Florent							Multiproxy evidence for leaf-browsing and closed habitats in extinct proboscideans (Mammalia, Proboscidea) from Central Chile	Proceedings of the National Academy of Sciences of the United States of America	English	Article	stable isotopes; dental calculus; dental microwear	dietary reconstruction; isotopic composition; Early Pleistocene; feeding ecology; stable isotopes; Early Holocene; carbon; megafauna, nitrogen; north	Proboscideans are so-called ecosystem engineers and are considered key players in hypotheses about Late Pleistocene megafaunal extinctions. However, knowledge about the autoecology and chronology of the proboscideans in South America is still open to debate and raises controversial views. Here, we used a range of multiproxy approaches and new radiocarbon datings to study the autoecology of Chilea…	[Gonzalez-Guarda, Erwin; Petermann-Pichincura, Alia; Tornero, Carlos; Agusti, Jordi; Rivals, Florent] Inst Catala Paleoecol Humana & Evolucio Social, Biomol Lab, Tarragona 43007, Spain; [Gonzalez-Guarda, Erwin; Domingo, Laura; Sevilla, Paloma] Univ Complutense Madrid, Fac Ciencias Geol, Dept Geodinam Estratig & Paleontol, E-28040 Madrid, Spain; [Gonzalez-Guarda, Erwin] Gest Ambiental SA, Area Arq…	ICREA; Universitat Rovira i Virgili; Catalan Institute of Human Paleo-Ecology & Social Evolution (IPHES); Complutense University of Madrid; Universidad Austral de Chile; Universitat Rovira i Virgili; University of California System; University of California Santa Cruz; ICREA; Pennsylvania Commonwealth System of Higher Education (PCSHE); Pennsylvania State University; Pennsylvania State University…	González-Guarda, E (corresponding author), Inst Catala Paleoecol Humana & Evolucio Social, Biomol Lab, Tarragona 43007, Spain.;González-Guarda, E (corresponding author), Univ Complutense Madrid, Fac Ciencias Geol, Dept Geodinam Estratig & Paleontol, E-28040 Madrid, Spain.;González-Guarda, E (corresponding author), Gest Ambiental SA, Area Arqueol, Santiago 7550000, Chile.	erwingonzalezguarda@gmail.com	Pino, Mario/GPP-7219-2022; Labarca, Rafael/AAM-1633-2020; Domingo, Laura/J-6549-2012; Capriles, José/X-4990-2019; Abarzua, Ana/E-5829-2013; Sevilla, Paloma/Q-2813-2019; Rivals, Florent/B-7962-2014; Pino, Mario/A-2709-2008; Capriles, Jose/J-1520-2014	SEVILLA GARCIA, MARIA PALOMA/0000-0001-7425-7173; Rivals, Florent/0000-0001-8074-9254; Petermann Pichincura, Alia/0000-0003-3311-9377; Tolorza, Violeta/0000-0002-0281-4476; Labarca, Rafael/0000-0002-5791-5522; Pino, Mario/0000-0001-6181-353X; Capriles, Jose/0000-0001-6046-0939; Villavicencio, Natalia A./0000-0001-8453-1914; Abarzua, Ana M/0000-0003-2501-8525	Fondecyt [1150738]; Beatriu de Pinos postdoctoral fellowship (BP-MSCA Cofound from the AGAUR, Goverment of Catalonia, Spain) [2016-00346]; MINECO [CGL 2016-80000-B]; AGAUR [2014-SGR-901, 2017-SGR-836]; Swedish Research Council [2016-00346] Funding Source: Swedish Research Council	Fondecyt(Comision Nacional de Investigacion Cientifica y Tecnologica (CONICYT)CONICYT FONDECYT); Beatriu de Pinos postdoctoral fellowship (BP-MSCA Cofound from the AGAUR, Goverment of Catalonia, Spain); MINECO(Spanish Government); AGAUR(Agencia de Gestio D'Ajuts Universitaris de Recerca Agaur (AGAUR)); Swedish Research Council(Swedish Research Council)	Our manuscript benefited from the professional editing of Dr. Pia Spry-Marques. We are grateful for the funding provided from Fondecyt Grant 1150738 (to M.P.). C.T. acknowledges the Beatriu de Pinos postdoctoral fellowship (BP-MSCA Cofound Code 2016-00346 from the AGAUR, Goverment of Catalonia, Spain). We are also grateful for the funding provided by CGL 2016-80000-B (MINECO) and 2014-SGR-901 and…	52	30	32	0	11	NATL ACAD SCIENCES	WASHINGTON	2101 CONSTITUTION AVE NW, WASHINGTON, DC 20418 USA	0027-8424			P NATL ACAD SCI USA	Proc. Natl. Acad. Sci. U. S. A.	2011-09-01	2018	115	37	9258	9263		10.1073/pnas.1804642115	http://dx.doi.org/10.1073/pnas.1804642115			6
J	Gonzalez, S; Huddart, D; Israde-Alcántara, I; Dominguez-Vazquez, G; Bischoff, J	Gonzalez, Silvia; Huddart, David; Israde-Alcantara, Isabel; Dominguez-Vazquez, Gabriela; Bischoff, James							Tocuila Mammoths, Basin of Mexico: Late Pleistocene-Early Holocene stratigraphy and the geological context of the bone accumulation	Quaternary Science Reviews	English	Article	mammoths; Lake Texcoco; tephra; meteorite airburst; Younger Dryas	Nevado de Toluca; debris flow; volcano; eruption; paleoenvironments; Popocatepetl; Texcoco; Lahar; lake	We report new stratigraphic, tephrochronology and dating results from the Tocuila Mammoth site in the Basin of Mexico. At the site there is evidence for a thin meteorite airburst layer dated between 10,878 and 10,707 cal BC at the onset of the Younger Diyas (YD) cool period. The Upper Toluca Pumice (UTP) tephra marker, caused by a Plinian eruption of the Nevado de Toluca volcano, dated from 10,66…	[Gonzalez, Silvia; Huddart, David] Liverpool John Moores Univ, Sch Nat Sci & Psychol, Liverpool L3 3AF, Merseyside, England; [Israde-Alcantara, Isabel] Univ Michoacana, IIM, Dept Geol & Mineral, Morelia, Michoacan, Mexico; [Dominguez-Vazquez, Gabriela] Univ Michoacana, Fac Biol, Morelia, Michoacan, Mexico; [Bischoff, James] US Geol Survey, Menlo Pk, CA 94025 USA	Liverpool John Moores University; Universidad Michoacana de San Nicolas de Hidalgo; Universidad Michoacana de San Nicolas de Hidalgo; United States Department of the Interior; United States Geological Survey	Gonzalez, S (corresponding author), Liverpool John Moores Univ, Sch Nat Sci & Psychol, Liverpool L3 3AF, Merseyside, England.	S.Gonzalez@ljmu.ac.uk	Gabriela, Dominguez-Vazquez/JPW-8860-2023	Gabriela, Dominguez-Vazquez/0000-0003-2001-7216	Liverpool John Moores University, NERC [NE/C519446/1]; Universidad Michoacana de San Nicolas de Hidalgo, Mexico	Liverpool John Moores University, NERC; Universidad Michoacana de San Nicolas de Hidalgo, Mexico	We thank Luis Morett-Alatorre and his team from the University of Chapingo, Estado de Mexico and Joaquin Arroyo-Cabrales from INAH, Mexico for initially introducing us to the Tocuila Site. We are very grateful to Don Celso Ramirez and family for access to the Tocuila site and Museum for the last 15 years. We acknowledge the help received during initial fieldwork from Gill and Adam Turner and late…	100	15	17	0	23	PERGAMON-ELSEVIER SCIENCE LTD	OXFORD	THE BOULEVARD, LANGFORD LANE, KIDLINGTON, OXFORD OX5 1GB, ENGLAND	0277-3791			QUATERNARY SCI REV	Quat. Sci. Rev.	2015-07-01	2014	96		222	239		10.1016/j.quascirev.2014.02.003	http://dx.doi.org/10.1016/j.quascirev.2014.02.003			18
J	Gretzinger, J; Molak, M; Reiter, E; Pfrengle, S; Urban, C; Neukamm, J; Blant, M; Conard, NJ; Cupillard, C; Dimitrijevic, V; Drucker, DG; Hofman-Kaminska, E; Kowalczyk, R; Krajcarz, MT; Krajcarz, M; Münzel, SC; Peresani, M; Romandini, M; Rufí, I; Soler, J; Terlato, G; Krause, J; Bocherens, H; Schuenemann, VJ	Gretzinger, Joscha; Molak, Martyna; Reiter, Ella; Pfrengle, Saskia; Urban, Christian; Neukamm, Judith; Blant, Michel; Conard, Nicholas J.; Cupillard, Christophe; Dimitrijevic, Vesna; Drucker, Dorothee G.; Hofman-Kaminska, Emilia; Kowalczyk, Rafal; Krajcarz, Maciej T.; Krajcarz, Magdalena; Muenzel, Susanne C.; Peresani, Marco; Romandini, Matteo; Rufi, Isaac; Soler, Joaquim; Terlato, Gabriele; Krau…							Large-scale mitogenomic analysis of the phylogeography of the Late Pleistocene cave bear	Scientific Reports	English	Article		complete mitochrondrial genome; ancient DNA; replacement; extinctions; megafauna; sequence; Europe; humans; carbon; MAFFT	The cave bear (Ursus spelaeus) is one of the Late Pleistocene megafauna species that faced extinction at the end of the last ice age. Although it is represented by one of the largest fossil records in Europe and has been subject to several interdisciplinary studies including palaeogenetic research, its fate remains highly controversial. Here, we used a combination of hybridisation capture and nex…	[Gretzinger, Joscha; Reiter, Ella; Pfrengle, Saskia; Urban, Christian; Neukamm, Judith; Muenzel, Susanne C.; Krause, Johannes; Schuenemann, Verena J.] Univ Tubingen, Inst Archaeol Sci, Tubingen, Germany; [Gretzinger, Joscha; Krause, Johannes] Max Planck Inst Sci Human Hist, Jena, Germany; [Molak, Martyna] Polish Acad Sci, Museum & Inst Zool, Warsaw, Poland; [Urban, Christian; Neukamm, Judith; Sch…	Eberhard Karls University of Tubingen; Polish Academy of Sciences; Museum & Institute of Zoology of the Polish Academy of Sciences; University of Zurich; Eberhard Karls University of Tubingen; Eberhard Karls University of Tubingen; Universite de Franche-Comte; Centre National de la Recherche Scientifique (CNRS); CNRS - Institute of Ecology & Environment (INEE); University of Belgrade; Polish Acad…	Schuenemann, VJ (corresponding author), Univ Tubingen, Inst Archaeol Sci, Tubingen, Germany.;Schuenemann, VJ (corresponding author), Univ Zurich, Inst Evolutionary Med, Zurich, Switzerland.;Bocherens, H; Schuenemann, VJ (corresponding author), Univ Tubingen, Senckenberg Ctr Human Evolut & Palaeoenvironm S H, Tubingen, Germany.;Bocherens, H (corresponding author), Univ Tubingen, Dept Geosci, Tubin…	herve.bocherens@uni-tuebingen.de; verena.schuenemann@iem.uzh.ch	Krause, Johannes/AFP-2642-2022; Dimitrijevic, Vesna/AEU-0560-2022; Krajcarz, Maciej/AGO-7034-2022; Terlato, Gabriele/AAA-2337-2020; Peresani, Marco/X-1343-2019; Drucker, Dorothee G./E-8900-2011; Conard, Nicholas/IAN-0808-2023; Terlato, Gabriele/KLD-6721-2024; Molak, Martyna/O-3835-2014; Soler Subils, Joaquim/HRD-2456-2023; BOCHERENS, Herve/F-3580-2011	Peresani, Marco/0000-0001-6562-6336; Drucker, Dorothee G./0000-0003-0854-4371; Kowalczyk, Rafal/0000-0001-7264-2158; Conard, Nicholas/0000-0002-4633-0385; Hofman-Kaminska, Emilia/0000-0001-7924-5307; Terlato, Gabriele/0000-0001-8889-0180; Schuenemann, Verena/0000-0002-8593-3672; Krause, Johannes/0000-0001-9144-3920; Molak, Martyna/0000-0001-5068-8649; Munzel, Susanne/0000-0002-9871-6335; Urban, C…	Zoran Markovic (Deptartment of Biological Collections); Ministere de la Culture, Sous-Direction de l'Archeologie; University of Zurich's University Research Priority Program Evolution in Action: From Genomes; Maxi Foundation Zurich; Max Planck Society; University of Ferrara [FAR 2016]; Veneto Region; Fondazione CariVerona	Zoran Markovic (Deptartment of Biological Collections); Ministere de la Culture, Sous-Direction de l'Archeologie; University of Zurich's University Research Priority Program Evolution in Action: From Genomes; Maxi Foundation Zurich; Max Planck Society(Max Planck Society); University of Ferrara; Veneto Region(Regione Veneto); Fondazione CariVerona(Fondazione Cariverona)	We thank Thierry Tillet for providing bone material of U.s. ladinicus from Preletang and Abagail Breidenstein for prove reading of the manuscript. Furthermore, we thank Pierre Petrequin (Maison des Sciences de l'Homme et de l'Environnement, Besancon, France) and Helene Grimaud (Musee de Montbeliard, France) for their help in the study of the archaeological material of Casamene cave (Besancon, Fra…	76	32	32	2	15	NATURE PORTFOLIO	BERLIN	HEIDELBERGER PLATZ 3, BERLIN, 14197, GERMANY	2045-2322			SCI REP-UK	Sci Rep	2015-08-01	2019	9				10700	10.1038/s41598-019-47073-z	http://dx.doi.org/10.1038/s41598-019-47073-z			11
J	Grün, R; Eggins, S; Wells, RT; Rhodes, E; Bestland, E; Spooner, N; Ayling, M; Forbes, M; McCulloch, M	Grun, Rainer; Eggins, Stephen; Wells, Rod T.; Rhodes, Ed; Bestland, Erick; Spooner, Nigel; Ayling, Michelle; Forbes, Matt; McCulloch, Malcolm							A cautionary tale from down under:: Dating megafauna site on Kangaroo island, the BlackCreek swamp south Australia	Quaternary Geochronology	English	Article	ESR dating; OSL dating; radiocarbon dating; radioactive disequilibiurn in soils; extinction of megafauna	soil organic matter; U-series; tooth enamel; Pleistocene; extinction; spectrum; teeth	The extinction of the Australian megafauna is presently one of the most hotly contested debates in Australian Quaternary sciences. [Roberts et al., 2001. U-series and ESR analyses of bones and teeth relating to the human burials from Skhul. Journal of Human Evolution. 49, 316-334.] proposed contentiously that the megafauna went extinct within a short time period somewhere in the range of 39,000-5…	Australian Natl Univ, Res Sch Earth Sci, Canberra, ACT 0200, Australia; Australian Natl Univ, Res Sch Pacific & Asian Studies, Canberra, ACT 0200, Australia; Flinders Univ S Australia, Sch Biol Sci, Adelaide, SA 5001, Australia; Flinders Univ S Australia, Sch Chem Phys & Earth Sci, Adelaide, SA 5001, Australia	Australian National University; Australian National University; Flinders University South Australia; Flinders University South Australia	Grün, R (corresponding author), Australian Natl Univ, Res Sch Earth Sci, Canberra, ACT 0200, Australia.	rainer.grun@anu.edu.au	Eggins, Stephen/H-6943-2016; Rhodes, Edward/B-2315-2013; Grun, Rainer/A-1437-2012; Bestland, Erick/F-1311-2015; McCulloch, Malcolm Thomas/C-3651-2009	Eggins, Stephen/0000-0002-0007-5753; Grun, Rainer/0000-0003-1366-3674; Bestland, Erick/0000-0001-8424-9150; McCulloch, Malcolm Thomas/0000-0003-1538-1558				29	19	19	3	15	ELSEVIER SCI LTD	OXFORD	THE BOULEVARD, LANGFORD LANE, KIDLINGTON, OXFORD OX5 1GB, OXON, ENGLAND	1871-1014	1878-0350		QUAT GEOCHRONOL	Quat. Geochronol.	MAY	2006	1	2	142	150		10.1016/j.quageo.2006.05.029	http://dx.doi.org/10.1016/j.quageo.2006.05.029			9
J	Grün, R; Wells, R; Eggins, S; Spooner, N; Aubert, M; Brown, L; Rhodes, E	Grun, R.; Wells, R.; Eggins, S.; Spooner, N.; Aubert, M.; Brown, L.; Rhodes, E.							Electron spin resonance dating of South Australian megafauna sites	Australian Journal of Earth Sciences	English	Article	electron spin resonance dating; extinction; megafauna; South Australia; uranium-series; isotopes	U-series; feldspar radioluminescence; Genyornis newtoni; Kangaroo Island; teeth; age; extinction; enamel	In recent years, there has been much debate about the timing of the Late Pleistocene extinction of the Australian megafauna. Some studies postulated a rapid, continental-wide extinction at around 46 000 years ago and that the arrival of humans in Australia, rather than climatic fluctuations, was the main cause for the demise of the megafauna. We have applied electron spin resonance (ESR) dating t…	[Grun, R.; Eggins, S.; Spooner, N.; Aubert, M.; Brown, L.; Rhodes, E.] Australian Natl Univ, Res Sch Earth Sci, Canberra, ACT 0200, Australia; [Grun, R.; Rhodes, E.] Australian Natl Univ, Res Sch Pacific & Asian Studies, Canberra, ACT 0200, Australia; [Wells, R.] Flinders Univ S Australia, Sch Biol Sci, Adelaide, SA 5001, Australia	Australian National University; Australian National University; Flinders University South Australia	Grün, R (corresponding author), Australian Natl Univ, Res Sch Earth Sci, GPO Box 4, Canberra, ACT 0200, Australia.	rainer.grun@anu.edu.au	Rhodes, Edward/B-2315-2013; Aubert, Maxime/AAT-6198-2020; Eggins, Stephen/H-6943-2016; Grun, Rainer/A-1437-2012	Grun, Rainer/0000-0003-1366-3674; Aubert, Maxime/0000-0002-4189-531X; Eggins, Stephen/0000-0002-0007-5753	ARC [0342788]; South Australian Department for Environment and Heritage	ARC(Australian Research Council); South Australian Department for Environment and Heritage(Department for Environment, Food & Rural Affairs (DEFRA))	This study was carried out in conjunction with ARC Discovery Project DP 0342788 'Stable isotopes in marsupials: reconstruction of environmental change in Australia,' and funding from the South Australian Department for Environment and Heritage. We thank two anonymous referees whose efforts greatly improved this paper and Tegan Kelly, Research School of Earth Sciences, for corrections.	71	25	25	4	21	TAYLOR & FRANCIS LTD	ABINGDON	2-4 PARK SQUARE, MILTON PARK, ABINGDON OR14 4RN, OXON, ENGLAND	0812-0099	1440-0952		AUST J EARTH SCI	Aust. J. Earth Sci.		2008	55	2025-07-06	917	935		10.1080/08120090802097419	http://dx.doi.org/10.1080/08120090802097419			19
J	Hamm, G; Mitchell, P; Arnold, LJ; Prideaux, GJ; Questiaux, D; Spooner, NA; Levchenko, VA; Foley, EC; Worthy, TH; Stephenson, B; Coulthard, V; Coulthard, C; Wilton, S; Johnston, D	Hamm, Giles; Mitchell, Peter; Arnold, Lee J.; Prideaux, Gavin J.; Questiaux, Daniele; Spooner, Nigel A.; Levchenko, Vladimir A.; Foley, Elizabeth C.; Worthy, Trevor H.; Stephenson, Birgitta; Coulthard, Vincent; Coulthard, Clifford; Wilton, Sophia; Johnston, Duncan							Cultural innovation and megafauna interaction in the early settlement of arid Australia	Nature	English	Article		Late Pleistocene; single grains; luminescence; quartz; extinction; loess; Holocene; south; OSL; distributions	Elucidating the material culture of early people in arid Australia and the nature of their environmental interactions is essential for understanding the adaptability of populations and the potential causes of megafaunal extinctions 50-40 thousand years ago (ka). Humans colonized the continent by 50 ka(1,2), but an apparent lack of cultural innovations compared to people in Europe and Africa(3,4) …	[Hamm, Giles; Foley, Elizabeth C.] La Trobe Univ, Dept Archaeol & Hist, Melbourne, Vic 3083, Australia; [Mitchell, Peter] Geomorph Consultant Gladesville, Sydney, NSW 2111, Australia; [Arnold, Lee J.] Univ Adelaide, Inst Environm, Sch Phys Sci, Adelaide, SA 5005, Australia; [Arnold, Lee J.] Univ Adelaide, Inst Photon & Adv Sensing, Adelaide, SA 5005, Australia; [Prideaux, Gavin J.; Worthy, Trevor…	La Trobe University; University of Adelaide; University of Adelaide; Flinders University South Australia; University of Adelaide; Defence Science & Technology; Australian Nuclear Science & Technology Organisation; University of Queensland	Hamm, G (corresponding author), La Trobe Univ, Dept Archaeol & Hist, Melbourne, Vic 3083, Australia.	A.R.A.S@bigpond.com	Worthy, Trevor Henry/B-3781-2012; Arnold, Lee/J-4356-2018	Worthy, Trevor Henry/0000-0001-7047-4680; Questiaux, Danielle/0000-0002-3325-1784; Foley, Elizabeth/0009-0000-1851-6513; Arnold, Lee/0000-0001-9603-3824; Prideaux, Gavin/0000-0002-9958-0265	Australian Research Council [FT130100195, FT130101728]; Australian Government through the National Collaborative Research Infrastructure Strategy (NCRIS); Australian Research Council [FT130100195, FT130101728] Funding Source: Australian Research Council	Australian Research Council(Australian Research Council); Australian Government through the National Collaborative Research Infrastructure Strategy (NCRIS)(Australian GovernmentDepartment of Industry, Innovation and Science); Australian Research Council(Australian Research Council)	The fieldwork was undertaken with the approval of Adnyamathanha Traditional Lands Association (ATLA) and the South Australian Department of Aboriginal Affairs and Reconciliation. We thank for their contributions: A Coulthard who participated in the fieldwork; R. Frank for his support both in the field and with drawing site maps; field assistants L. Foley and S. Adams; R. Cosgrove provided faunal …	67	97	107	1	68	NATURE PUBLISHING GROUP	LONDON	MACMILLAN BUILDING, 4 CRINAN ST, LONDON N1 9XW, ENGLAND	0028-0836	1476-4687		NATURE	Nature	2010-11-01	2016	539	7628	280	+		10.1038/nature20125	http://dx.doi.org/10.1038/nature20125			18
J	Hansford, J; Wright, PC; Rasoamiaramanana, A; Pérez, VR; Godfrey, LR; Errickson, D; Thompson, T; Turvey, ST	Hansford, James; Wright, Patricia C.; Rasoamiaramanana, Armand; Perez, Ventura R.; Godfrey, Laurie R.; Errickson, David; Thompson, Tim; Turvey, Samuel T.							Early Holocene human presence in Madagascar evidenced by exploitation of avian megafauna	Science Advances	English	Article		mitochondrial DNA; giant lemurs; ancient DNA; cut marks; extinction; Ampasambazimba; Hippopotamus; grasslands; landscape; diversity	Previous research suggests that people first arrived on Madagascar by similar to 2500 years before present (years B.P.). This hypothesis is consistent with butchery marks on extinct lemur bones from similar to 2400 years B.P. and perhaps with archaeological evidence of human presence from similar to 4000 years B.P. We report >10,500-year-old human-modified bones for the extinct elephant birds Aep…	[Hansford, James; Turvey, Samuel T.] Zool Soc London, Inst Zool, Regents Pk, London NW1 4RY, England; [Hansford, James] Southampton Univ Southampton, Natl Oceanog Ctr Southampton, Ocean & Earth Sci, Waterfront Campus,European Way, Southampton SO14 3ZH, Hants, England; [Wright, Patricia C.] SUNY Stony Brook, Dept Anthropol, Stony Brook, NY 11794 USA; [Wright, Patricia C.] Ctr ValBio, Ranomafana 31…	Zoological Society of London; University of Southampton; NERC National Oceanography Centre; State University of New York (SUNY) System; Stony Brook University; University Antananarivo; University of Massachusetts System; University of Massachusetts Amherst; University of Teesside	Hansford, J (corresponding author), Zool Soc London, Inst Zool, Regents Pk, London NW1 4RY, England.;Hansford, J (corresponding author), Southampton Univ Southampton, Natl Oceanog Ctr Southampton, Ocean & Earth Sci, Waterfront Campus,European Way, Southampton SO14 3ZH, Hants, England.	hansford.james@gmail.com		Thompson, Tim/0000-0003-3265-524X; Hansford, James/0000-0002-5702-8915; Errickson, David/0000-0002-9792-671X	NRCF [NF/2015/1/4]	NRCF	This study was supported by an NRCF grant (NF/2015/1/4).	44	85	92	2	22	AMER ASSOC ADVANCEMENT SCIENCE	WASHINGTON	1200 NEW YORK AVE, NW, WASHINGTON, DC 20005 USA	2375-2548			SCI ADV	Sci. Adv.	SEP	2018	4	9			eaat6925	10.1126/sciadv.aat6925	http://dx.doi.org/10.1126/sciadv.aat6925			6
J	Hansford, JP; Turvey, ST	Hansford, James P.; Turvey, Samuel T.							Dietary isotopes of Madagascar's extinct megafauna reveal holocene browsing and grazing guilds	Biology Letters	English	Article	elephant bird; hippopotamus; isotope ecology; megafauna; quaternary extinction	stable isotopes; forest; evolutionary; grasslands; eggshell; grasses; acid	Megafauna play a disproportionate role in developing and maintaining their biomes, by regulating plant dispersal, community structure and nutrient cycling. Understanding the ecological roles of extinct megafaunal communities, for example through dietary reconstruction using isotope analysis, is necessary to determine pre-human states and set evidence-based restoration goals. We use delta C-13 and…	[Hansford, James P.; Turvey, Samuel T.] Zool Soc London, Inst Zool, Regents Pk, London NW1 4RY, England; [Hansford, James P.] Northern Illinois Univ, Dept Biol Sci, De Kalb, IL 60115 USA; [Hansford, James P.] Univ Southampton, Natl Oceanog Ctr, Sch Ocean & Earth Sci, Southampton, Hants, England	Zoological Society of London; Northern Illinois University; NERC National Oceanography Centre; University of Southampton	Hansford, JP (corresponding author), Zool Soc London, Inst Zool, Regents Pk, London NW1 4RY, England.;Hansford, JP (corresponding author), Northern Illinois Univ, Dept Biol Sci, De Kalb, IL 60115 USA.;Hansford, JP (corresponding author), Univ Southampton, Natl Oceanog Ctr, Sch Ocean & Earth Sci, Southampton, Hants, England.	james.hansford@ioz.ac.uk						50	8	8	1	5	ROYAL SOC	LONDON	6-9 CARLTON HOUSE TERRACE, LONDON SW1Y 5AG, ENGLAND	1744-9561	1744-957X		BIOL LETTERS	Biol. Lett.	2013-04-01	2022	18	4			20220094	10.1098/rsbl.2022.0094	http://dx.doi.org/10.1098/rsbl.2022.0094			6
J	Hansford, JP; Turvey, ST	Hansford, James P.; Turvey, Samuel T.							Unexpected diversity within the extinct elephant birds (Aves: Aepyornithidae) and a new identity for the world's largest bird	Royal Society Open Science	English	Article	Aepyornis; Madagascar; megafauna; Mullerornis; multiple imputation; Quaternary extinction	evolutionary history; size; moa; DNA; Pleistocene; dimorphism; specimens; eggshell; nuclear; biology	Madagascar's now-extinct radiation of large-bodied ratites, the elephant birds (Aepyornithidae), has been subject to little modem research compared to the island's mammalian megafauna and other Late Quaternary giant birds. The family's convoluted and conflicting taxonomic history has hindered accurate interpretation of morphological diversity and has restricted modern research into their evolutio…	[Hansford, James P.; Turvey, Samuel T.] Zool Soc London, Inst Zool, Regents Pk, London NW1 4RY, England; [Hansford, James P.] Univ Southampton, Natl Oceanog Ctr Southampton, Ocean & Earth Sci, Waterfront Campus,European Way, Southampton S014 3ZH, Hants, England	Zoological Society of London; NERC National Oceanography Centre; University of Southampton	Hansford, JP (corresponding author), Zool Soc London, Inst Zool, Regents Pk, London NW1 4RY, England.;Hansford, JP (corresponding author), Univ Southampton, Natl Oceanog Ctr Southampton, Ocean & Earth Sci, Waterfront Campus,European Way, Southampton S014 3ZH, Hants, England.	james.hansford@ioz.ac.uk		Hansford, James/0000-0002-5702-8915	Royal Society University Research Fellowship [UF130573]; NCRF [NF/2015/1/4]	Royal Society University Research Fellowship(Royal Society); NCRF	Funding was provided by a Royal Society University Research Fellowship to S.T.T. (UF130573) and by NCRF grant no. NF/2015/1/4.	74	28	33	1	22	ROYAL SOC	LONDON	6-9 CARLTON HOUSE TERRACE, LONDON SW1Y 5AG, ENGLAND	2054-5703			ROY SOC OPEN SCI	R. Soc. Open Sci.	SEP	2018	5	9			181295	10.1098/rsos.181295	http://dx.doi.org/10.1098/rsos.181295			28
J	Hardy, FC; Rowland, SM	Hardy, Fabian Ceron; Rowland, Stephen M.							Stable isotopic analysis of fossil Bison tooth enamel indicates flexible dietary ecology across Pleistocene North America	Quaternary Science Reviews	English	Article	Paleontology; paleoecology; bison; stable isotopes	Ziegler reservoir; Snowmass village; oxygen isotopes; southern California; carbon isotopes; UnitesStates; Great-Plains; La Brea; plant; mammals	The arrival of Bison in North America significantly affected competitive relationships among herbivores and may have played an important role in the eventual extinction of contemporaneous Pleistocene megafaunal taxa. To investigate the dietary ecology of fossil bison and examine the potential for such an ecological impact, we analyzed the stable carbon and oxygen isotope composition of Bison lati…	[Hardy, Fabian Ceron] Univ Michigan, Dept Ecol & Evolutionary Biol, Ann Arbor, MI USA; [Rowland, Stephen M.] Univ Nevada Las Vegas, Dept Geosci, Las Vegas, NV USA	University of Michigan System; University of Michigan; Nevada System of Higher Education (NSHE); University of Nevada Las Vegas	Hardy, FC (corresponding author), Univ Michigan, Biol Sci Bldg,1105 North Univ Ave,Room 3102, Ann Arbor, MI 48103 USA.	hardyf@umich.edu		Hardy, Fabian/0000-0002-9000-7227	UNLV Graduate and Professional Student Association; Geological Society of America Rocky Mountain and Cordilleran Sections; UNLV Department of Geoscience	UNLV Graduate and Professional Student Association; Geological Society of America Rocky Mountain and Cordilleran Sections; UNLV Department of Geoscience	Funding was provided by the UNLV Graduate and Professional Student Association, Geological Society of America Rocky Mountain and Cordilleran Sections, and the UNLV Department of Geoscience. We thank Matt Lachniet, Scott Nowicki, Brett Riddle, Josh Bonde, and anonymous reviewers for their insight and technical suggestions that improved this project. Institutions and individuals who graciously prov…	116	1	1	1	2	PERGAMON-ELSEVIER SCIENCE LTD	OXFORD	THE BOULEVARD, LANGFORD LANE, KIDLINGTON, OXFORD OX5 1GB, ENGLAND	0277-3791	1873-457X		QUATERNARY SCI REV	Quat. Sci. Rev.	2015-06-01	2024	334				108741	10.1016/j.quascirev.2024.108741	http://dx.doi.org/10.1016/j.quascirev.2024.108741		2024-06-01	14
J	Haury, E.W.; Sayles, E.B.; Wasley, W.W.	Haury, E.W.; Sayles, E.B.; Wasley, W.W.							The Lehner mammoth site, southeastern Arizona	American Antiquity	English	Article			In 1955-56 the Arizona State Museum excavated an elephant-kill site on the Lehner ranch in the San Pedro valley, near Hereford, Arizona, and found 13 projectiles, mainly Clovis fluted points, eight butchering tools, and charcoal from two fires among the remains of nine immature mammoths and elements of horse, bison, and tapir. Bones and artifacts occurred on and in gravels of a former perennial s…										0	133	157	0	0	SOC AMER ARCHAEOLOGY	WASHINGTON	900 SECOND ST., NE WASHINGTON, DC 20002-3557	0002-7316			AM ANTIQUITY	Am. Antiq.		1959	25	1	2	30		10.2307/276674	http://dx.doi.org/10.2307/276674			29
J	Haynes, CV	Haynes, C. Vance, Jr.							Younger Dryas black mats and the Rancholabrean termination in North America	Proceedings of the National Academy of Sciences of the United States of America	English	Article	climate change; extinction; radio carbon; stratigraphy; archeology	age; drought; Clovis	Of the 97 geoarchaeological sites of this study that bridge the Pleistocene-Holocene transition (last deglaciation), approximately two thirds have a black organic-rich layer or black mat in the form of mollic paleosols, aquolls, diatomites, or algal mats with radiocarbon ages suggesting they are stratigraphic manifestations of the Younger Dryas cooling episode 10,900 B.P. to 9,800 B.P. (radiocarb…	[Haynes, C. Vance, Jr.] Univ Arizona, Dept Anthropol, Tucson, AZ 85721 USA; [Haynes, C. Vance, Jr.] Univ Arizona, Dept Geosci, Tucson, AZ 85721 USA	University of Arizona; University of Arizona	Haynes, CV (corresponding author), Univ Arizona, Dept Anthropol, POB 210030, Tucson, AZ 85721 USA.	cml@email.arizona.edu						54	161	187	2	63	NATL ACAD SCIENCES	WASHINGTON	2101 CONSTITUTION AVE NW, WASHINGTON, DC 20418 USA	0027-8424			P NATL ACAD SCI USA	Proc. Natl. Acad. Sci. U. S. A.	2006-05-01	2008	105	18	6520	6525		10.1073/pnas.0800560105	http://dx.doi.org/10.1073/pnas.0800560105			6
J	Hedberg, CP; Lyons, SK; Smith, FA	Hedberg, Carson P.; Lyons, S. Kathleen; Smith, Felisa A.							The hidden legacy of megafaunal extinction: Loss of functional diversity and resilience over the Late Quaternary at Hall's Cave	Global Ecology and Biogeography	English	Article	biodiversity; conservation; functional diversity; Late Quaternary; megafauna; palaeoecology	biodiversity loss; species richness; Pleistocene; community; framework; mammals; plant; mass; herbivores; indexes	Aim Functional traits mediate the interactions of species among themselves and with their environment, providing a link between diversity and ecosystem function. Crucially, the loss of biodiversity can jeopardize the functionality of ecosystems. Much focus is on predicting the impacts of current and future species loss; however, modern ecosystems have undergone biodiversity decline throughout the…	[Hedberg, Carson P.; Smith, Felisa A.] Univ New Mexico, Dept Biol, Albuquerque, NM 87131 USA; [Lyons, S. Kathleen] Univ Nebraska, Sch Biol Sci, Lincoln, NE USA	University of New Mexico; University of Nebraska System; University of Nebraska Lincoln	Hedberg, CP (corresponding author), Univ New Mexico, Dept Biol, Albuquerque, NM 87131 USA.	chedberg@unm.edu	Smith, Felisa/ABE-6160-2021	Hedberg, Carson/0000-0003-2527-0069; Smith, Felisa/0000-0001-6262-436X; Lyons, S. Kathleen/0000-0001-5112-2508	National Science Foundation Graduate Research Fellowship [DGE-1418062]; National Science Foundation [DEB 1744223]	National Science Foundation Graduate Research Fellowship(National Science Foundation (NSF)); National Science Foundation(National Science Foundation (NSF))	National Science Foundation Graduate Research Fellowship, Grant/Award Number: DGE-1418062; National Science Foundation, Grant/Award Number: DEB 1555525; National Science Foundation, Grant/Award Number: DEB 1744223	71	9	9	1	23	WILEY	HOBOKEN	111 RIVER ST, HOBOKEN 07030-5774, NJ USA	1466-822X	1466-8238		GLOBAL ECOL BIOGEOGR	Glob. Ecol. Biogeogr.	FEB	2022	31	2	294	307		10.1111/geb.13428	http://dx.doi.org/10.1111/geb.13428		2021-11-01	14
J	Hernández, F; Ríos, C; Perotto-Baldivieso, HL	Hernandez, Fidel; Rios, Carlos; Perotto-Baldivieso, Humberto L.							Evolutionary history of herbivory in the Patagonian steppe: The role of climate, ancient megafauna, and guanaco	Quaternary Science Reviews	English	Article	evolutionary history of herbivory; grazing; guanaco; Late-Pleistocene extinction; megafauna; Patagonian steppe	southern South America; Late Pleistocene; functional traits; lama guanicoe; mammalian herbivores; population density; feeding ecology; mammoth steppe; body mass; Holocene	Herbivory is an important ecological process than has influenced the evolution of grassland-savannah systems. The evolutionary history of herbivory largely determines how resilient plant communities are to herbivory, with communities evolving with a long history generally possessing plant adaptations that make them able to cope with such disturbance. Thus, the evolutionary history of herbivory ca…	[Hernandez, Fidel; Perotto-Baldivieso, Humberto L.] Texas A&M Univ, Caesar Kleberg Wildlife Res Inst, Kingsville, TX 78363 USA; [Rios, Carlos] Univ Magallanes, Inst Patagonia, Punta Arenas, Magallanes Prov, Chile	Texas A&M University System; Texas A&M University Kingsville; Universidad de Magallanes	Hernández, F (corresponding author), Texas A&M Univ, Caesar Kleberg Wildlife Res Inst, Kingsville, TX 78363 USA.	fidel.hernandez@tamuk.edu; carlos.rios@umag.cl; humberto.perotto@tamuk.edu	rios, carlos/AHD-6173-2022; Perotto-Baldivieso, Humberto/JVY-7743-2024		US Fulbright Scholar Program via a teaching and research award; Caesar Kleberg Wildlife Research Institute at Texas A&M University -Kingsville; Instituto de la Patagonia de la Universidad de Magallanes; Alfred C. Glassell, Jr. Endowed Professorship in Quail Research; R. M. Kleberg, Jr. Center for Quail Research	US Fulbright Scholar Program via a teaching and research award; Caesar Kleberg Wildlife Research Institute at Texas A&M University -Kingsville; Instituto de la Patagonia de la Universidad de Magallanes; Alfred C. Glassell, Jr. Endowed Professorship in Quail Research; R. M. Kleberg, Jr. Center for Quail Research	This research was supported by the US Fulbright Scholar Program via a teaching and research award to F. Hernandez. We thank the Caesar Kleberg Wildlife Research Institute at Texas A&M University -Kingsville and the Instituto de la Patagonia de la Universidad de Magallanes for providing financial and logistical support during the Fulbright Award. FH was supported by the Alfred C. Glassell, Jr. End…	133	11	12	0	21	PERGAMON-ELSEVIER SCIENCE LTD	OXFORD	THE BOULEVARD, LANGFORD LANE, KIDLINGTON, OXFORD OX5 1GB, ENGLAND	0277-3791	1873-457X		QUATERNARY SCI REV	Quat. Sci. Rev.	2015-09-01	2019	220		279	290		10.1016/j.quascirev.2019.07.014	http://dx.doi.org/10.1016/j.quascirev.2019.07.014			12
J	Hixon, SW; Curtis, JH; Brenner, M; Douglass, KG; Domic, AI; Culleton, BJ; Ivory, SJ; Kennett, DJ	Hixon, Sean W.; Curtis, Jason H.; Brenner, Mark; Douglass, Kristina G.; Domic, Alejandra, I; Culleton, Brendan J.; Ivory, Sarah J.; Kennett, Douglas J.							Drought Coincided with, but Does Not Explain, Late Holocene Megafauna Extinctions in SW Madagascar	Climate	English	Article	stable isotopes; radiocarbon; charcoal; aridification; deforestation; zebu; pygmy hippos; giant lemurs	environmental changes; climate variability; Bayesian-analysis; giant tortoises; stable carbon; bone; radiocarbon; reconstructions; biodiversity; communities	Climate drying could have transformed ecosystems in southern Madagascar during recent millennia by contributing to the extinction of endemic megafauna. However, the extent of regional aridification during the past 2000 years is poorly known, as are the responses of endemic animals and economically important livestock to drying. We inferred similar to 1600 years of climate change around Lake Ranob…	[Hixon, Sean W.; Kennett, Douglas J.] Univ Calif Santa Barbara, Dept Anthropol, Santa Barbara, CA 93106 USA; [Curtis, Jason H.; Brenner, Mark] Univ Florida, Dept Geol Sci, Gainesville, FL 32611 USA; [Curtis, Jason H.; Brenner, Mark] Univ Florida, Land Use & Environm Change Inst, Gainesville, FL 32611 USA; [Douglass, Kristina G.] Penn State Univ, Dept Anthropol, University Pk, PA 16802 USA; [Dougl…	University of California System; University of California Santa Barbara; State University System of Florida; University of Florida; State University System of Florida; University of Florida; Pennsylvania Commonwealth System of Higher Education (PCSHE); Pennsylvania State University; Pennsylvania State University - University Park; Pennsylvania Commonwealth System of Higher Education (PCSHE); Penn…	Hixon, SW (corresponding author), Univ Calif Santa Barbara, Dept Anthropol, Santa Barbara, CA 93106 USA.	hixon@ucsb.edu; curtisj@ufl.edu; brenner@ufl.edu; kdouglass@psu.edu; aid4@psu.edu; bjc23@psu.edu; sji15@psu.edu; kennett@anth.ucsb.edu		Curtis, Jason/0000-0003-0884-9941; Brenner, Mark/0000-0001-9837-012X; Ivory, Sarah/0000-0003-4709-4406; Domic Rivadeneira, Alejandra Iboya/0000-0003-0762-3967; Hixon, Sean/0000-0001-6147-7118	PSU Energy and Environmental Sustainability Laboratories; National Science Foundation [GRFP-2015213455, DDRI-1838393]; NSF [IES 1840968]	PSU Energy and Environmental Sustainability Laboratories; National Science Foundation(National Science Foundation (NSF)); NSF(National Science Foundation (NSF))	This research was funded by the PSU Energy and Environmental Sustainability Laboratories and National Science Foundation Grants GRFP-2015213455 [S.H.], Archaeology DDRI-1838393 [D.K. and S.H.], and NSF-IES 1840968 [S.I.].	101	10	10	0	10	MDPI	BASEL	ST ALBAN-ANLAGE 66, CH-4052 BASEL, SWITZERLAND		2225-1154		CLIMATE	Climate	SEP	2021	9	9			138	10.3390/cli9090138	http://dx.doi.org/10.3390/cli9090138			25
J	Hixon, SW; Douglass, KG; Crowley, BE; Rakotozafy, LMA; Clark, G; Anderson, A; Haberle, S; Ranaivoarisoa, JF; Buckley, M; Fidiarisoa, S; Mbola, B; Kennett, DJ	Hixon, Sean W.; Douglass, Kristina G.; Crowley, Brooke E.; Rakotozafy, Lucien Marie Aime; Clark, Geoffrey; Anderson, Atholl; Haberle, Simon; Ranaivoarisoa, Jean Freddy; Buckley, Michael; Fidiarisoa, Salomon; Mbola, Balzac; Kennett, Douglas J.							Late Holocene spread of pastoralism coincides with endemic megafaunal extinction on Madagascar	Proceedings of the Royal Society B-Biological Sciences	English	Article	extinction; megafauna; pastoralism; palaeoecology; radiocarbon; competition	landscape; ecology; island	Recently expanded estimates for when humans arrived on Madagascar (up to approximately 10 000 years ago) highlight questions about the causes of the island's relatively late megafaunal extinctions (approximately 2000-500 years ago). Introduced domesticated animals could have contributed to extinctions, but the arrival times and past diets of exotic animals are poorly known. To conduct the first e…	[Hixon, Sean W.; Kennett, Douglas J.] Univ Calif Santa Barbara, Dept Anthropol, Santa Barbara, CA 93106 USA; [Douglass, Kristina G.] Penn State Univ, Dept Anthropol, State Coll, PA 16802 USA; [Crowley, Brooke E.] Univ Cincinnati, Dept Geol, Cincinnati, OH 45221 USA; [Crowley, Brooke E.] Univ Cincinnati, Dept Anthropol, Cincinnati, OH 45221 USA; [Rakotozafy, Lucien Marie Aime] Univ Antananarivo, M…	University of California System; University of California Santa Barbara; Pennsylvania Commonwealth System of Higher Education (PCSHE); Pennsylvania State University; University System of Ohio; University of Cincinnati; University System of Ohio; University of Cincinnati; University Antananarivo; Australian National University; Australian National University; University Antananarivo; University of…	Hixon, SW (corresponding author), Univ Calif Santa Barbara, Dept Anthropol, Santa Barbara, CA 93106 USA.	hixon@ucsb.edu		Douglass, Kristina/0000-0003-0931-3428; Crowley, Brooke/0000-0002-8462-6806; Hixon, Sean/0000-0001-6147-7118; Buckley, Michael/0000-0002-4166-8213; Haberle, Simon/0000-0001-5802-6535; Clark, Geoffrey/0000-0002-9055-655X	National Science Foundation [2015213455, 1838393, 1749676]; Royal Society [UF120473]; Sigma Xi; American Philosophical Society; Society for Archaeological Science; Max Planck Institute for the Science of Human History; PSU Energy and Environmental Sustainability Laboratories; PSU Africana Research Center; PSU Anthropology Department; NSF Archaeometry Program [BCS-1460367]; Pennsylvania State Univ…	National Science Foundation(National Science Foundation (NSF)); Royal Society(Royal Society); Sigma Xi; American Philosophical Society; Society for Archaeological Science; Max Planck Institute for the Science of Human History; PSU Energy and Environmental Sustainability Laboratories; PSU Africana Research Center; PSU Anthropology Department; NSF Archaeometry Program; Pennsylvania State University…	This research was supported by National Science Foundation grants GRFP 2015213455 (S.W.H.), Archaeology DDRI 1838393 (D.J.K. and S.W.H.) and BCS 1749676 (B.E.C.), and by additional funding from the Royal Society UF120473 (M.B.), Sigma Xi, the American Philosophical Society, Society for Archaeological Science, the Max Planck Institute for the Science of Human History, PSU Energy and Environmental …	58	36	36	0	18	ROYAL SOC	LONDON	6-9 CARLTON HOUSE TERRACE, LONDON SW1Y 5AG, ENGLAND	0962-8452	1471-2954		P ROY SOC B-BIOL SCI	Proc. R. Soc. B-Biol. Sci.	2028-07-01	2021	288	1955			20211204	10.1098/rspb.2021.1204	http://dx.doi.org/10.1098/rspb.2021.1204			10
J	Hocknull, SA; Lewis, R; Arnold, LJ; Pietsch, T; Joannes-Boyau, R; Price, GJ; Moss, P; Wood, R; Dosseto, A; Louys, J; Olley, J; Lawrence, RA	Hocknull, Scott A.; Lewis, Richard; Arnold, Lee J.; Pietsch, Tim; Joannes-Boyau, Renaud; Price, Gilbert J.; Moss, Patrick; Wood, Rachel; Dosseto, Anthony; Louys, Julien; Olley, Jon; Lawrence, Rochelle A.							Extinction of eastern Sahul megafauna coincides with sustained environmental deterioration	Nature Communications	English	Article		Middle Paleolithic site; Australia New-Guinea; Late Pleistocene; Late Quaternary; northern Australia; climate change; archaeological site; humid tropics; record; luminescence	Explanations for the Upper Pleistocene extinction of megafauna from Sahul (Australia and New Guinea) remain unresolved. Extinction hypotheses have advanced climate or human-driven scenarios, in spite of over three quarters of Sahul lacking reliable biogeographic or chronologic data. Here we present new megafauna from north-eastern Australia that suffered extinction sometime after 40,100 (+/- 1700…	[Hocknull, Scott A.; Lawrence, Rochelle A.] Queensland Museum, Geosci, 122 Gerler Rd, Hendra, Qld 4011, Australia; [Hocknull, Scott A.] Univ Melbourne, Fac Sci, Sch BioSci, Melbourne, Vic 3010, Australia; [Lewis, Richard; Arnold, Lee J.] Univ Adelaide, Sch Phys Sci, Environm Inst, North Terrace Campus, Adelaide, SA 5005, Australia; [Lewis, Richard; Arnold, Lee J.] Univ Adelaide, Inst Photon & Adv…	Queensland Museum; University of Melbourne; University of Adelaide; University of Adelaide; Griffith University; Southern Cross University; University of Queensland; Australian National University; Australian National University; University of Wollongong; Griffith University; Griffith University - Mount Gravatt Campus	Hocknull, SA (corresponding author), Queensland Museum, Geosci, 122 Gerler Rd, Hendra, Qld 4011, Australia.;Hocknull, SA (corresponding author), Univ Melbourne, Fac Sci, Sch BioSci, Melbourne, Vic 3010, Australia.	scott.hocknull@qm.qld.gov.au	Louys, Julien/GLN-6714-2022; Moss, Patrick/AFM-9408-2022; Wood, Rachel/K-5577-2016; Dosseto, Anthony/A-2543-2008; Joannes-Boyau, Renaud/D-6058-2012; Arnold, Lee/J-4356-2018; Price, Gilbert/N-3282-2013	Wood, Rachel/0000-0002-1694-3295; Dosseto, Anthony/0000-0002-3575-0106; Joannes-Boyau, Renaud/0000-0002-0452-486X; Arnold, Lee/0000-0001-9603-3824; Moss, Patrick/0000-0003-1546-9242; Lawrence, Rochelle/0000-0002-2855-4238; Lewis, Richard/0000-0002-6575-8483; Hocknull, Scott/0000-0003-4157-8434; Price, Gilbert/0000-0001-8406-4594	Queensland Museum Foundation; Queensland Museum; BHP; BHP Mitsui Coal; BMA; Australian research Council [FT130100195, DP0881279, DP120101752]; ARC [FT160100450]; Australian Research Council [DP0881279, FT130100195] Funding Source: Australian Research Council	Queensland Museum Foundation; Queensland Museum; BHP; BHP Mitsui Coal; BMA; Australian research Council(Australian Research Council); ARC(Australian Research Council); Australian Research Council(Australian Research Council)	We acknowledge and pay respect to the traditional owners past and present of the lands of the Barada Barna people and thank them for their guidance and contributions. We thank all QM Geosciences staff and volunteers for assistance with this project and in particular thank C. Chiotakis, N. Sands, P. Bishop, E. Cannon, K. Spring, J. Wilkinson, P. Tierney, J. Cramb, N. Newman, I. Mitchell, D. Kenned…	116	57	59	4	70	NATURE PORTFOLIO	BERLIN	HEIDELBERGER PLATZ 3, BERLIN, 14197, GERMANY		2041-1723		NAT COMMUN	Nat. Commun.	2018-05-01	2020	11	1			2250	10.1038/s41467-020-15785-w	http://dx.doi.org/10.1038/s41467-020-15785-w			14
J	Hocknull, SA; Piper, PJ; van den Bergh, GD; Due, RA; Morwood, MJ; Kurniawan, I	Hocknull, Scott A.; Piper, Philip J.; van den Bergh, Gert D.; Due, Rokus Awe; Morwood, Michael J.; Kurniawan, Iwan							Dragon's Paradise Lost: Palaeobiogeography, Evolution and Extinction of the Largest-Ever Terrestrial Lizards (Varanidae)	Plos ONE	English	Article		Squamata; Flores	Background: The largest living lizard species, Varanus komodoensis Ouwens 1912, is vulnerable to extinction, being restricted to a few isolated islands in eastern Indonesia, between Java and Australia, where it is the dominant terrestrial carnivore. Understanding how large-bodied varanids responded to past environmental change underpins long-term management of V. komodoensis populations. Methodol…			Hocknull, SA (corresponding author), Queensland Museum, POB 300, Brisbane, Qld 4101, Australia.	scott.hocknull@qm.qld.gov.au	van den Bergh, Gerrit/I-7670-2016	van den Bergh, Gerrit Dirk/0000-0003-1507-3336; Piper, Philip/0000-0001-9494-4341; Hocknull, Scott/0000-0003-4157-8434				34	52	55	1	50	PUBLIC LIBRARY SCIENCE	SAN FRANCISCO	1160 BATTERY STREET, STE 100, SAN FRANCISCO, CA 94111 USA	1932-6203			PLOS ONE	PLoS One	1930-09-01	2009	4	9			e7241	10.1371/journal.pone.0007241	http://dx.doi.org/10.1371/journal.pone.0007241			15
J	Hocknull, SA; Zhao, JX; Feng, YX; Webb, GE	Hocknull, Scott A.; Zhao, Jian-xin; Feng, Yue-xing; Webb, Gregory E.							Responses of Quaternary rainforest vertebrates to climate change in Australia	Earth and Planetary Science Letters	English	Article	Quaternary rainforest; palaeoclimate; U-Th dating; megafauna; Australia	sea-surface temperatures; Pacific warm pool; Pleistocene; record; variability; tropics; extinction; mammals; monsoon; aridity	A new middle Pleistocene vertebrate fossil record from eastern Australia, dated by U disequilibrium series, records the first Quaternary record of an Australian tropical rainforest fauna. This exceptionally rich fauna underwent extinction after a long period of relative faunal stability, spanning several glacial cycles, and persisted probably until 280000 years ago. Some time between 280000 and 2…	[Hocknull, Scott A.] Queensland Museum, Brisbane, Qld 4000, Australia; [Zhao, Jian-xin; Feng, Yue-xing] Univ Queensland, Ctr Microscopy & Microanal, Radiogen Isotope Lab, St Lucia, Qld 4072, Australia; [Webb, Gregory E.] Queensland Univ Technol, Sch Nat Resource Sci, Brisbane, Qld 4001, Australia	Queensland Museum; University of Queensland; Queensland University of Technology (QUT)	Hocknull, SA (corresponding author), Queensland Museum, PO Box 3300, Brisbane, Qld 4000, Australia.	scott.hocknull@qm.qld.gov.au; j.zhao@uq.edu.au; y.feng@uq.edu.au; ge.webb@qut.edu.au	; Webb, Gregory/B-4481-2011; Zhao, Jian-xin/A-5938-2008	Feng, Yue-Xing/0000-0002-2944-9632; Hocknull, Scott/0000-0003-4157-8434; Webb, Gregory/0000-0002-9206-978X; Zhao, Jian-xin/0000-0002-2413-6178				61	93	103	0	39	ELSEVIER	AMSTERDAM	RADARWEG 29, 1043 NX AMSTERDAM, NETHERLANDS	0012-821X	1385-013X		EARTH PLANET SC LETT	Earth Planet. Sci. Lett.	2015-12-01	2007	264	2025-02-01	317	331		10.1016/j.epsl.2007.10.004	http://dx.doi.org/10.1016/j.epsl.2007.10.004			15
J	Holdaway, RN; Allentoft, ME; Jacomb, C; Oskam, CL; Beavan, NR; Bunce, M	Holdaway, Richard N.; Allentoft, Morten E.; Jacomb, Christopher; Oskam, Charlotte L.; Beavan, Nancy R.; Bunce, Michael							An extremely low-density human population exterminated New Zealand moa	Nature Communications	English	Article		Quaternary fossil faunas; South-Island; extinction; Dinornithiformes; chronology; settlement; ancient; giant; Aves; site	New Zealand moa (Aves: Dinornithiformes) are the only late Quaternary megafauna whose extinction was clearly caused by humans. New Zealand offers the best opportunity to estimate the number of people involved in a megafaunal extinction event because, uniquely, both the Polynesian settlement of New Zealand and moa extinction are recent enough to be dated with a high degree of precision. In additio…	[Holdaway, Richard N.] Palaecol Res Ltd, Christchurch 8042, New Zealand; [Holdaway, Richard N.; Allentoft, Morten E.] Univ Canterbury, Sch Biol Sci, Christchurch 8140, New Zealand; [Allentoft, Morten E.] Univ Copenhagen, Nat Hist Museum, Ctr Geogenet, DK-1350 Copenhagen, Denmark; [Jacomb, Christopher] Univ Otago, Dept Anthropol & Archaeol, Dunedin 9054, New Zealand; [Oskam, Charlotte L.] Murdoch …	University of Canterbury; University of Copenhagen; University of Otago; Murdoch University; University of Otago; Curtin University	Holdaway, RN (corresponding author), Palaecol Res Ltd, POB 16569, Christchurch 8042, New Zealand.	richard.holdaway@canterbury.ac.nz	Bruford, Michael/D-3750-2009; Oskam, Charlotte/N-4097-2018	Beavan, Nancy/0000-0001-5649-0430; Allentoft, Morten/0000-0003-4424-3568; Oskam, Charlotte/0000-0001-8886-2120; Bunce, Michael/0000-0002-0302-4206	Marsden Fund (Royal Society of New Zealand) [06-PAL-001-EEB]; Palaecol Research Ltd [09-UOO-164]; ARC [FT 0991741]	Marsden Fund (Royal Society of New Zealand)(Royal Society of New ZealandMarsden Fund (NZ)); Palaecol Research Ltd; ARC(Australian Research Council)	We thank Alan Tennyson (Te Papa Tongarewa National Museum of New Zealand), R. Paul Scofield (Canterbury Museum, Christchurch, New Zealand) and Carl Mehling, American Museum of Natural History, New York, for access to material in the collections in their care. Martin Jones kindly guided and assisted with the Bayesian analyses and Richard J. Rowe provided other statistical advice and background dis…	54	49	53	1	58	NATURE PUBLISHING GROUP	LONDON	MACMILLAN BUILDING, 4 CRINAN ST, LONDON N1 9XW, ENGLAND	2041-1723			NAT COMMUN	Nat. Commun.	NOV	2014	5				5436	10.1038/ncomms6436	http://dx.doi.org/10.1038/ncomms6436			8
J	Holliday, VT; Daulton, TL; Bartlein, PJ; Boslough, MB; Breslawski, RP; Fisher, AE; Jorgeson, IA; Scott, AC; Koeberl, C; Marlon, JR; Severinghaus, J; Petaev, MI; Claeys, P	Holliday, Vance T.; Daulton, Tyrone L.; Bartlein, Patrick J.; Boslough, Mark B.; Breslawski, Ryan P.; Fisher, Abigail E.; Jorgeson, Ian A.; Scott, Andrew C.; Koeberl, Christian; Marlon, Jennifer R.; Severinghaus, Jeffrey; Petaev, Michail I.; Claeys, Philippe							Comprehensive refutation of the Younger Dryas Impact Hypothesis (YDIH)	Earth-Science Reviews	English	Article	cosmic impact; Younger Dryas; impact indicators; platinum anomaly; microspherules; nanodiamonds; abrupt climate change; Clovis complex; megafaunal extinctions; wildfire; coherent catastrophism; black mat; usselo soil; confirmation bias	southern High Plains; biomass burning episode; polycyclis aromatic hydrocarbons; Pleistocene Holocene transition; nanodiamond rich layer; abrupt climate change; Laacher See eruption; Central Great Plains; Lubbock lake site; cosmic impact	A series of publications purport to provide evidence that the Earth was subjected to an extraterrestrial event or events at similar to 12.9 ka creating an environmental cataclysm and the onset of the Younger Dryas stadial. The varied and sometime conflicting speculations in those publications have become known collectively as the Younger Dryas Impact Hypothesis (YDIH). As the YDIH has evolved, it…	[Holliday, Vance T.] Univ Arizona, Sch Anthropol, Tucson, AZ 85721 USA; [Holliday, Vance T.] Univ Arizona, Dept Geosci, Tucson, AZ 85721 USA; [Daulton, Tyrone L.] Washington Univ, Dept Phys, Space Sci Lab, St Louis, MO USA; [Daulton, Tyrone L.] Washington Univ St Louis, Inst Mat Sci & Engn, St Louis, MO USA; [Bartlein, Patrick J.] Univ Oregon, Dept Geog, Eugene, OR USA; [Boslough, Mark B.] Univ N…	University of Arizona; University of Arizona; Washington University (WUSTL); Washington University (WUSTL); University of Oregon; University of New Mexico; Southern Methodist University; University of London; Royal Holloway University London; University of Vienna; Yale University; University of California System; University of California San Diego; Scripps Institution of Oceanography; Harvard Uni…	Holliday, VT (corresponding author), Univ Arizona, Sch Anthropol, Tucson, AZ 85721 USA.;Holliday, VT (corresponding author), Univ Arizona, Dept Geosci, Tucson, AZ 85721 USA.	vthollid@email.arizona.edu	Bartlein, Patrick/E-4643-2011; Claeys, Philippe/B-4895-2008	Koeberl, Christian/0000-0001-5155-7405; Claeys, Philippe/0000-0002-4585-7687	University of Arizona Foundation; VUB Strategic Research Program; NASA's Solar System Exploration Research Virtual Institute [80NSSC19M0214]; Asteroid Surface Science (CLASS); NSF [CNH-L 1824770]; Leverhulme Emeritus Fellowship [EM -2012-054]; Argonaut Archaeological Research Fund	University of Arizona Foundation; VUB Strategic Research Program; NASA's Solar System Exploration Research Virtual Institute; Asteroid Surface Science (CLASS); NSF(National Science Foundation (NSF)); Leverhulme Emeritus Fellowship(Leverhulme Trust); Argonaut Archaeological Research Fund	This paper is part of the continuing research of the Argonaut Archaeological Research Fund (V.T. Holliday, Director; University of Arizona Foundation) . We thank David Meltzer, Todd Surovell, and two anonymous reviewers for valuable comments that improved this manuscript. Jason Windingstad helped with editing. We appreciate the support of E -SR Editor Alessandra Negri during our manuscript prepar…	499	7	7	17	32	ELSEVIER	AMSTERDAM	RADARWEG 29, 1043 NX AMSTERDAM, NETHERLANDS	0012-8252	1872-6828		EARTH-SCI REV	Earth-Sci. Rev.	DEC	2023	247				104502	10.1016/j.earscirev.2023.104502	http://dx.doi.org/10.1016/j.earscirev.2023.104502		2023-11-01	75
J	Holliday, VT; Daulton, TL; Bartlein, PJ; Boslough, MB; Breslawski, RP; Fisher, AE; Jorgeson, IA; Scott, AC; Koeberl, C; Marlon, JR; Severinghaus, J; Petaev, MI; Claeys, P	Holliday, Vance. T.; Daulton, Tyrone L.; Bartlein, Patrick J.; Boslough, Mark B.; Breslawski, Ryan P.; Fisher, Abigail E.; Jorgeson, Ian A.; Scott, Andrew C.; Koeberl, Christian; Marlon, Jennifer R.; Severinghaus, Jeffrey; Petaev, Michail I.; Claeys, Philippe							Rebuttal of Sweatman, Powell, and West's Rejection of Holliday et al.'s alleged refutation of the Younger Dryas Impact Hypothesis	Earth-Science Reviews	English	Article	Younger Dryas; impact indicators; platinum anomaly; microspherules; nanodiamonds; abrupt climate change; Clovis complex; megafaunal extinctions; wildfire; coherent catastrophism; black mat; usselo soil; confirmation bias	biomass burning episode; northern Hemisphere; boundary; extinctions; wildfire; lake; ice	We stand by our original review. There is no support for a cosmic-origin catastrophe at 12,850 cal years BP. There is also no support that at 12,850 cal years BP human populations diminished, late Pleistocene megafauna were wiped out or reduced, and an unique global climate change occurred. The comments are largely built around the same claims we previously rebutted (and rebut here again) based o…	[Holliday, Vance. T.] Univ Arizona, Sch Anthropol, Tucson, AZ 85721 USA; [Holliday, Vance. T.] Univ Arizona, Dept Geosci, Tucson, AZ 85721 USA; [Daulton, Tyrone L.] Washington Univ, Dept Phys, Lab Space Sci, St Louis, MO 63130 USA; [Daulton, Tyrone L.] Washington Univ, Inst Mat Sci & Engn, St Louis, MO USA; [Bartlein, Patrick J.] Univ Oregon, Dept Geog, Eugene, OR USA; [Boslough, Mark B.] Univ Ne…	University of Arizona; University of Arizona; Washington University (WUSTL); Washington University (WUSTL); University of Oregon; University of New Mexico; Southern Methodist University; University of London; Royal Holloway University London; University of Vienna; Yale University; University of California System; University of California San Diego; Scripps Institution of Oceanography; Harvard Uni…	Holliday, VT (corresponding author), Univ Arizona, Sch Anthropol, Tucson, AZ 85721 USA.;Holliday, VT (corresponding author), Univ Arizona, Dept Geosci, Tucson, AZ 85721 USA.	vthollid@arizona.edu	Bartlein, Patrick/E-4643-2011; Claeys, Philippe/B-4895-2008	Claeys, Philippe/0000-0002-4585-7687				73	0	0	1	1	ELSEVIER	AMSTERDAM	RADARWEG 29, 1043 NX AMSTERDAM, NETHERLANDS	0012-8252	1872-6828		EARTH-SCI REV	Earth-Sci. Rev.	NOV	2024	258				104961	10.1016/j.earscirev.2024.104961	http://dx.doi.org/10.1016/j.earscirev.2024.104961		2024-11-01	9
J	Hubbe, A; Hubbe, M; Karmann, I; Cruz, FW; Neves, WA	Hubbe, Alex; Hubbe, Mark; Karmann, Ivo; Cruz, Francisco W.; Neves, Walter A.							Insights into Holocene megafauna survival and extinction in southeastern Brazil from new AMS 14C dates	Quaternary Research	English	Article	karst environment; South America; overkill; Late Quaternary paleoclimate; geochronology	South America; 4300 BP; radiocarbon; climate; range; calibration; Argentina; remains; record; fauna	The extinction of late Quaternary megafauna in South America has been extensively debated in past decades. The majority of the hypotheses explaining this phenomenon argue that the extinction was the result of human activities, environmental changes, or even synergism between the two. Although still limited, a good chronological framework is imperative to discuss the plausibility of the available …	[Hubbe, Alex; Neves, Walter A.] Univ Sao Paulo, Lab Estudos Evolut Humanos, Dept Genet & Biol Evolut, Inst Biociencias, BR-05508090 Sao Paulo, Brazil; [Hubbe, Alex] Inst Carste, BR-30360260 Belo Horizonte, MG, Brazil; [Hubbe, Mark] Ohio State Univ, Dept Anthropol, Columbus, OH 43210 USA; [Hubbe, Mark] Univ Catolica Norte, Inst Invest Arqueol & Museo, San Pedro De Atacama 1410000, Chile; [Karmann,…	Universidade de Sao Paulo; University System of Ohio; Ohio State University; Universidad Catolica del Norte; Universidade de Sao Paulo	Hubbe, A (corresponding author), Univ Sao Paulo, Lab Estudos Evolut Humanos, Dept Genet & Biol Evolut, Inst Biociencias, Rua Matao 277, BR-05508090 Sao Paulo, Brazil.	alexhubbe@yahoo.com	Neves, Walter/Q-8316-2016; karmann, ivo/H-8106-2013; Hubbe, Alex/K-6230-2012; Hubbe, Mark/AAC-1043-2020; Cruz, Francisco/G-6059-2012; Hubbe, Mark/G-3440-2012	karmann, ivo/0000-0001-6905-8962; Hubbe, Mark/0000-0003-4433-3942; Hubbe, Alex/0000-0002-3226-0144; Cruz, Francisco/0000-0002-4030-4581	FAPESP [81/0693-3, 04/0132-16, 08/58554-3]; CNPq [300917/2010-4]	FAPESP(Fundacao de Amparo a Pesquisa do Estado de Sao Paulo (FAPESP)); CNPq(Conselho Nacional de Desenvolvimento Cientifico e Tecnologico (CNPQ))	We are deeply indebted to Hussam Zaher and Alberto Carvalho, for kindly allowing and assisting us in the collection of samples from the fossil material housed at Museu de Zoologia da Universidade de Sao Paulo and to Paulo Miguel Haddad-Martim, the editors and two anonymous reviewers for their insightful comments on a previous draft of this manuscript. We would like to thank Christina Torres-Rouff…	60	14	17	1	56	CAMBRIDGE UNIV PRESS	NEW YORK	32 AVENUE OF THE AMERICAS, NEW YORK, NY 10013-2473 USA	0033-5894	1096-0287		QUATERNARY RES	Quat. Res.	MAR	2013	79	2	152	157		10.1016/j.yqres.2012.11.009	http://dx.doi.org/10.1016/j.yqres.2012.11.009			6
J	Hubbe, A; Hubbe, M; Neves, WA	Hubbe, Alex; Hubbe, Mark; Neves, Walter A.							The Brazilian megamastofauna of the Pleistocene/Holocene transition and its relationship with the early human settlement of the continent	Earth-Science Reviews	English	Article	Quaternary; mammals; extinction; South America; Early Americans; megafauna	South America; Late Quaternary; Early Holocene; anthropogenic modification; megafaunal extinction; Eremotherium tooth; sloths Xenarthra; 4300 BP; cave; Mammalia	One of the most intriguing questions regarding the Brazilian Late Quaternary extinct megafauna and Homo sapiens is to what extent they coexisted and how humans could have contributed to the former's extinction. The aim of this article is to review the chronological and archaeological evidences of their coexistence in Brazil and to evaluate the degree of direct interaction between them. Critical a…	[Hubbe, Alex; Neves, Walter A.] Univ Sao Paulo, Inst Biociencias, Dept Genet Biol Evolut, Lab Estudos Evolut Humanos, BR-05508 Sao Paulo, Brazil; [Hubbe, Alex] Inst Carste, BR-30360 Belo Horizonte, MG, Brazil; [Hubbe, Mark] Ohio State Univ, Dept Anthropol, Columbus, OH 43210 USA; [Hubbe, Mark] Univ Catel Norte, Inst Invest Arqueol Museo, San Pedro 1410000, Chile	Universidade de Sao Paulo; University System of Ohio; Ohio State University	Hubbe, A (corresponding author), Univ Sao Paulo, Inst Biociencias, Dept Genet Biol Evolut, Lab Estudos Evolut Humanos, Rua Matao 277, BR-05508 Sao Paulo, Brazil.	alexhubbe@yahoo.com	Hubbe, Alex/K-6230-2012; Neves, Walter/Q-8316-2016; Hubbe, Mark/AAC-1043-2020; Hubbe, Mark/G-3440-2012	Hubbe, Alex/0000-0002-3226-0144; Hubbe, Mark/0000-0003-4433-3942	FAPESP [04/0132-16, 08/58554-3]; CNPq [300917/2010-4]	FAPESP(Fundacao de Amparo a Pesquisa do Estado de Sao Paulo (FAPESP)); CNPq(Conselho Nacional de Desenvolvimento Cientifico e Tecnologico (CNPQ))	We would like to thank Augusto Auler for providing important references for our discussion and Leonardo Kerber, Ana Maria Ribeiro and Elizete Holanda for assisting us with information regarding dates from Rio Grande do Sul. We are indebted to Christina Torres-Rouff for helping with the English version of the manuscript. We also thank FAPESP for research grants to WN (04/0132-16) and a scholarship…	112	27	31	0	46	ELSEVIER SCIENCE BV	AMSTERDAM	PO BOX 211, 1000 AE AMSTERDAM, NETHERLANDS	0012-8252	1872-6828		EARTH-SCI REV	Earth-Sci. Rev.	MAR	2013	118		1	10		10.1016/j.earscirev.2013.01.003	http://dx.doi.org/10.1016/j.earscirev.2013.01.003			10
J	Huntley, B; Allen, JRM; Collingham, YC; Hickler, T; Lister, AM; Singarayer, J; Stuart, AJ; Sykes, MT; Valdes, PJ	Huntley, Brian; Allen, Judy R. M.; Collingham, Yvonne C.; Hickler, Thomas; Lister, Adrian M.; Singarayer, Joy; Stuart, Anthony J.; Sykes, Martin T.; Valdes, Paul J.							Millennial Climatic Fluctuations Are Key to the Structure of Last Glacial Ecosystems	Plos ONE	English	Article		European vegetation; isotope stage-3; ice; variability; mammoths; dynamics; southern; records; model; ages	Whereas fossil evidence indicates extensive treeless vegetation and diverse grazing megafauna in Europe and northern Asia during the last glacial, experiments combining vegetation models and climate models have to-date simulated widespread persistence of trees. Resolving this conflict is key to understanding both last glacial ecosystems and extinction of most of the mega-herbivores. Using a dynam…	[Huntley, Brian; Allen, Judy R. M.; Collingham, Yvonne C.; Stuart, Anthony J.] Univ Durham, Sch Biol & Biomed Sci, Durham, England; [Hickler, Thomas] Senckenberg Gesell Nat Forsch, Biodivers & Climate Res Ctr BiK F, Frankfurt, Germany; [Hickler, Thomas] Goethe Univ Frankfurt, Dept Phys Geog, D-60054 Frankfurt, Germany; [Lister, Adrian M.] Nat Hist Museum, Dept Palaeontol, Palaeontol Res Div, Lond…	Durham University; Leibniz Association; Senckenberg Gesellschaft fur Naturforschung (SGN); Senckenberg Biodiversitat & Klima- Forschungszentrum (BiK-F); Goethe University Frankfurt; Natural History Museum London; University of Bristol; Lund University	Huntley, B (corresponding author), Univ Durham, Sch Biol & Biomed Sci, Durham, England.	brian.huntley@durham.ac.uk	Valdes, Paul/T-2004-2019; Hickler, Thomas/S-6287-2016	Hickler, Thomas/0000-0002-4668-7552; Lister, Adrian/0000-0002-7985-138X; Valdes, Paul/0000-0002-1902-3283	UK Natural Environment Research Council [NE/G00188X/1]; NERC [NE/D003105/1, NE/D003105/2, NE/G00188X/1, NE/G006989/1, NE/G005982/1] Funding Source: UKRI	UK Natural Environment Research Council(UK Research & Innovation (UKRI)Natural Environment Research Council (NERC)); NERC(UK Research & Innovation (UKRI)Natural Environment Research Council (NERC))	The research reported was supported by grant NE/G00188X/1 awarded by the UK Natural Environment Research Council (http://www.nerc.ac.uk/). The funder had no role in study design, data collection and analysis, decision to publish, or preparation of the manuscript.	41	44	46	0	48	PUBLIC LIBRARY SCIENCE	SAN FRANCISCO	1160 BATTERY STREET, STE 100, SAN FRANCISCO, CA 94111 USA	1932-6203			PLOS ONE	PLoS One	2016-04-01	2013	8	4			e61963	10.1371/journal.pone.0061963	http://dx.doi.org/10.1371/journal.pone.0061963			7
J	Iijima, M; Qiao, Y; Lin, WN; Peng, YJ; Yoneda, M; Liu, J	Iijima, Masaya; Qiao, Yu; Lin, Wenbin; Peng, Youjie; Yoneda, Minoru; Liu, Jun							An intermediate crocodylian linking two extant gharials from the Bronze Age of China and its human-induced extinction	Proceedings of the Royal Society B-Biological Sciences	English	Article	phylogeny; crocodylia; acoustics; sexual selection; extinction; Holocene	phylogenetic relationships: crocodiles; morphology; megafauna; alligator; patterns; Gavialis; climate; time	A solid phylogenetic framework is the basis of biological studies, yet higher level relationships are still unresolved in some major vertebrate lineages. One such group is Crocodylia, where the branching pattern of three major families (Alligatoridae, Crocodylidae and Gavialidae) has been disputed over decades due to the uncertain relationship of two slender-snouted lineages, gavialines and tomis…	[Iijima, Masaya; Qiao, Yu; Liu, Jun] Hefei Univ Technol, Sch Resource & Environm Engn, 193 Tunxi Rd, Hefei 230009, Anhui, Peoples R China; [Iijima, Masaya] Clemson Univ, Dept Biol Sci, Clemson, SC 29634 USA; [Iijima, Masaya] Nagoya Univ Museum, Chikusa Ku, Nagoya, Aichi 4648601, Japan; [Lin, Wenbin] Xinhui Museum, 12 Gongyuan Rd, Jiangmen 529199, Guangdong, Peoples R China; [Peng, Youjie] Shunde …	Hefei University of Technology; Clemson University; Nagoya University; University of Tokyo	Liu, J (corresponding author), Hefei Univ Technol, Sch Resource & Environm Engn, 193 Tunxi Rd, Hefei 230009, Anhui, Peoples R China.	junliu@hfut.edu.cn	YONEDA, Minoru/P-4436-2019; yu, qiao/GXH-3197-2022; Liu, Jun/D-9874-2017	Liu, Jun/0000-0001-7859-5209; Iijima, Masaya/0000-0003-2701-0391	National Natural Science Foundation of China [42172026, 41772003, 42002021]; Fundamental Research Funds for the Central Universities of China [PA2020GDKC0022]; Department of Natural Resources of Anhui Province [2021-g-216]; China Scholarship Council [202106690044]; JSPS [19J00701, 15H05969, 20H05821]; Grants-in-Aid for Scientific Research [20H05821, 19J00701, 15H05969] Funding Source: KAKEN	National Natural Science Foundation of China(National Natural Science Foundation of China (NSFC)); Fundamental Research Funds for the Central Universities of China(Fundamental Research Funds for the Central Universities); Department of Natural Resources of Anhui Province; China Scholarship Council(China Scholarship Council); JSPS(Ministry of Education, Culture, Sports, Science and Technology, Jap…	This study was supported by National Natural Science Foundation of China (grant nos. 42172026 and 41772003 to J.L., and 42002021 to M.I.); Fundamental Research Funds for the Central Universities of China (grant no. PA2020GDKC0022 to J.L.); Department of Natural Resources of Anhui Province (grant no. 2021-g-216 to J.L.); China Scholarship Council (grant no. 202106690044 to Y.Q.); and JSPS Grant-in…	88	12	13	1	24	ROYAL SOC	LONDON	6-9 CARLTON HOUSE TERRACE, LONDON SW1Y 5AG, ENGLAND	0962-8452	1471-2954		P ROY SOC B-BIOL SCI	Proc. R. Soc. B-Biol. Sci.	2009-03-01	2022	289	1970			20220085	10.1098/rspb.2022.0085	http://dx.doi.org/10.1098/rspb.2022.0085			9
J	Immel, A; Drucker, DG; Bonazzi, M; Jahnke, TK; Münzel, SC; Schuenemann, VJ; Herbig, A; Kind, CJ; Krause, J	Immel, Alexander; Drucker, Dorothee G.; Bonazzi, Marion; Jahnke, Tina K.; Muenzel, Susanne C.; Schuenemann, Verena J.; Herbig, Alexander; Kind, Claus-Joachim; Krause, Johannes							Mitochondrial Genomes of Giant Deers Suggest their Late Survival in Central Europe	Scientific Reports	English	Article		Megaloceros giganteus; molecular phylogeny; Early Holocene; evolution; Pleistocene; Neanderthal; pattern	The giant deer Megaloceros giganteus is among the most fascinating Late Pleistocene Eurasian megafauna that became extinct at the end of the last ice age. Important questions persist regarding its phylogenetic relationship to contemporary taxa and the reasons for its extinction. We analyzed two large ancient cervid bone fragments recovered from cave sites in the Swabian Jura (Baden-Wurttemberg, G…	[Immel, Alexander; Schuenemann, Verena J.; Herbig, Alexander; Krause, Johannes] Univ Tubingen, Inst Archaeol Sci Archaeo & Palaeogenet, Tubingen, Germany; [Drucker, Dorothee G.] Univ Tubingen, Dept Geosci, Palaeobiol, Tubingen, Germany; [Bonazzi, Marion] Univ Kiel, Inst Clin Mol Biol, Kiel, Germany; [Jahnke, Tina K.; Kind, Claus-Joachim] State Off Cultural Heritage Baden Wuerttemberg, D-73728 Ess…	Eberhard Karls University of Tubingen; Eberhard Karls University of Tubingen; University of Kiel; Eberhard Karls University of Tubingen; Leibniz Association; Senckenberg Gesellschaft fur Naturforschung (SGN); Eberhard Karls University of Tubingen	Krause, J (corresponding author), Univ Tubingen, Inst Archaeol Sci Archaeo & Palaeogenet, Tubingen, Germany.	johannes.krause@uni-tuebingen.de	Krause, Johannes/AFP-2642-2022; Drucker, Dorothee G./E-8900-2011	Munzel, Susanne/0000-0002-9871-6335; Schuenemann, Verena/0000-0002-8593-3672; Herbig, Alexander/0000-0003-1176-1166; Drucker, Dorothee G./0000-0003-0854-4371; Krause, Johannes/0000-0001-9144-3920	European Research Council Starting Grant APGREID; Ministry of Science, Research and Arts of Baden-Wurttemberg; European Social Fund	European Research Council Starting Grant APGREID(European Research Council (ERC)); Ministry of Science, Research and Arts of Baden-Wurttemberg; European Social Fund(European Social Fund (ESF))	We thank Kerttu Majander for the elaborate deer drawings and Adrian Lister as well as Kirsten Bos for valuable comments that greatly improved the manuscript. This research was funded by European Research Council Starting Grant APGREID (to A.I. and J.K.). The European Social Fund and Ministry of Science, Research and Arts of Baden-Wurttemberg funded the current position of Dorothee G. Drucker.	33	31	33	0	45	NATURE PORTFOLIO	BERLIN	HEIDELBERGER PLATZ 3, BERLIN, 14197, GERMANY	2045-2322			SCI REP-UK	Sci Rep	2008-06-01	2015	5				10853	10.1038/srep10853	http://dx.doi.org/10.1038/srep10853			9
J	Jeffers, ES; Whitehouse, NJ; Lister, A; Plunkett, G; Barratt, P; Smyth, E; Lamb, P; Dee, MW; Brooks, SJ; Willis, KJ; Froyd, CA; Watson, JE; Bonsall, MB	Jeffers, Elizabeth S.; Whitehouse, Nicki J.; Lister, Adrian; Plunkett, Gill; Barratt, Phil; Smyth, Emma; Lamb, Philip; Dee, Michael W.; Brooks, Stephen J.; Willis, Katherine J.; Froyd, Cynthia A.; Watson, Jenny E.; Bonsall, Michael B.							Plant controls on Late Quaternary whole ecosystem structure and function	Ecology Letters	English	Article	climate change; landscape burning; megafauna extinction; nutrient cycling; plant community composition; plant-plant interactions; plant-soil interactions	air temperatures; climate-change; extinction; vegetation; impacts; facilitation; communities; charcoal; pollen; CO	Plants and animals influence biomass production and nutrient cycling in terrestrial ecosystems; however, their relative importance remains unclear. We assessed the extent to which mega-herbivore species controlled plant community composition and nutrient cycling, relative to other factors during and after the Late Quaternary extinction event in Britain and Ireland, when two-thirds of the region's…	[Jeffers, Elizabeth S.; Willis, Katherine J.; Bonsall, Michael B.] Univ Oxford, Dept Zool, Oxford OX1 3PS, England; [Whitehouse, Nicki J.; Barratt, Phil] Univ Plymouth, Sch Geog Earth & Environm Sci, Plymouth PL4 8AA, Devon, England; [Lister, Adrian] Nat Hist Museum London, Dept Earth Sci, London SW7 5BD, England; [Plunkett, Gill; Smyth, Emma; Watson, Jenny E.] Queens Univ Belfast, Sch Nat & Buil…	University of Oxford; University of Plymouth; Natural History Museum London; Queens University Belfast; University of Oxford; University of Oxford; Natural History Museum London; Royal Botanic Gardens, Kew; Swansea University; Ulster University; University of East Anglia; University of Groningen	Jeffers, ES (corresponding author), Univ Oxford, Dept Zool, Oxford OX1 3PS, England.	elizabeth.jeffers@zoo.ox.ac.uk	Dee, M.W./AAU-3258-2020; Plunkett, Gill/F-3311-2010; Jeffers, Elizabeth/D-4021-2013; Froyd, Cynthia/A-8488-2012	Lister, Adrian/0000-0002-7985-138X; Froyd, Cynthia/0000-0001-5291-9156; Dee, Michael/0000-0002-3116-453X; Jeffers, Elizabeth/0000-0001-9679-5909; Whitehouse, Nicola/0000-0002-7044-6492; Willis, Katherine/0000-0002-6763-2489; Plunkett, Gill/0000-0003-1014-3454	NERC [NE/G005982/1, NE/P002536/1] Funding Source: UKRI	NERC(UK Research & Innovation (UKRI)Natural Environment Research Council (NERC))		61	14	15	2	46	WILEY	HOBOKEN	111 RIVER ST, HOBOKEN 07030-5774, NJ USA	1461-023X	1461-0248		ECOL LETT	Ecol. Lett.	JUN	2018	21	6	814	825		10.1111/ele.12944	http://dx.doi.org/10.1111/ele.12944			12
J	Johnson, CN	Johnson, CN							Determinants of loss of mammal species during the Late Quaternary 'megafauna' extinctions: life history and ecology, but not body size	Proceedings of the Royal Society B-Biological Sciences	English	Article	extinction risk; megafauna; Pleistocene extinctions; overkill	Pleistocene	Extinctions of megafauna species during the Late Quaternary dramatically reduced the global diversity of mammals. There is intense debate over the causes of these extinctions, especially regarding the extent to which humans were involved. Most previous analyses of this question have focused on chronologies of extinction and on the archaeological evidence for human-megafauna interaction. Here, I t…	James Cook Univ N Queensland, Sch Trop Biol, Townsville, Qld 4811, Australia	James Cook University	James Cook Univ N Queensland, Sch Trop Biol, Townsville, Qld 4811, Australia.	christopher@johnson@jcu.edu.au	Johnson, Chris/J-7894-2014	Johnson, Chris/0000-0002-9719-3771				38	182	210	6	205	ROYAL SOC	LONDON	6-9 CARLTON HOUSE TERRACE, LONDON SW1Y 5AG, ENGLAND	0962-8452	1471-2954		P ROY SOC B-BIOL SCI	Proc. R. Soc. B-Biol. Sci.	2007-11-01	2002	269	1506	2221	2227		10.1098/rspb.2002.2130	http://dx.doi.org/10.1098/rspb.2002.2130			7
J	Johnson, CN	Johnson, C. N.							Ecological consequences of Late Quaternary extinctions of megafauna	Proceedings of the Royal Society B-Biological Sciences	English	Review	trophic cascade; ecosystem engineer; plant anachronisms; herbivory; seed dispersal; plant-animal interactions	South Island; Pleistocene extinctions; vegetation openness; black mats; Holocene; plant; tundra; fire; anachronisms; dispersal	Large herbivorous vertebrates have strong interactions with vegetation, affecting the structure, composition and dynamics of plant communities in many ways. Living large herbivores are a small remnant of the assemblages of giants that existed in most terrestrial ecosystems 50 000 years ago. The extinction of so many large herbivores may well have triggered large changes in plant communities. In s…	James Cook Univ, Sch Marine & Trop Biol, Townsville, Qld 4811, Australia	James Cook University	Johnson, CN (corresponding author), James Cook Univ, Sch Marine & Trop Biol, Townsville, Qld 4811, Australia.	christopher.johnson@jcu.edu.au	Johnson, Chris/J-7894-2014	Johnson, Chris/0000-0002-9719-3771				95	211	243	10	216	ROYAL SOC	LONDON	6-9 CARLTON HOUSE TERRACE, LONDON SW1Y 5AG, ENGLAND	0962-8452	1471-2954		P ROY SOC B-BIOL SCI	Proc. R. Soc. B-Biol. Sci.	2022-07-01	2009	276	1667	2509	2519		10.1098/rspb.2008.1921	http://dx.doi.org/10.1098/rspb.2008.1921			11
J	Johnson, CN; Bradshaw, CJA; Cooper, A; Gillespie, R; Brook, BW	Johnson, Chris N.; Bradshaw, Corey J. A.; Cooper, Alan; Gillespie, Richard; Brook, Barry W.							Rapid megafaunal extinction following human arrival throughout the New World	Quaternary International	English	Article		America	Lima-Ribeiro and Diniz-Filho (2013) present a new compilation and analysis of the chronologies of human arrival and megafaunal extinction throughout the Americas. They find that in many places megafauna were apparently extinct before humans arrived; in many others, megafauna coexisted with humans for thousands of years before going extinct. They conclude that human impact made at most a minor and…	[Johnson, Chris N.] Univ Tasmania, Sch Zool, Hobart, Tas 7001, Australia; [Bradshaw, Corey J. A.; Cooper, Alan; Brook, Barry W.] Univ Adelaide, Inst Environm, Adelaide, SA 5005, Australia; [Bradshaw, Corey J. A.; Cooper, Alan; Brook, Barry W.] Univ Adelaide, Sch Earth & Environm Sci, Adelaide, SA 5005, Australia; [Cooper, Alan] Univ Adelaide, Australian Ctr Ancient DNA, Adelaide, SA 5005, Austral…	University of Tasmania; University of Adelaide; University of Adelaide; University of Adelaide; University of Wollongong; Australian National University	Johnson, CN (corresponding author), Univ Tasmania, Sch Zool, Private Bag 5, Hobart, Tas 7001, Australia.	c.n.johnson@utas.edu.au	Gillespie, Robyn/AFR-4963-2022; Cooper, Alan/E-8171-2012; Bradshaw, Corey/A-1311-2008; Johnson, Chris/J-7894-2014; Brook, Barry/G-2686-2011	Bradshaw, Corey/0000-0002-5328-7741; Gillespie, Richard/0000-0003-0555-2595; Johnson, Chris/0000-0002-9719-3771; Cooper, Alan/0000-0002-7738-7851; Brook, Barry/0000-0002-2491-1517	Australian Research Council	Australian Research Council(Australian Research Council)	We are grateful to M. Lima-Ribeiro for productive discussion, and for his help in interpreting the analyses presented in Lima-Ribeiro and Diniz-Filho (2013). Authors CJ, CB, AC and BB are supported by the Australian Research Council; the ARC had no role in study design, data analysis or writing, and the decision to publish.	13	16	17	1	60	PERGAMON-ELSEVIER SCIENCE LTD	OXFORD	THE BOULEVARD, LANGFORD LANE, KIDLINGTON, OXFORD OX5 1GB, ENGLAND	1040-6182	1873-4553		QUATERN INT	Quat. Int.	2002-10-01	2013	308		273	277		10.1016/j.quaint.2013.06.022	http://dx.doi.org/10.1016/j.quaint.2013.06.022			5
J	Johnson, CN; Prideaux, GJ	Johnson, CN; Prideaux, GJ							Extinctions of herbivorous mammals in the late Pleistocene of Australia in relation to their feeding ecology: No evidence for environmental change as cause of extinction	Austral Ecology	English	Article	browser; climate change; extinction rates; grazer; Marsupialia; megafauna; overkill; Quaternary	Late Quaternary; megafauna	There has been debate over the cause of the extinction of 'megafauna' species during the late Pleistocene of Australia. One view is that environmental change, either natural or human-induced, was the main factor in the extinctions. Some support for this comes from the observation that, among herbivores, most of the species that went extinct were apparently browsers rather than grazers. Browsers w…	James Cook Univ N Queensland, Sch Trop Biol, Townsville, Qld 4811, Australia; Flinders Univ S Australia, Sch Biol Sci, Adelaide, SA 5001, Australia	James Cook University; Flinders University South Australia	James Cook Univ N Queensland, Sch Trop Biol, Townsville, Qld 4811, Australia.	christopher.johnson@jcu.edu.au	; Johnson, Chris/J-7894-2014	Prideaux, Gavin/0000-0002-9958-0265; Johnson, Chris/0000-0002-9719-3771				34	35	38	3	60	WILEY	HOBOKEN	111 RIVER ST, HOBOKEN 07030-5774, NJ USA	1442-9985	1442-9993		AUSTRAL ECOL	Austral Ecol.	OCT	2004	29	5	553	557		10.1111/j.1442-9993.2004.01389.x	http://dx.doi.org/10.1111/j.1442-9993.2004.01389.x			5
J	Jones, DB; Desantis, LRG	Jones, Davis Brent; Desantis, Larisa R. G.							Dietary ecology of ungulates from the La Brea tar pits in southern California: A multi-proxy approach	Palaeogeography Palaeoclimatology Palaeoecology	English	Article	climate change; dental mesowear; dental microwear; diet; La Brea; stable isotopes	dental microwear texture; carbon isotope fractionation; stable-isotopes; Late Pleistocene; premaxillary shape; Middle Pleistocene; grassland biome; fossil camels; error rates; tooth wear	The La Brea Tar Pits are a highly fossiliferous late Pleistocene locality, with over 230 vertebrate species, and the potential to help clarify the ecology of Pleistocene megafauna prior to their extinction. Here, we analyze dental microwear textures, dental mesowear, and stable carbon isotopes to assess the dietary behavior of the three most abundant ungulates at La Brea. We examined Bison antiqu…	[Jones, Davis Brent; Desantis, Larisa R. G.] Vanderbilt Univ, Dept Earth & Environm Sci, 221 Kirkland Hall, Nashville, TN 37235 USA; [Desantis, Larisa R. G.] La Brea Tar Pits & Museum, Dept Rancho La Brea, Los Angeles, CA 90036 USA	Vanderbilt University	Desantis, LRG (corresponding author), Vanderbilt Univ, Dept Earth & Environm Sci, 221 Kirkland Hall, Nashville, TN 37235 USA.	davis.b.jones@vanderbilt.edu; larisa.desantis@vanderbilt.edu		DeSantis, Larisa/0000-0003-1159-9154	EAR grant [1053839]; Vanderbilt University; Littlejohn Family; Division Of Earth Sciences; Directorate For Geosciences [1053839] Funding Source: National Science Foundation	EAR grant; Vanderbilt University; Littlejohn Family; Division Of Earth Sciences; Directorate For Geosciences(National Science Foundation (NSF)NSF - Directorate for Geosciences (GEO))	We would like to thank the Vanderbilt Dietary Reconstructions and Ecological Assessments of Mammals (DREAM) lab and others, including: J. Bradham, J. Crites, D. DeSantis, B. Gibson, C. Hedberg, A. Hurst, A Henderson, L. Loffredo, J. Rubinstein, and G. Smith for help performing mesowear studies and/or feedback. We would also like to thank E. Westwig, N. Duncan, and R. MacPhee for access to the Ame…	112	42	49	0	29	ELSEVIER SCIENCE BV	AMSTERDAM	PO BOX 211, 1000 AE AMSTERDAM, NETHERLANDS	0031-0182	1872-616X		PALAEOGEOGR PALAEOCL	Paleogeogr. Paleoclimatol. Paleoecol.	2015-01-01	2017	466		110	127		10.1016/j.palaeo.2016.11.019	http://dx.doi.org/10.1016/j.palaeo.2016.11.019			18
J	Jones, TL; Porcasi, JF; Erlandson, JM; Dallas, H; Wake, TA; Schwaderer, R	Jones, T. L.; Porcasi, J. F.; Erlandson, J. M.; Dallas, H., Jr.; Wake, T. A.; Schwaderer, R.							The protracted Holocene extinction of California's flightless sea duck (Chendytes lawi) and its implications for the Pleistocene overkill hypothesis	Proceedings of the National Academy of Sciences of the United States of America	English	Article	flightless birds; overhunting	human impacts; islands	Bones of the flightless sea duck (Chendytes lawi) from 14 archaeological sites along the California coast indicate that humans hunted the species for at least 8,000 years before it was driven to extinction. Direct 14 C dates on Chendytes bones show that the duck was exploited on the southern California islands as early as approximate to 11,150-10,280 calendar years B.P., and on the mainland by at…	[Jones, T. L.] Calif Polytech State Univ San Luis Obispo, Dept Social Sci, San Luis Obispo, CA 93407 USA; [Porcasi, J. F.; Wake, T. A.] Univ Calif Los Angeles, Cotsen Inst Archaeol, Los Angeles, CA 90095 USA; [Erlandson, J. M.] Univ Oregon, Dept Anthropol, Eugene, OR 97403 USA; [Dallas, H., Jr.] CAL FIRE, El Cajon, CA 92019 USA; [Schwaderer, R.] Calif Dept Pk & Recreat, Monterey, CA 93940 USA	California State University System; California Polytechnic State University San Luis Obispo; University of California System; University of California Los Angeles; University of Oregon	Jones, TL (corresponding author), Calif Polytech State Univ San Luis Obispo, Dept Social Sci, San Luis Obispo, CA 93407 USA.	tljones@calpoly.edu	Erlandson, Jon/ITV-0032-2023	Wake, Thomas/0000-0001-8001-5058; Erlandson, Jon/0000-0002-4705-4319				27	54	68	0	31	NATL ACAD SCIENCES	WASHINGTON	2101 CONSTITUTION AVE NW, WASHINGTON, DC 20418 USA	0027-8424			P NATL ACAD SCI USA	Proc. Natl. Acad. Sci. U. S. A.	2018-03-01	2008	105	11	4105	4108		10.1073/pnas.0711140105	http://dx.doi.org/10.1073/pnas.0711140105			4
J	Joos, J; Pimiento, C; Miles, DB; Müller, J	Joos, Julia; Pimiento, Catalina; Miles, Donald B.; Mueller, Johannes							Quaternary megafauna extinctions altered body size distribution in tortoises	Proceedings of the Royal Society B-Biological Sciences	English	Article	late Quaternary extinction; size-biased extinction; body size reduction; Testudinidae; carapace length; trait variation	giant tortoises; seed dispersal; island rule; Pleistocene; phylogeny; turtles; consequences; Testudines; evolution; history	The late Quaternary is characterized by the extinction of many terrestrial megafauna, which included tortoises (Family: Testudinidae). However, limited information is available on how extinction shaped the phenotype of surviving taxa. Here, based on a global dataset of straight carapace length, we investigate the temporal variation, spatial distribution and evolution of tortoise body size over th…	[Joos, Julia; Miles, Donald B.] Ohio Univ, Dept Biol Sci, Athens, OH 45701 USA; [Joos, Julia; Mueller, Johannes] Leibniz Inst Evolut & Biodivers Sci, Museum Nat Kunde, Invalidenstr 43, D-10115 Berlin, Germany; [Pimiento, Catalina] Univ Zurich, Paleontol Inst & Museum, CH-8006 Zurich, Switzerland; [Pimiento, Catalina] Swansea Univ, Dept Biosci, Wallace Bldg,Singleton Pk, Swansea SA2 8PP, W Glam, W…	University System of Ohio; Ohio University; Leibniz Institut fur Evolutions und Biodiversitatsforschung; University of Zurich; Swansea University; Smithsonian Institution; Smithsonian Tropical Research Institute	Joos, J (corresponding author), Ohio Univ, Dept Biol Sci, Athens, OH 45701 USA.;Joos, J (corresponding author), Leibniz Inst Evolut & Biodivers Sci, Museum Nat Kunde, Invalidenstr 43, D-10115 Berlin, Germany.	jj064318@ohio.edu	Miles, Donald/AFW-0480-2022; Pimiento, Catalina/ABF-1204-2020; Muller, Johannes/A-6293-2017	Muller, Johannes/0000-0001-5801-856X; Miles, Donald/0000-0001-5768-179X; Pimiento, Catalina/0000-0002-5320-7246				79	5	5	0	9	ROYAL SOC	LONDON	6-9 CARLTON HOUSE TERRACE, LONDON SW1Y 5AG, ENGLAND	0962-8452	1471-2954		P ROY SOC B-BIOL SCI	Proc. R. Soc. B-Biol. Sci.	1930-11-01	2022	289	1987			20221947	10.1098/rspb.2022.1947	http://dx.doi.org/10.1098/rspb.2022.1947			10
[truncated: 193 more rows]
[truncated: 24 more columns]
